# Supplementary material for: ADAR1 drives stemness of leukemia initiating cells in T-cell acute lymphoblastic leukemia via attenuating immunogenic dsRNA sensing
Source: Research Square preprint supplement (doi:10.21203/rs.3.rs-2444524/v1), 2023-01-17
Supplement: Supplementary file 1 [file 450f36c744217d55aac1aeb7.xlsx]

## Sheet: Sheet1
Gene Symbol	Sample	Position	Alu	Level of Editing	strand	Location_Classification
ABL2	MCG070 shADAR1	179101511	Alu	0.166667	-	3'UTR
ADAT1	MCG070 shADAR1	75599178	Alu	0.181818	-	3'UTR
ADAT1	MCG070 shADAR1	75599337	Alu	0.1875	-	3'UTR
ADAT1	MCG070 shADAR1	75599363	Alu	0.25	-	3'UTR
ALDH6A1	MCG070 shADAR1	74058138	Alu	0.222222	-	3'UTR
ALDH8A1	MCG070 shADAR1	134917971	Alu	0.4	-	3'UTR
APOBEC3D	MCG070 shADAR1	39033063	Alu	0.3125	+	3'UTR
APOBEC3D	MCG070 shADAR1	39033096	Alu	0.2	+	3'UTR
APOBEC3D	MCG070 shADAR1	39033161	Alu	0.325	+	3'UTR
APOBEC3F	MCG070 shADAR1	39053067	Alu	0.222222	+	3'UTR
APPL1	MCG070 shADAR1	57272806	Alu	0.5	+	3'UTR
ARL17A	MCG070 shADAR1	46553003	Alu	0.4	-	3'UTR
ARPIN	MCG070 shADAR1	89897250	Alu	0.272727	-	3'UTR
AS3MT	MCG070 shADAR1	102900826	Alu	0.25	+	3'UTR
AS3MT	MCG070 shADAR1	102901019	Alu	0.5	+	3'UTR
BORCS8	MCG070 shADAR1	19177395	Alu	0.307692	-	3'UTR
C15orf40	MCG070 shADAR1	83005358	Alu	0.352941	-	3'UTR
CACNG8	MCG070 shADAR1	53984755	Alu	0.195652	+	3'UTR
CACNG8	MCG070 shADAR1	53984826	Alu	0.145161	+	3'UTR
CACNG8	MCG070 shADAR1	53985648	Alu	0.144928	+	3'UTR
CACNG8	MCG070 shADAR1	53985713	Alu	0.81203	+	3'UTR
CALCOCO2	MCG070 shADAR1	48864141	Alu	0.285714	+	3'UTR
CALCOCO2	MCG070 shADAR1	48864164	Alu	0.181818	+	3'UTR
CASP10	MCG070 shADAR1	201219150	Alu	0.25	+	3'UTR
CASP10	MCG070 shADAR1	201219159	Alu	0.25	+	3'UTR
CASP10	MCG070 shADAR1	201219195	Alu	0.4	+	3'UTR
CASP8	MCG070 shADAR1	201286733	Alu	0.142857	+	3'UTR
CEP89	MCG070 shADAR1	32876213	Alu	0.444444	-	3'UTR
CHST12	MCG070 shADAR1	2441572	Alu	0.333333	+	3'UTR
CLN8	MCG070 shADAR1	1784217	Alu	0.416667	+	3'UTR
CLPB	MCG070 shADAR1	72289708	Alu	0.2	-	3'UTR
CLPB	MCG070 shADAR1	72290699	Alu	0.285714	-	3'UTR
CLPB	MCG070 shADAR1	72290714	Alu	0.333333	-	3'UTR
CLPB	MCG070 shADAR1	72291854	Alu	1	-	3'UTR
CLPB	MCG070 shADAR1	72291876	Alu	0.5	-	3'UTR
CLSPN	MCG070 shADAR1	35733825	Alu	0.4	-	3'UTR
CLSPN	MCG070 shADAR1	35733829	Alu	0.4	-	3'UTR
CLSPN	MCG070 shADAR1	35734566	Alu	0.157895	-	3'UTR
CLSPN	MCG070 shADAR1	35734571	Alu	0.210526	-	3'UTR
COX18	MCG070 shADAR1	73057026	Alu	0.454545	-	3'UTR
CWF19L1	MCG070 shADAR1	100232502	Alu	0.155172	-	3'UTR
CWF19L1	MCG070 shADAR1	100233053	Alu	0.235294	-	3'UTR
CXorf56	MCG070 shADAR1	119538668	Alu	0.2	-	3'UTR
CXorf56	MCG070 shADAR1	119538708	Alu	0.769231	-	3'UTR
CXorf56	MCG070 shADAR1	119538709	Alu	0.923077	-	3'UTR
CYP20A1	MCG070 shADAR1	203298297	Alu	0.181818	+	3'UTR
CYP20A1	MCG070 shADAR1	203298303	Alu	0.166667	+	3'UTR
DCAF16	MCG070 shADAR1	17801226	Alu	0.285714	-	3'UTR
DCAF16	MCG070 shADAR1	17801267	Alu	0.4	-	3'UTR
DCAF16	MCG070 shADAR1	17801936	Alu	1	-	3'UTR
DCAF16	MCG070 shADAR1	17802039	Alu	0.6	-	3'UTR
DCLRE1C	MCG070 shADAR1	14907135	Alu	0.4	-	3'UTR
DCLRE1C	MCG070 shADAR1	14907136	Alu	0.4	-	3'UTR
DFFA	MCG070 shADAR1	10457219	Alu	0.242424	-	3'UTR
DFFA	MCG070 shADAR1	10457256	Alu	0.166667	-	3'UTR
DFFA	MCG070 shADAR1	10457257	Alu	0.166667	-	3'UTR
DFFA	MCG070 shADAR1	10457481	Alu	0.285714	-	3'UTR
DFFA	MCG070 shADAR1	10457566	Alu	0.363636	-	3'UTR
DFFA	MCG070 shADAR1	10457578	Alu	0.25	-	3'UTR
DFFA	MCG070 shADAR1	10458676	Alu	0.181818	-	3'UTR
DFFA	MCG070 shADAR1	10459007	Alu	0.27907	-	3'UTR
DFFA	MCG070 shADAR1	10460668	Alu	0.1875	-	3'UTR
DSTN	MCG070 shADAR1	17609252	Alu	0.5	+	3'UTR
DUSP18	MCG070 shADAR1	30662647	Alu	0.333333	-	3'UTR
DUSP18	MCG070 shADAR1	30662798	Alu	0.368421	-	3'UTR
DYNC1H1	MCG070 shADAR1	102054892	Alu	0.384615	+	3'UTR
EIF2AK2	MCG070 shADAR1	37103288	Alu	0.333333	-	3'UTR
EIF2AK2	MCG070 shADAR1	37103360	Alu	0.636364	-	3'UTR
EIF2AK2	MCG070 shADAR1	37103423	Alu	0.230769	-	3'UTR
EIF2AK2	MCG070 shADAR1	37100527	Nonalu	0.4	-	3'UTR
ELP2	MCG070 shADAR1	36174913	Alu	0.285714	+	3'UTR
ELP2	MCG070 shADAR1	36174932	Alu	0.222222	+	3'UTR
ELP2	MCG070 shADAR1	36179206	Alu	0.375	+	3'UTR
ENSA	MCG070 shADAR1	150621370	Alu	0.272727	-	3'UTR
EXOG	MCG070 shADAR1	38525705	Alu	0.222222	+	3'UTR
EXOG	MCG070 shADAR1	38525761	Alu	0.333333	+	3'UTR
EXOSC6	MCG070 shADAR1	70249181	Alu	0.21875	-	3'UTR
EXOSC6	MCG070 shADAR1	70249888	Alu	0.176471	-	3'UTR
FAF1	MCG070 shADAR1	50437821	Alu	0.5	-	3'UTR
FAM118A	MCG070 shADAR1	45340841	Alu	0.333333	+	3'UTR
FAM118A	MCG070 shADAR1	45340986	Alu	0.333333	+	3'UTR
FBXL18	MCG070 shADAR1	5476577	Alu	0.181818	-	3'UTR
FOXO3	MCG070 shADAR1	108683631	Alu	0.333333	+	3'UTR
GABPB2	MCG070 shADAR1	151123278	Alu	0.2	+	3'UTR
GABPB2	MCG070 shADAR1	151123280	Alu	0.133333	+	3'UTR
GABPB2	MCG070 shADAR1	151123358	Alu	0.222222	+	3'UTR
GABPB2	MCG070 shADAR1	151123394	Alu	0.428571	+	3'UTR
GABPB2	MCG070 shADAR1	151123589	Alu	1	+	3'UTR
GAPVD1	MCG070 shADAR1	125364425	Alu	0.142857	+	3'UTR
GAPVD1	MCG070 shADAR1	125364428	Alu	0.142857	+	3'UTR
GATC	MCG070 shADAR1	120460855	Alu	0.166667	+	3'UTR
GATC	MCG070 shADAR1	120461208	Alu	0.958333	+	3'UTR
GATC	MCG070 shADAR1	120461272	Alu	0.655172	+	3'UTR
GCNT2	MCG070 shADAR1	10628801	Alu	0.333333	+	3'UTR
GEMIN6	MCG070 shADAR1	38782213	Alu	0.133333	+	3'UTR
GGA2	MCG070 shADAR1	23465775	Alu	0.166667	-	3'UTR
GINM1	MCG070 shADAR1	149591145	Alu	0.153846	+	3'UTR
GINS1	MCG070 shADAR1	25447921	Alu	0.181818	+	3'UTR
GINS4	MCG070 shADAR1	41542129	Alu	0.272727	+	3'UTR
GINS4	MCG070 shADAR1	41542277	Alu	0.833333	+	3'UTR
GINS4	MCG070 shADAR1	41543969	Alu	0.6	+	3'UTR
GJC1	MCG070 shADAR1	44798925	Alu	0.25	-	3'UTR
GJC1	MCG070 shADAR1	44798941	Alu	0.333333	-	3'UTR
GJC1	MCG070 shADAR1	44798961	Alu	0.6	-	3'UTR
GMPS	MCG070 shADAR1	155943021	Alu	0.5	+	3'UTR
GNL3L	MCG070 shADAR1	54560785	Alu	0.6	+	3'UTR
GNL3L	MCG070 shADAR1	54560857	Alu	0.4	+	3'UTR
GNL3L	MCG070 shADAR1	54560865	Alu	0.666667	+	3'UTR
GNPNAT1	MCG070 shADAR1	52775760	Alu	0.222222	-	3'UTR
GPATCH2L	MCG070 shADAR1	76207066	Alu	0.2	+	3'UTR
GPATCH2L	MCG070 shADAR1	76207236	Alu	0.375	+	3'UTR
GRSF1	MCG070 shADAR1	70816228	Alu	0.25	-	3'UTR
GSR	MCG070 shADAR1	30679086	Alu	0.166667	-	3'UTR
H6PD	MCG070 shADAR1	9271035	Alu	0.2	+	3'UTR
HLA-DOA	MCG070 shADAR1	33005854	Alu	0.8	-	3'UTR
HOOK3	MCG070 shADAR1	43020955	Alu	0.181818	+	3'UTR
HOOK3	MCG070 shADAR1	43021034	Alu	0.333333	+	3'UTR
HOOK3	MCG070 shADAR1	43021943	Alu	0.428571	+	3'UTR
IFNAR1	MCG070 shADAR1	33355807	Alu	0.151515	+	3'UTR
IL17RA	MCG070 shADAR1	17113215	Alu	0.285714	+	3'UTR
IL17RA	MCG070 shADAR1	17113332	Alu	0.176471	+	3'UTR
IL17RA	MCG070 shADAR1	17113380	Alu	0.470588	+	3'UTR
IL17RA	MCG070 shADAR1	17113459	Alu	0.25	+	3'UTR
INIP	MCG070 shADAR1	112684505	Alu	0.857143	-	3'UTR
INIP	MCG070 shADAR1	112685300	Alu	0.625	-	3'UTR
IPP	MCG070 shADAR1	45698811	Alu	0.5	-	3'UTR
IPP	MCG070 shADAR1	45699736	Alu	0.2	-	3'UTR
IRGQ	MCG070 shADAR1	43590142	Alu	0.166667	-	3'UTR
JMJD6	MCG070 shADAR1	76713183	Alu	0.571429	-	3'UTR
KAT7	MCG070 shADAR1	49830409	Alu	0.428571	+	3'UTR
KAT7	MCG070 shADAR1	49832199	Alu	0.6	+	3'UTR
KIF1C	MCG070 shADAR1	5026488	Alu	0.520833	+	3'UTR
KIF1C	MCG070 shADAR1	5026521	Alu	0.177419	+	3'UTR
KIF1C	MCG070 shADAR1	5026568	Alu	0.308824	+	3'UTR
KIF1C	MCG070 shADAR1	5027393	Alu	0.571429	+	3'UTR
KIF1C	MCG070 shADAR1	5027724	Alu	0.346154	+	3'UTR
KRR1	MCG070 shADAR1	75496272	Alu	0.5	-	3'UTR
L2HGDH	MCG070 shADAR1	50246545	Alu	0.25	-	3'UTR
L2HGDH	MCG070 shADAR1	50246550	Alu	0.25	-	3'UTR
L2HGDH	MCG070 shADAR1	50246586	Alu	0.444444	-	3'UTR
LONP2	MCG070 shADAR1	48353290	Alu	0.4	+	3'UTR
LONP2	MCG070 shADAR1	48353296	Alu	0.2	+	3'UTR
LONP2	MCG070 shADAR1	48353346	Alu	0.4	+	3'UTR
LONP2	MCG070 shADAR1	48353350	Alu	0.4	+	3'UTR
LONP2	MCG070 shADAR1	48354269	Alu	0.25	+	3'UTR
LONP2	MCG070 shADAR1	48354471	Alu	0.133333	+	3'UTR
LONP2	MCG070 shADAR1	48354472	Alu	0.1875	+	3'UTR
LRCH3	MCG070 shADAR1	197885522	Alu	0.333333	+	3'UTR
LRRC57	MCG070 shADAR1	42539131	Alu	0.333333	-	3'UTR
LRRC57	MCG070 shADAR1	42542986	Alu	0.142857	-	3'UTR
LRRC57	MCG070 shADAR1	42543009	Alu	0.125	-	3'UTR
LRRC57	MCG070 shADAR1	42543262	Alu	0.333333	-	3'UTR
LRRC57	MCG070 shADAR1	42543292	Alu	0.133333	-	3'UTR
LRRC57	MCG070 shADAR1	42543311	Alu	0.2	-	3'UTR
LYRM7	MCG070 shADAR1	131201154	Alu	0.142857	+	3'UTR
LYRM7	MCG070 shADAR1	131201175	Alu	0.142857	+	3'UTR
LYRM7	MCG070 shADAR1	131202409	Alu	0.6	+	3'UTR
MAGT1	MCG070 shADAR1	77828382	Alu	0.4	-	3'UTR
MAVS	MCG070 shADAR1	3869544	Alu	0.428571	+	3'UTR
MAVS	MCG070 shADAR1	3869636	Alu	0.4	+	3'UTR
MAVS	MCG070 shADAR1	3869788	Alu	0.133333	+	3'UTR
MAVS	MCG070 shADAR1	3875197	Alu	0.172414	+	3'UTR
MBD3	MCG070 shADAR1	1573836	Alu	0.333333	-	3'UTR
MBD3	MCG070 shADAR1	1573880	Alu	0.333333	-	3'UTR
MCPH1	MCG070 shADAR1	6643391	Alu	0.285714	+	3'UTR
MCPH1	MCG070 shADAR1	6643430	Alu	1	+	3'UTR
MCPH1	MCG070 shADAR1	6643448	Alu	0.333333	+	3'UTR
MCUR1	MCG070 shADAR1	13790656	Alu	0.285714	-	3'UTR
MCUR1	MCG070 shADAR1	13790699	Alu	0.333333	-	3'UTR
MDM4	MCG070 shADAR1	204551160	Alu	0.136364	+	3'UTR
MDM4	MCG070 shADAR1	204556585	Alu	0.153846	+	3'UTR
MDM4	MCG070 shADAR1	204557426	Alu	0.194444	+	3'UTR
MED18	MCG070 shADAR1	28335065	Alu	0.416667	+	3'UTR
METTL16	MCG070 shADAR1	2417334	Alu	0.166667	-	3'UTR
METTL16	MCG070 shADAR1	2417357	Alu	0.642857	-	3'UTR
METTL2B	MCG070 shADAR1	128503552	Alu	0.285714	+	3'UTR
METTL2B	MCG070 shADAR1	128503568	Alu	0.714286	+	3'UTR
METTL2B	MCG070 shADAR1	128503878	Alu	0.285714	+	3'UTR
METTL2B	MCG070 shADAR1	128503883	Alu	0.285714	+	3'UTR
METTL8	MCG070 shADAR1	171322169	Alu	0.6	-	3'UTR
METTL8	MCG070 shADAR1	171322219	Alu	0.428571	-	3'UTR
METTL8	MCG070 shADAR1	171322236	Alu	0.333333	-	3'UTR
METTL8	MCG070 shADAR1	171323394	Alu	0.153846	-	3'UTR
METTL8	MCG070 shADAR1	171323476	Alu	0.153846	-	3'UTR
MFSD13A	MCG070 shADAR1	102476282	Alu	0.461538	+	3'UTR
MPHOSPH8	MCG070 shADAR1	19672935	Alu	0.174603	+	3'UTR
MPHOSPH8	MCG070 shADAR1	19672976	Alu	0.163934	+	3'UTR
MRI1	MCG070 shADAR1	13773206	Alu	0.6	+	3'UTR
MRI1	MCG070 shADAR1	13773605	Alu	0.75	+	3'UTR
MRI1	MCG070 shADAR1	13773711	Alu	0.947368	+	3'UTR
MRI1	MCG070 shADAR1	13773758	Alu	0.368421	+	3'UTR
MRI1	MCG070 shADAR1	13773913	Alu	0.266667	+	3'UTR
MRPL30	MCG070 shADAR1	99195951	Alu	0.222222	+	3'UTR
MRPL30	MCG070 shADAR1	99195987	Alu	0.25	+	3'UTR
MRPL30	MCG070 shADAR1	99196380	Alu	0.666667	+	3'UTR
MRPL30	MCG070 shADAR1	99196394	Alu	0.285714	+	3'UTR
MRPL30	MCG070 shADAR1	99196434	Alu	0.9	+	3'UTR
MRPL30	MCG070 shADAR1	99196515	Alu	0.357143	+	3'UTR
MRPS10	MCG070 shADAR1	42207346	Alu	0.155556	-	3'UTR
MRPS11	MCG070 shADAR1	88478730	Alu	0.4	+	3'UTR
MRPS11	MCG070 shADAR1	88478842	Alu	0.454545	+	3'UTR
MRPS11	MCG070 shADAR1	88478868	Alu	0.333333	+	3'UTR
MRPS11	MCG070 shADAR1	88478910	Alu	0.428571	+	3'UTR
MRPS11	MCG070 shADAR1	88480356	Alu	0.307692	+	3'UTR
MRPS11	MCG070 shADAR1	88480374	Alu	0.307692	+	3'UTR
MRPS21	MCG070 shADAR1	150308756	Alu	0.163636	+	3'UTR
MRPS23	MCG070 shADAR1	57836186	Alu	0.2	-	3'UTR
MRPS23	MCG070 shADAR1	57838204	Alu	0.4	-	3'UTR
MRPS23	MCG070 shADAR1	57838208	Alu	0.4	-	3'UTR
MRPS25	MCG070 shADAR1	15049847	Alu	0.2	-	3'UTR
NDUFC2	MCG070 shADAR1	78068663	Alu	0.222222	-	3'UTR
NDUFC2	MCG070 shADAR1	78069059	Alu	0.230769	-	3'UTR
NDUFC2	MCG070 shADAR1	78069071	Alu	0.384615	-	3'UTR
NDUFC2	MCG070 shADAR1	78069163	Alu	0.166667	-	3'UTR
NDUFV3	MCG070 shADAR1	42911067	Alu	0.714286	+	3'UTR
NDUFV3	MCG070 shADAR1	42911096	Alu	0.375	+	3'UTR
NDUFV3	MCG070 shADAR1	42911136	Alu	0.4	+	3'UTR
NDUFV3	MCG070 shADAR1	42911149	Alu	0.4	+	3'UTR
NDUFV3	MCG070 shADAR1	42912228	Alu	0.285714	+	3'UTR
NDUFV3	MCG070 shADAR1	42912637	Alu	0.222222	+	3'UTR
NHEJ1	MCG070 shADAR1	219075622	Alu	0.181818	-	3'UTR
NHEJ1	MCG070 shADAR1	219075624	Alu	0.181818	-	3'UTR
NICN1	MCG070 shADAR1	49423512	Alu	0.8	-	3'UTR
NICN1	MCG070 shADAR1	49423513	Alu	0.6	-	3'UTR
NMT2	MCG070 shADAR1	15108284	Alu	0.125	-	3'UTR
NMT2	MCG070 shADAR1	15108366	Alu	0.171429	-	3'UTR
NOL9	MCG070 shADAR1	6522718	Alu	0.125	-	3'UTR
NOL9	MCG070 shADAR1	6522772	Alu	0.285714	-	3'UTR
NOM1	MCG070 shADAR1	156970054	Alu	0.478261	+	3'UTR
NOM1	MCG070 shADAR1	156970189	Alu	0.315789	+	3'UTR
NOM1	MCG070 shADAR1	156970212	Alu	0.411765	+	3'UTR
NOP14	MCG070 shADAR1	2938437	Alu	0.222222	-	3'UTR
NOP14	MCG070 shADAR1	2938538	Alu	0.144444	-	3'UTR
ORC2	MCG070 shADAR1	200909670	Alu	0.818182	-	3'UTR
PDF	MCG070 shADAR1	69327305	Alu	0.333333	-	3'UTR
PDF	MCG070 shADAR1	69327316	Alu	0.285714	-	3'UTR
PEX2	MCG070 shADAR1	76982622	Alu	0.142857	-	3'UTR
PFAS	MCG070 shADAR1	8269931	Alu	0.133333	+	3'UTR
PFAS	MCG070 shADAR1	8270058	Alu	0.137255	+	3'UTR
PGAM5	MCG070 shADAR1	132721509	Alu	0.6	+	3'UTR
PGPEP1	MCG070 shADAR1	18366951	Alu	0.333333	+	3'UTR
PGPEP1	MCG070 shADAR1	18366993	Alu	0.3	+	3'UTR
PGPEP1	MCG070 shADAR1	18367049	Alu	0.428571	+	3'UTR
PGPEP1	MCG070 shADAR1	18367091	Alu	0.333333	+	3'UTR
PGPEP1	MCG070 shADAR1	18368012	Alu	0.307692	+	3'UTR
PGPEP1	MCG070 shADAR1	18368075	Alu	0.3125	+	3'UTR
PHACTR4	MCG070 shADAR1	28498921	Alu	0.25	+	3'UTR
PHACTR4	MCG070 shADAR1	28498957	Alu	0.5	+	3'UTR
PHACTR4	MCG070 shADAR1	28499519	Alu	0.416667	+	3'UTR
PHAX	MCG070 shADAR1	126625355	Alu	0.380952	+	3'UTR
PHAX	MCG070 shADAR1	126625476	Alu	0.26087	+	3'UTR
PHC3	MCG070 shADAR1	170089751	Alu	0.166667	-	3'UTR
PHC3	MCG070 shADAR1	170089760	Alu	0.166667	-	3'UTR
PHC3	MCG070 shADAR1	170089795	Alu	0.222222	-	3'UTR
PHC3	MCG070 shADAR1	170089817	Alu	0.222222	-	3'UTR
PIGBOS1	MCG070 shADAR1	55317452	Alu	0.193548	-	3'UTR
PIK3R2	MCG070 shADAR1	18170002	Alu	0.181818	+	3'UTR
PNPLA3	MCG070 shADAR1	43947103	Alu	0.4	+	3'UTR
POLR2D	MCG070 shADAR1	127843890	Alu	0.885714	-	3'UTR
POLR2D	MCG070 shADAR1	127844791	Alu	0.25	-	3'UTR
POLR2D	MCG070 shADAR1	127844792	Alu	0.625	-	3'UTR
POLR2D	MCG070 shADAR1	127844878	Alu	0.285714	-	3'UTR
POLR2D	MCG070 shADAR1	127844888	Alu	0.714286	-	3'UTR
POLR2D	MCG070 shADAR1	127844921	Alu	0.285714	-	3'UTR
POLR2D	MCG070 shADAR1	127845557	Alu	0.3125	-	3'UTR
POLR2D	MCG070 shADAR1	127846080	Alu	0.833333	-	3'UTR
POLR2D	MCG070 shADAR1	127846086	Alu	0.4	-	3'UTR
POLR2D	MCG070 shADAR1	127846131	Alu	0.833333	-	3'UTR
POLR3D	MCG070 shADAR1	22253776	Alu	0.428571	+	3'UTR
POLR3D	MCG070 shADAR1	22253793	Alu	0.571429	+	3'UTR
PPIA	MCG070 shADAR1	44801920	Alu	0.186441	+	3'UTR
PPIA	MCG070 shADAR1	44802329	Alu	0.17757	+	3'UTR
PRKAR2A	MCG070 shADAR1	48750241	Alu	0.222222	-	3'UTR
PRKAR2A	MCG070 shADAR1	48750251	Alu	0.625	-	3'UTR
PRKAR2A	MCG070 shADAR1	48750423	Alu	0.5	-	3'UTR
PRR11	MCG070 shADAR1	59201707	Alu	0.333333	+	3'UTR
PRR11	MCG070 shADAR1	59201709	Alu	0.222222	+	3'UTR
PSMB2	MCG070 shADAR1	35602768	Alu	0.333333	-	3'UTR
PTCD3	MCG070 shADAR1	86139319	Alu	0.3	+	3'UTR
PTCD3	MCG070 shADAR1	86139420	Alu	0.25	+	3'UTR
PTPN14	MCG070 shADAR1	214356382	Nonalu	0.355263	-	3'UTR
PTPN14	MCG070 shADAR1	214356397	Nonalu	0.402597	-	3'UTR
PVR	MCG070 shADAR1	44662304	Alu	0.25	+	3'UTR
PVR	MCG070 shADAR1	44662309	Alu	0.222222	+	3'UTR
RAB11FIP4	MCG070 shADAR1	31534285	Alu	0.416667	+	3'UTR
RAB11FIP4	MCG070 shADAR1	31534385	Alu	0.162791	+	3'UTR
RAB11FIP4	MCG070 shADAR1	31534452	Alu	0.677419	+	3'UTR
RAD51	MCG070 shADAR1	40732002	Alu	0.272727	+	3'UTR
RAD51	MCG070 shADAR1	40732003	Alu	0.272727	+	3'UTR
RBM28	MCG070 shADAR1	128307852	Alu	0.176471	-	3'UTR
RBM28	MCG070 shADAR1	128307926	Alu	0.833333	-	3'UTR
RBM8A	MCG070 shADAR1	145921979	Alu	0.230769	-	3'UTR
RBM8A	MCG070 shADAR1	145922076	Alu	0.230769	-	3'UTR
RBM8A	MCG070 shADAR1	145922142	Alu	0.428571	-	3'UTR
RBM8A	MCG070 shADAR1	145922148	Alu	0.857143	-	3'UTR
RBM8A	MCG070 shADAR1	145923018	Alu	0.433333	-	3'UTR
RBM8A	MCG070 shADAR1	145923163	Alu	0.6	-	3'UTR
RBSN	MCG070 shADAR1	15072947	Alu	0.153846	-	3'UTR
RBSN	MCG070 shADAR1	15072979	Alu	0.352941	-	3'UTR
REL	MCG070 shADAR1	60922838	Alu	0.4	+	3'UTR
RILPL1	MCG070 shADAR1	123470373	Alu	0.6	-	3'UTR
RILPL1	MCG070 shADAR1	123470437	Alu	0.666667	-	3'UTR
RILPL1	MCG070 shADAR1	123470440	Alu	0.333333	-	3'UTR
RNF24	MCG070 shADAR1	3928568	Alu	0.245283	-	3'UTR
RNFT2	MCG070 shADAR1	116851574	Alu	0.333333	+	3'UTR
RNFT2	MCG070 shADAR1	116851641	Alu	0.6	+	3'UTR
RPL14	MCG070 shADAR1	40466484	Alu	0.181818	+	3'UTR
RPL14	MCG070 shADAR1	40466485	Alu	0.181818	+	3'UTR
RPL37	MCG070 shADAR1	40830645	Alu	0.285714	-	3'UTR
RPL37	MCG070 shADAR1	40830767	Alu	0.384615	-	3'UTR
RPL37	MCG070 shADAR1	40830768	Alu	0.461538	-	3'UTR
RPL37A	MCG070 shADAR1	216502242	Alu	0.222222	+	3'UTR
RPS19	MCG070 shADAR1	41872816	Alu	0.2	+	3'UTR
RSL1D1	MCG070 shADAR1	11835320	Alu	0.142857	-	3'UTR
RTCA	MCG070 shADAR1	100292031	Alu	0.181818	+	3'UTR
RTCA	MCG070 shADAR1	100292032	Alu	0.181818	+	3'UTR
SDHAF4	MCG070 shADAR1	70589371	Alu	0.5	+	3'UTR
SF3B3	MCG070 shADAR1	70576875	Alu	0.365854	+	3'UTR
SLC12A6	MCG070 shADAR1	34232500	Alu	0.666667	-	3'UTR
SLC12A6	MCG070 shADAR1	34232507	Alu	0.666667	-	3'UTR
SLC25A16	MCG070 shADAR1	68481076	Alu	0.8	-	3'UTR
SLC35E1	MCG070 shADAR1	16552534	Alu	0.16	-	3'UTR
SLC35E2B	MCG070 shADAR1	1663538	Alu	0.25	-	3'UTR
SLC35E2B	MCG070 shADAR1	1663567	Alu	0.625	-	3'UTR
SLC35E3	MCG070 shADAR1	68765537	Alu	0.25	+	3'UTR
SMYD4	MCG070 shADAR1	1781012	Alu	0.384615	-	3'UTR
SMYD4	MCG070 shADAR1	1781057	Alu	0.2	-	3'UTR
SMYD4	MCG070 shADAR1	1781058	Alu	0.533333	-	3'UTR
SMYD4	MCG070 shADAR1	1781148	Alu	0.333333	-	3'UTR
SMYD4	MCG070 shADAR1	1781202	Alu	0.210526	-	3'UTR
SNRPD3	MCG070 shADAR1	24572606	Alu	0.214286	+	3'UTR
SNRPD3	MCG070 shADAR1	24572610	Alu	0.266667	+	3'UTR
SNRPD3	MCG070 shADAR1	24573655	Alu	0.142857	+	3'UTR
SNRPD3	MCG070 shADAR1	24573661	Alu	0.214286	+	3'UTR
SOAT1	MCG070 shADAR1	179357302	Alu	0.133333	+	3'UTR
SOAT1	MCG070 shADAR1	179357369	Alu	0.2	+	3'UTR
SP110	MCG070 shADAR1	230168068	Alu	0.428571	-	3'UTR
SPC24	MCG070 shADAR1	11146013	Alu	0.22973	-	3'UTR
SPC24	MCG070 shADAR1	11146049	Alu	0.307031	-	3'UTR
SPC24	MCG070 shADAR1	11146653	Alu	0.193548	-	3'UTR
SPC24	MCG070 shADAR1	11146832	Alu	0.155172	-	3'UTR
SPC24	MCG070 shADAR1	11146968	Alu	0.277778	-	3'UTR
SPC24	MCG070 shADAR1	11146997	Alu	0.215686	-	3'UTR
SPC24	MCG070 shADAR1	11147028	Alu	0.731707	-	3'UTR
SPC24	MCG070 shADAR1	11147033	Alu	0.425	-	3'UTR
SPCS3	MCG070 shADAR1	176331176	Nonalu	0.4	+	3'UTR
SPECC1	MCG070 shADAR1	20314560	Alu	0.142857	+	3'UTR
SPN	MCG070 shADAR1	29670108	Alu	0.142857	+	3'UTR
SPN	MCG070 shADAR1	29670139	Alu	0.166667	+	3'UTR
SPN	MCG070 shADAR1	29670238	Alu	0.8	+	3'UTR
SPN	MCG070 shADAR1	29670239	Alu	0.333333	+	3'UTR
SPN	MCG070 shADAR1	29670378	Alu	0.5	+	3'UTR
SRD5A3	MCG070 shADAR1	55371732	Alu	0.833333	+	3'UTR
SRFBP1	MCG070 shADAR1	122027179	Alu	0.285714	+	3'UTR
SRFBP1	MCG070 shADAR1	122027180	Alu	0.285714	+	3'UTR
SSR1	MCG070 shADAR1	7286829	Alu	0.166667	-	3'UTR
SSR1	MCG070 shADAR1	7286830	Alu	0.166667	-	3'UTR
STK4	MCG070 shADAR1	45079118	Alu	0.25	+	3'UTR
STK4	MCG070 shADAR1	45079130	Alu	0.266667	+	3'UTR
SYNJ2BP	MCG070 shADAR1	70367510	Alu	0.2	-	3'UTR
TAF8	MCG070 shADAR1	42080403	Alu	0.227273	+	3'UTR
TAF8	MCG070 shADAR1	42080502	Alu	0.277778	+	3'UTR
TAF8	MCG070 shADAR1	42080539	Alu	0.195122	+	3'UTR
TANGO2	MCG070 shADAR1	20065403	Alu	0.181818	+	3'UTR
TFDP2	MCG070 shADAR1	141945212	Alu	0.5	-	3'UTR
TFDP2	MCG070 shADAR1	141948376	Alu	0.181818	-	3'UTR
TFDP2	MCG070 shADAR1	141948915	Alu	0.333333	-	3'UTR
TFDP2	MCG070 shADAR1	141950039	Alu	0.181818	-	3'UTR
TFDP2	MCG070 shADAR1	141950080	Alu	0.5	-	3'UTR
TFDP2	MCG070 shADAR1	141950096	Alu	0.461538	-	3'UTR
THEM4	MCG070 shADAR1	151874654	Alu	0.129032	-	3'UTR
TIMM50	MCG070 shADAR1	39491952	Alu	0.555556	+	3'UTR
TIMM50	MCG070 shADAR1	39492750	Alu	0.25	+	3'UTR
TIMM50	MCG070 shADAR1	39492751	Alu	0.25	+	3'UTR
TIMM50	MCG070 shADAR1	39492790	Alu	0.166667	+	3'UTR
TIMM50	MCG070 shADAR1	39492826	Alu	0.3	+	3'UTR
TLCD2	MCG070 shADAR1	1704040	Alu	0.5	-	3'UTR
TLCD2	MCG070 shADAR1	1704059	Alu	0.375	-	3'UTR
TLCD2	MCG070 shADAR1	1704085	Alu	0.666667	-	3'UTR
TLCD2	MCG070 shADAR1	1704113	Alu	1	-	3'UTR
TLCD2	MCG070 shADAR1	1704125	Alu	0.6	-	3'UTR
TLCD2	MCG070 shADAR1	1704817	Alu	0.7	-	3'UTR
TMEM170A	MCG070 shADAR1	75443923	Alu	0.153846	-	3'UTR
TMEM170A	MCG070 shADAR1	75445996	Alu	0.210526	-	3'UTR
TMEM189	MCG070 shADAR1	50118757	Alu	0.571429	-	3'UTR
TMEM19	MCG070 shADAR1	71702442	Alu	0.833333	+	3'UTR
TMEM19	MCG070 shADAR1	71702445	Alu	0.6	+	3'UTR
TMEM19	MCG070 shADAR1	71703070	Alu	0.857143	+	3'UTR
TMEM192	MCG070 shADAR1	165078996	Alu	0.272727	-	3'UTR
TMEM241	MCG070 shADAR1	23297504	Alu	0.5	-	3'UTR
TMOD3	MCG070 shADAR1	51913892	Alu	0.375	+	3'UTR
TMOD3	MCG070 shADAR1	51913938	Alu	0.625	+	3'UTR
TMOD3	MCG070 shADAR1	51913958	Alu	0.428571	+	3'UTR
TNFAIP8L1	MCG070 shADAR1	4653211	Alu	0.375	+	3'UTR
TNFAIP8L1	MCG070 shADAR1	4653226	Alu	0.4	+	3'UTR
TNFAIP8L1	MCG070 shADAR1	4654542	Alu	0.363636	+	3'UTR
TPST2	MCG070 shADAR1	26522836	Alu	0.5	-	3'UTR
TPST2	MCG070 shADAR1	26524431	Alu	0.25	-	3'UTR
TPT1	MCG070 shADAR1	45334031	Alu	0.285714	-	3'UTR
TRAPPC2	MCG070 shADAR1	13713627	Alu	0.153846	-	3'UTR
TRIM56	MCG070 shADAR1	101091593	Alu	0.391304	+	3'UTR
TRIM56	MCG070 shADAR1	101091607	Alu	0.45	+	3'UTR
TRMT2B	MCG070 shADAR1	101009678	Alu	0.357143	-	3'UTR
TRMT2B	MCG070 shADAR1	101009679	Alu	0.714286	-	3'UTR
TSEN2	MCG070 shADAR1	12533592	Alu	0.166667	+	3'UTR
TYSND1	MCG070 shADAR1	70138975	Alu	0.375	-	3'UTR
UBOX5	MCG070 shADAR1	3108236	Alu	0.214286	-	3'UTR
UBXN7	MCG070 shADAR1	196353729	Alu	0.524272	-	3'UTR
UBXN7	MCG070 shADAR1	196353753	Alu	0.4	-	3'UTR
UGGT1	MCG070 shADAR1	128194450	Alu	0.333333	+	3'UTR
UGGT1	MCG070 shADAR1	128194452	Alu	0.333333	+	3'UTR
UGGT1	MCG070 shADAR1	128193937	Nonalu	0.3	+	3'UTR
URB1	MCG070 shADAR1	32314475	Alu	0.142857	-	3'UTR
UVSSA	MCG070 shADAR1	1386797	Alu	0.4	+	3'UTR
VMAC	MCG070 shADAR1	5909710	Alu	0.7	+	3'UTR
VMAC	MCG070 shADAR1	5909711	Alu	0.4	+	3'UTR
VPS41	MCG070 shADAR1	38723551	Alu	0.903226	-	3'UTR
VPS41	MCG070 shADAR1	38723558	Alu	0.183333	-	3'UTR
VPS41	MCG070 shADAR1	38723641	Alu	0.285714	-	3'UTR
VPS41	MCG070 shADAR1	38723648	Alu	0.233333	-	3'UTR
VPS53	MCG070 shADAR1	515317	Alu	0.181818	-	3'UTR
VPS53	MCG070 shADAR1	516452	Alu	0.196078	-	3'UTR
VPS53	MCG070 shADAR1	517758	Alu	0.333333	-	3'UTR
XPOT	MCG070 shADAR1	64448989	Alu	0.294118	+	3'UTR
XPOT	MCG070 shADAR1	64449013	Alu	0.16129	+	3'UTR
XPOT	MCG070 shADAR1	64449140	Alu	0.137931	+	3'UTR
XPOT	MCG070 shADAR1	64450354	Alu	0.488889	+	3'UTR
XPOT	MCG070 shADAR1	64450369	Alu	0.538462	+	3'UTR
XRCC2	MCG070 shADAR1	152645818	Alu	0.454545	-	3'UTR
XRCC2	MCG070 shADAR1	152645907	Alu	0.47619	-	3'UTR
XRCC2	MCG070 shADAR1	152645908	Alu	0.238095	-	3'UTR
XRCC2	MCG070 shADAR1	152648224	Alu	0.181818	-	3'UTR
YIPF4	MCG070 shADAR1	32310678	Alu	0.333333	+	3'UTR
YIPF4	MCG070 shADAR1	32310679	Alu	0.5	+	3'UTR
YIPF4	MCG070 shADAR1	32310767	Alu	0.5	+	3'UTR
ZBTB8OS	MCG070 shADAR1	32621287	Alu	0.214286	-	3'UTR
ZNF101	MCG070 shADAR1	19683067	Alu	0.375	+	3'UTR
ZNF101	MCG070 shADAR1	19683079	Alu	0.3	+	3'UTR
ZNF397	MCG070 shADAR1	35247800	Alu	0.1875	+	3'UTR
ZNF397	MCG070 shADAR1	35248579	Alu	0.441176	+	3'UTR
ZNF397	MCG070 shADAR1	35249594	Alu	0.6	+	3'UTR
ZNF397	MCG070 shADAR1	35249610	Alu	0.357143	+	3'UTR
ZNF445	MCG070 shADAR1	44432170	Alu	0.6	-	3'UTR
ZNF506	MCG070 shADAR1	19786351	Alu	0.235294	-	3'UTR
ZNF506	MCG070 shADAR1	19786802	Alu	0.181818	-	3'UTR
ZNF526	MCG070 shADAR1	42227611	Alu	0.25	+	3'UTR
ZNF557	MCG070 shADAR1	7087420	Alu	0.325	+	3'UTR
ZNF587	MCG070 shADAR1	57864334	Alu	0.4	+	3'UTR
ZNF587	MCG070 shADAR1	57864375	Alu	0.5	+	3'UTR
ZNF587B	MCG070 shADAR1	57845102	Alu	0.222222	+	3'UTR
ZNF69	MCG070 shADAR1	11913450	Alu	0.4	+	3'UTR
ZNF69	MCG070 shADAR1	11913453	Alu	0.4	+	3'UTR
ZNF69	MCG070 shADAR1	11913663	Alu	0.333333	+	3'UTR
ZNF69	MCG070 shADAR1	11914070	Alu	0.5	+	3'UTR
ZNF791	MCG070 shADAR1	12631612	Alu	0.428571	+	3'UTR
PSMG3	MCG070 shADAR1	1569646	Alu	0.2	-	5'UTR
PTER	MCG070 shADAR1	16437386	Alu	0.571429	+	5'UTR
SPOP	MCG070 shADAR1	49675920	Alu	0.3	-	5'UTR
SPOP	MCG070 shADAR1	49675938	Alu	0.272727	-	5'UTR
SYTL4	MCG070 shADAR1	100703142	Alu	0.166667	-	5'UTR
ABHD12	MCG070 shADAR1	25306490	Alu	0.666667	-	Intron
AC105052.1	MCG070 shADAR1	102626316	Alu	0.25	-	Intron
ADAR	MCG070 shADAR1	154600606	Alu	0.181818	-	Intron
ADPGK	MCG070 shADAR1	72780624	Alu	0.222222	-	Intron
ADPGK	MCG070 shADAR1	72780687	Alu	0.333333	-	Intron
ALOX12P2	MCG070 shADAR1	6910896	Alu	0.8	+	Intron
ALOX12P2	MCG070 shADAR1	6911017	Alu	0.2	+	Intron
ALOX12P2	MCG070 shADAR1	6911029	Alu	0.4	+	Intron
AMBRA1	MCG070 shADAR1	46479645	Alu	0.4	-	Intron
AMPD3	MCG070 shADAR1	10457675	Alu	0.333333	+	Intron
AMPD3	MCG070 shADAR1	10457758	Alu	0.166667	+	Intron
ANAPC16	MCG070 shADAR1	72221913	Alu	0.333333	+	Intron
ANAPC7	MCG070 shADAR1	110402606	Alu	0.153846	-	Intron
ANKRD10	MCG070 shADAR1	110897383	Alu	0.4	-	Intron
ANKRD10	MCG070 shADAR1	110898976	Alu	0.333333	-	Intron
AP2A1	MCG070 shADAR1	49771119	Alu	0.5	+	Intron
APOLD1	MCG070 shADAR1	12728150	Alu	0.428571	+	Intron
ARHGAP39	MCG070 shADAR1	144605185	Alu	1	-	Intron
ARHGEF2	MCG070 shADAR1	155972903	Alu	0.666667	-	Intron
ARHGEF2	MCG070 shADAR1	155972972	Alu	0.571429	-	Intron
ARHGEF3	MCG070 shADAR1	56739493	Alu	0.285714	-	Intron
ARHGEF3	MCG070 shADAR1	56739503	Alu	0.285714	-	Intron
ATF7IP2	MCG070 shADAR1	10393148	Alu	0.333333	+	Intron
ATP2A3	MCG070 shADAR1	3934796	Alu	0.375	-	Intron
BCL7C	MCG070 shADAR1	30852629	Alu	0.285714	-	Intron
BCL7C	MCG070 shADAR1	30852630	Alu	0.285714	-	Intron
BCL7C	MCG070 shADAR1	30869701	Alu	1	-	Intron
BCL7C	MCG070 shADAR1	30880254	Alu	0.222222	-	Intron
C12orf66	MCG070 shADAR1	64191815	Alu	0.4	-	Intron
C16orf74	MCG070 shADAR1	85722122	Alu	0.666667	-	Intron
C6orf62	MCG070 shADAR1	24710363	Alu	0.222222	-	Intron
C6orf62	MCG070 shADAR1	24710897	Alu	0.222222	-	Intron
CACNB1	MCG070 shADAR1	39179171	Alu	0.133333	-	Intron
CACNB1	MCG070 shADAR1	39179181	Alu	0.133333	-	Intron
CACNG8	MCG070 shADAR1	53970785	Alu	0.5	+	Intron
CACNG8	MCG070 shADAR1	53970811	Alu	0.4	+	Intron
CAMK2G	MCG070 shADAR1	73843232	Alu	0.222222	-	Intron
CAMK2G	MCG070 shADAR1	73843243	Alu	0.25	-	Intron
CAPN15	MCG070 shADAR1	532161	Alu	0.4	+	Intron
CCDC124	MCG070 shADAR1	17934331	Alu	1	+	Intron
CCDC124	MCG070 shADAR1	17934338	Alu	0.666667	+	Intron
CCDC25	MCG070 shADAR1	27764423	Alu	0.4	-	Intron
CCDC57	MCG070 shADAR1	82123225	Alu	0.214286	-	Intron
CCND3	MCG070 shADAR1	42037035	Alu	0.285714	-	Intron
CCS	MCG070 shADAR1	66594551	Alu	0.6	+	Intron
CDC123	MCG070 shADAR1	12245923	Alu	0.8	+	Intron
CEP70	MCG070 shADAR1	138500053	Alu	0.352941	-	Intron
CHAF1A	MCG070 shADAR1	4412397	Alu	0.8	+	Intron
CHFR	MCG070 shADAR1	132866951	Alu	0.4	-	Intron
CLASP2	MCG070 shADAR1	33548892	Alu	0.25	-	Intron
CLASP2	MCG070 shADAR1	33548906	Alu	0.25	-	Intron
CLCC1	MCG070 shADAR1	108936273	Alu	0.4	-	Intron
CLCN3	MCG070 shADAR1	169644441	Alu	0.166667	+	Intron
CLCN3	MCG070 shADAR1	169644456	Alu	0.363636	+	Intron
CLCN7	MCG070 shADAR1	1472395	Alu	0.375	-	Intron
CLNS1A	MCG070 shADAR1	77617285	Alu	0.5	-	Intron
COMT	MCG070 shADAR1	19948397	Alu	0.428571	+	Intron
COMT	MCG070 shADAR1	19948513	Alu	0.6	+	Intron
COMT	MCG070 shADAR1	19958232	Alu	0.8	+	Intron
COQ5	MCG070 shADAR1	120527220	Alu	0.666667	-	Intron
COQ5	MCG070 shADAR1	120527221	Alu	0.666667	-	Intron
COQ5	MCG070 shADAR1	120527354	Alu	0.6	-	Intron
COQ5	MCG070 shADAR1	120527360	Alu	0.6	-	Intron
COX11	MCG070 shADAR1	54952367	Alu	0.222222	-	Intron
COX11	MCG070 shADAR1	54952381	Alu	0.222222	-	Intron
COX11	MCG070 shADAR1	54952435	Alu	0.285714	-	Intron
CRYZL1	MCG070 shADAR1	33591889	Alu	0.375	-	Intron
CRYZL1	MCG070 shADAR1	33591895	Alu	1	-	Intron
CYBA	MCG070 shADAR1	88649076	Alu	0.285714	-	Intron
CYP2R1	MCG070 shADAR1	14890685	Alu	0.733333	-	Intron
CYP2R1	MCG070 shADAR1	14890721	Alu	0.173913	-	Intron
CYP2R1	MCG070 shADAR1	14890785	Alu	0.18	-	Intron
DAP3	MCG070 shADAR1	155689725	Alu	0.25	+	Intron
DAP3	MCG070 shADAR1	155689726	Alu	0.25	+	Intron
DAP3	MCG070 shADAR1	155734266	Alu	0.8	+	Intron
DAP3	MCG070 shADAR1	155736456	Alu	0.25	+	Intron
DAP3	MCG070 shADAR1	155736479	Alu	0.285714	+	Intron
DAP3	MCG070 shADAR1	155736493	Alu	0.285714	+	Intron
DDB2	MCG070 shADAR1	47230999	Alu	0.5	+	Intron
DENND1A	MCG070 shADAR1	123385261	Alu	0.333333	-	Intron
DGKA	MCG070 shADAR1	55943369	Alu	0.166667	+	Intron
DHRS7B	MCG070 shADAR1	21140229	Alu	0.375	+	Intron
DHX33	MCG070 shADAR1	5462078	Alu	0.6	-	Intron
DNAJC7	MCG070 shADAR1	41984930	Alu	0.3	-	Intron
DPY19L2	MCG070 shADAR1	63588918	Alu	0.5	-	Intron
DUOX1	MCG070 shADAR1	45155331	Alu	0.6	+	Intron
EIF4G3	MCG070 shADAR1	21158300	Alu	0.4	-	Intron
EMB	MCG070 shADAR1	50414307	Alu	0.285714	-	Intron
EMB	MCG070 shADAR1	50414403	Alu	0.384615	-	Intron
EMB	MCG070 shADAR1	50414431	Alu	0.181818	-	Intron
ENDOV	MCG070 shADAR1	80416073	Alu	0.133333	+	Intron
ENDOV	MCG070 shADAR1	80416087	Alu	0.153846	+	Intron
ENDOV	MCG070 shADAR1	80416116	Alu	0.25	+	Intron
ENDOV	MCG070 shADAR1	80417029	Alu	0.75	+	Intron
ENOSF1	MCG070 shADAR1	682625	Alu	0.3	-	Intron
ENOSF1	MCG070 shADAR1	691474	Alu	0.375	-	Intron
ENOSF1	MCG070 shADAR1	691500	Alu	0.777778	-	Intron
ENOSF1	MCG070 shADAR1	691566	Alu	1	-	Intron
ENOSF1	MCG070 shADAR1	691578	Alu	0.333333	-	Intron
ENSA	MCG070 shADAR1	150614021	Alu	0.25	-	Intron
ENSA	MCG070 shADAR1	150614905	Alu	0.128205	-	Intron
ENSA	MCG070 shADAR1	150615103	Alu	0.347826	-	Intron
FADS2	MCG070 shADAR1	61849848	Alu	0.416667	+	Intron
FADS2	MCG070 shADAR1	61849884	Alu	0.375	+	Intron
FAM13B	MCG070 shADAR1	137982309	Alu	0.222222	-	Intron
FAM168B	MCG070 shADAR1	131089049	Alu	0.285714	-	Intron
FBF1	MCG070 shADAR1	75940455	Alu	0.363636	-	Intron
FBXL12	MCG070 shADAR1	9812201	Alu	0.571429	-	Intron
FBXL12	MCG070 shADAR1	9812312	Alu	0.5	-	Intron
FBXL12	MCG070 shADAR1	9812365	Alu	0.375	-	Intron
FBXO31	MCG070 shADAR1	87356057	Alu	0.4	-	Intron
FIS1	MCG070 shADAR1	101241877	Alu	0.714286	-	Intron
FLT3	MCG070 shADAR1	28005167	Alu	1	-	Intron
FNBP1	MCG070 shADAR1	129909748	Alu	0.666667	-	Intron
FTX	MCG070 shADAR1	74252368	Alu	0.133333	-	Intron
FTX	MCG070 shADAR1	74265339	Alu	0.4	-	Intron
FTX	MCG070 shADAR1	74265340	Alu	0.4	-	Intron
FTX	MCG070 shADAR1	74266318	Alu	0.4	-	Intron
FTX	MCG070 shADAR1	74266411	Alu	0.8	-	Intron
GALNT2	MCG070 shADAR1	230253028	Alu	0.25	+	Intron
GALNT2	MCG070 shADAR1	230253031	Alu	0.25	+	Intron
GDF1	MCG070 shADAR1	18881421	Alu	0.5	-	Intron
GGA1	MCG070 shADAR1	37626929	Alu	0.571429	+	Intron
GGA1	MCG070 shADAR1	37626933	Alu	0.285714	+	Intron
GK5	MCG070 shADAR1	142184829	Alu	0.666667	-	Intron
GLRX3	MCG070 shADAR1	130149322	Alu	0.571429	+	Intron
GLS	MCG070 shADAR1	190945479	Alu	0.4	+	Intron
GNB1	MCG070 shADAR1	1874312	Alu	0.157895	-	Intron
GNB1	MCG070 shADAR1	1874495	Alu	0.266667	-	Intron
GPR153	MCG070 shADAR1	6255790	Alu	0.571429	-	Intron
GPR153	MCG070 shADAR1	6255817	Alu	1	-	Intron
GRAMD4	MCG070 shADAR1	46580759	Alu	0.6	+	Intron
GRAMD4	MCG070 shADAR1	46580764	Alu	0.6	+	Intron
GRB2	MCG070 shADAR1	75356408	Alu	0.272727	-	Intron
GRB2	MCG070 shADAR1	75356426	Alu	0.3	-	Intron
GRIPAP1	MCG070 shADAR1	48977421	Alu	0.4	-	Intron
GRIPAP1	MCG070 shADAR1	48977433	Alu	0.4	-	Intron
GRK4	MCG070 shADAR1	3029034	Alu	0.4	+	Intron
GUCA1B	MCG070 shADAR1	42192191	Alu	0.181818	-	Intron
GUCA1B	MCG070 shADAR1	42192197	Alu	0.181818	-	Intron
HERC2P9	MCG070 shADAR1	28591369	Alu	0.4	+	Intron
HERC4	MCG070 shADAR1	68070474	Alu	0.4	-	Intron
HMG20A	MCG070 shADAR1	77480217	Alu	0.285714	+	Intron
HSF1	MCG070 shADAR1	144292777	Alu	0.236364	+	Intron
HSF1	MCG070 shADAR1	144298341	Alu	0.5	+	Intron
HSPB11	MCG070 shADAR1	53922223	Alu	0.285714	-	Intron
IMMP1L	MCG070 shADAR1	31444769	Alu	0.3	-	Intron
IMPAD1	MCG070 shADAR1	56964395	Alu	0.25	-	Intron
ITFG2	MCG070 shADAR1	2818784	Alu	0.25	+	Intron
ITGAL	MCG070 shADAR1	30477424	Alu	0.25	+	Intron
ITGAL	MCG070 shADAR1	30477426	Alu	0.25	+	Intron
JPX	MCG070 shADAR1	73999009	Alu	0.214286	+	Intron
JPX	MCG070 shADAR1	73999036	Alu	0.2	+	Intron
JPX	MCG070 shADAR1	73999051	Alu	0.25	+	Intron
JPX	MCG070 shADAR1	73999130	Alu	0.133333	+	Intron
KANSL1	MCG070 shADAR1	46156847	Alu	0.6	-	Intron
KAT6B	MCG070 shADAR1	74871469	Alu	0.6	+	Intron
KAT8	MCG070 shADAR1	31121851	Alu	0.4	+	Intron
KAT8	MCG070 shADAR1	31121852	Alu	0.4	+	Intron
KCNJ4	MCG070 shADAR1	38445611	Alu	0.333333	-	Intron
KCNJ4	MCG070 shADAR1	38445616	Alu	0.333333	-	Intron
KCTD1	MCG070 shADAR1	26581530	Alu	0.333333	-	Intron
KCTD1	MCG070 shADAR1	26581553	Alu	0.333333	-	Intron
KCTD13	MCG070 shADAR1	29907593	Alu	0.6	-	Intron
KCTD3	MCG070 shADAR1	215581099	Alu	0.166667	+	Intron
KCTD3	MCG070 shADAR1	215581126	Alu	0.142857	+	Intron
KIFC3	MCG070 shADAR1	57792718	Alu	0.222222	-	Intron
KLHL22	MCG070 shADAR1	20446033	Alu	0.25	-	Intron
KLHL22	MCG070 shADAR1	20446034	Alu	0.25	-	Intron
KLHL22	MCG070 shADAR1	20481768	Alu	0.333333	-	Intron
KLHL22	MCG070 shADAR1	20481774	Alu	0.333333	-	Intron
KPNA6	MCG070 shADAR1	32143420	Alu	0.8	+	Intron
LAMP2	MCG070 shADAR1	120437994	Alu	0.181818	-	Intron
LAT	MCG070 shADAR1	28987094	Alu	0.8	+	Intron
LCK	MCG070 shADAR1	32281132	Alu	0.25	+	Intron
LCK	MCG070 shADAR1	32281159	Alu	0.375	+	Intron
LDLRAD4	MCG070 shADAR1	13476503	Alu	0.227273	+	Intron
LDLRAD4	MCG070 shADAR1	13557039	Alu	0.5	+	Intron
LIMK2	MCG070 shADAR1	31261647	Alu	0.2	+	Intron
LIMK2	MCG070 shADAR1	31261648	Alu	0.2	+	Intron
LINC00426	MCG070 shADAR1	30357182	Alu	0.285714	-	Intron
LINC00426	MCG070 shADAR1	30366557	Alu	0.285714	-	Intron
LINC00426	MCG070 shADAR1	30368341	Alu	0.2	-	Intron
LYRM9	MCG070 shADAR1	27889472	Alu	0.4	-	Intron
MAP3K12	MCG070 shADAR1	53494911	Alu	0.428571	-	Intron
MAP3K12	MCG070 shADAR1	53494915	Alu	0.428571	-	Intron
MAP3K5	MCG070 shADAR1	136634848	Alu	0.4	-	Intron
MARK3	MCG070 shADAR1	103408305	Alu	0.3	+	Intron
MARK3	MCG070 shADAR1	103484691	Alu	0.8	+	Intron
MARK3	MCG070 shADAR1	103485415	Alu	0.333333	+	Intron
MARK3	MCG070 shADAR1	103485419	Alu	0.333333	+	Intron
MBD3	MCG070 shADAR1	1586611	Alu	0.333333	-	Intron
MBD3	MCG070 shADAR1	1586625	Alu	0.333333	-	Intron
MBD3	MCG070 shADAR1	1586934	Alu	0.25	-	Intron
MBD3	MCG070 shADAR1	1587614	Alu	0.384615	-	Intron
MBD3	MCG070 shADAR1	1588602	Alu	0.166667	-	Intron
METTL21A	MCG070 shADAR1	207612273	Alu	0.285714	-	Intron
METTL6	MCG070 shADAR1	15410395	Alu	0.375	-	Intron
MNT	MCG070 shADAR1	2391185	Alu	0.285714	-	Intron
MON2	MCG070 shADAR1	62559402	Alu	0.375	+	Intron
MON2	MCG070 shADAR1	62559472	Alu	0.5	+	Intron
MON2	MCG070 shADAR1	62559540	Alu	0.5	+	Intron
MORN1	MCG070 shADAR1	2370770	Alu	1	-	Intron
MORN1	MCG070 shADAR1	2370825	Alu	0.272727	-	Intron
MORN1	MCG070 shADAR1	2370830	Alu	0.818182	-	Intron
MORN1	MCG070 shADAR1	2370909	Alu	0.25	-	Intron
MPG	MCG070 shADAR1	83607	Alu	0.2	+	Intron
MPG	MCG070 shADAR1	83621	Alu	0.2	+	Intron
MPV17	MCG070 shADAR1	27318490	Alu	0.285714	-	Intron
MPV17	MCG070 shADAR1	27318495	Alu	0.285714	-	Intron
MRPL12	MCG070 shADAR1	81705056	Alu	0.4	+	Intron
MRPL12	MCG070 shADAR1	81705298	Alu	0.75	+	Intron
MTG2	MCG070 shADAR1	62189194	Alu	0.333333	+	Intron
MTIF2	MCG070 shADAR1	55266443	Alu	0.222222	-	Intron
MYB	MCG070 shADAR1	135209486	Alu	0.188889	+	Intron
MYB	MCG070 shADAR1	135213640	Alu	0.142857	+	Intron
NAA60	MCG070 shADAR1	3461924	Alu	0.285714	+	Intron
NAA60	MCG070 shADAR1	3461925	Alu	0.285714	+	Intron
NARF	MCG070 shADAR1	82483239	Alu	0.294118	+	Intron
NDE1	MCG070 shADAR1	15700607	Alu	0.461538	+	Intron
NDE1	MCG070 shADAR1	15701100	Alu	0.263158	+	Intron
NDUFB1	MCG070 shADAR1	92118922	Alu	0.416667	-	Intron
NDUFB7	MCG070 shADAR1	14571378	Alu	0.428571	-	Intron
NDUFB7	MCG070 shADAR1	14571379	Alu	0.285714	-	Intron
NEIL1	MCG070 shADAR1	75353021	Alu	0.6	+	Intron
NMRK1	MCG070 shADAR1	75080495	Alu	0.4	-	Intron
NMT1	MCG070 shADAR1	45100742	Alu	0.285714	+	Intron
NMT1	MCG070 shADAR1	45100769	Alu	0.636364	+	Intron
NRROS	MCG070 shADAR1	196641347	Alu	0.125	+	Intron
NT5C2	MCG070 shADAR1	103142634	Alu	0.2	-	Intron
NT5C2	MCG070 shADAR1	103142654	Alu	0.222222	-	Intron
OBSCN	MCG070 shADAR1	228260539	Alu	0.333333	+	Intron
OBSCN	MCG070 shADAR1	228260579	Alu	0.3	+	Intron
OPA3	MCG070 shADAR1	45549573	Alu	0.4	-	Intron
OPA3	MCG070 shADAR1	45549673	Alu	0.375	-	Intron
OSBPL1A	MCG070 shADAR1	24347693	Alu	0.333333	-	Intron
OSBPL1A	MCG070 shADAR1	24347730	Alu	0.2	-	Intron
OSBPL1A	MCG070 shADAR1	24363584	Alu	0.714286	-	Intron
OSBPL1A	MCG070 shADAR1	24363585	Alu	0.714286	-	Intron
OSBPL1A	MCG070 shADAR1	24363744	Alu	0.7	-	Intron
OSBPL1A	MCG070 shADAR1	24363780	Alu	0.666667	-	Intron
OSBPL1A	MCG070 shADAR1	24363837	Alu	0.4	-	Intron
PAM16	MCG070 shADAR1	4348723	Alu	0.4	-	Intron
PAM16	MCG070 shADAR1	4348752	Alu	0.6	-	Intron
PCSK6	MCG070 shADAR1	101362095	Alu	0.714286	-	Intron
PCSK7	MCG070 shADAR1	117212821	Alu	0.25	-	Intron
PCSK7	MCG070 shADAR1	117214053	Alu	0.5	-	Intron
PCSK7	MCG070 shADAR1	117215929	Alu	0.181818	-	Intron
PCYOX1	MCG070 shADAR1	70268692	Alu	0.4	+	Intron
PGS1	MCG070 shADAR1	78422615	Alu	0.2	+	Intron
PGS1	MCG070 shADAR1	78422639	Alu	0.875	+	Intron
PIN1	MCG070 shADAR1	9839170	Alu	0.5	+	Intron
PLEKHA8P1	MCG070 shADAR1	45175221	Alu	0.285714	-	Intron
PLLP	MCG070 shADAR1	57282375	Alu	0.4	-	Intron
POGZ	MCG070 shADAR1	151446704	Alu	0.25	-	Intron
POLR2J2	MCG070 shADAR1	102664506	Alu	0.214286	-	Intron
POLR2J3	MCG070 shADAR1	102548098	Alu	0.4	-	Intron
POLR2J3	MCG070 shADAR1	102550624	Alu	0.6	-	Intron
POLR2J3	MCG070 shADAR1	102566138	Alu	0.285714	-	Intron
PPARA	MCG070 shADAR1	46152860	Alu	0.166667	+	Intron
PPCDC	MCG070 shADAR1	75035846	Alu	0.4	+	Intron
PPCDC	MCG070 shADAR1	75035847	Alu	1	+	Intron
PPIL3	MCG070 shADAR1	200888677	Alu	0.4	-	Intron
PPIL3	MCG070 shADAR1	200888690	Alu	0.4	-	Intron
PPP1R12A	MCG070 shADAR1	79799896	Alu	0.4	-	Intron
PPP1R12A	MCG070 shADAR1	79799900	Alu	0.4	-	Intron
PPP1R37	MCG070 shADAR1	45095316	Alu	0.285714	+	Intron
PPP1R37	MCG070 shADAR1	45095319	Alu	0.285714	+	Intron
PPP1R37	MCG070 shADAR1	45095359	Alu	0.285714	+	Intron
PPP1R37	MCG070 shADAR1	45095642	Alu	0.307692	+	Intron
PPP2R1A	MCG070 shADAR1	52193670	Alu	0.6	+	Intron
PPP2R1A	MCG070 shADAR1	52193703	Alu	0.8	+	Intron
PPP2R1A	MCG070 shADAR1	52193750	Alu	0.833333	+	Intron
PPP6R2	MCG070 shADAR1	50376199	Alu	0.333333	+	Intron
PPP6R2	MCG070 shADAR1	50376200	Alu	0.333333	+	Intron
PPP6R2	MCG070 shADAR1	50394413	Alu	0.875	+	Intron
PPP6R2	MCG070 shADAR1	50394759	Alu	0.2	+	Intron
PPRC1	MCG070 shADAR1	102145358	Alu	0.4	+	Intron
PRKD2	MCG070 shADAR1	46708533	Alu	0.5	-	Intron
PRKRA	MCG070 shADAR1	178446152	Alu	0.5	-	Intron
PSMA1	MCG070 shADAR1	14552994	Alu	0.5	-	Intron
PSMA1	MCG070 shADAR1	14553067	Alu	1	-	Intron
PTEN	MCG070 shADAR1	87940182	Alu	0.153846	+	Intron
PUM1	MCG070 shADAR1	30985402	Alu	0.5	-	Intron
PXMP2	MCG070 shADAR1	132701821	Alu	0.333333	+	Intron
PXMP2	MCG070 shADAR1	132701908	Alu	0.333333	+	Intron
PXMP2	MCG070 shADAR1	132701943	Alu	0.25	+	Intron
R3HDM2	MCG070 shADAR1	57421316	Alu	0.4	-	Intron
R3HDM2	MCG070 shADAR1	57421333	Alu	0.4	-	Intron
R3HDM2	MCG070 shADAR1	57421605	Alu	0.272727	-	Intron
R3HDM2	MCG070 shADAR1	57421645	Alu	0.133333	-	Intron
R3HDM2	MCG070 shADAR1	57421785	Alu	0.166667	-	Intron
R3HDM2	MCG070 shADAR1	57421930	Alu	0.5	-	Intron
RAB10	MCG070 shADAR1	26126494	Alu	0.4	+	Intron
RAB11FIP3	MCG070 shADAR1	498440	Alu	0.333333	+	Intron
RAB11FIP3	MCG070 shADAR1	498676	Alu	0.555556	+	Intron
RAB11FIP3	MCG070 shADAR1	499091	Alu	0.333333	+	Intron
RAB11FIP3	MCG070 shADAR1	499101	Alu	0.333333	+	Intron
RAB11FIP3	MCG070 shADAR1	499677	Alu	0.419355	+	Intron
RAB11FIP3	MCG070 shADAR1	499678	Alu	0.3125	+	Intron
RAB11FIP3	MCG070 shADAR1	500567	Alu	0.37931	+	Intron
RAB40B	MCG070 shADAR1	82695329	Alu	0.4	-	Intron
RAB40B	MCG070 shADAR1	82695374	Alu	0.222222	-	Intron
RAB40B	MCG070 shADAR1	82695593	Alu	0.5	-	Intron
RABEPK	MCG070 shADAR1	125203933	Alu	0.4	+	Intron
RACK1	MCG070 shADAR1	181242715	Alu	0.222222	-	Intron
RBBP4	MCG070 shADAR1	32675940	Alu	0.428571	+	Intron
RBBP4	MCG070 shADAR1	32678825	Alu	0.6	+	Intron
RBM34	MCG070 shADAR1	235150142	Alu	0.166667	-	Intron
RBM34	MCG070 shADAR1	235150157	Alu	0.214286	-	Intron
RBM34	MCG070 shADAR1	235150190	Alu	0.181818	-	Intron
RBM34	MCG070 shADAR1	235150212	Alu	0.285714	-	Intron
RBM39	MCG070 shADAR1	35713270	Alu	0.141176	-	Intron
RBM5	MCG070 shADAR1	50113054	Alu	0.6	+	Intron
RBM5	MCG070 shADAR1	50113122	Alu	0.8	+	Intron
RBM6	MCG070 shADAR1	50001254	Alu	0.4	+	Intron
RCC1	MCG070 shADAR1	28510360	Alu	0.428571	+	Intron
RCC1	MCG070 shADAR1	28510383	Alu	0.25	+	Intron
RHBDL3	MCG070 shADAR1	32308321	Alu	0.4	+	Intron
RHOH	MCG070 shADAR1	40235705	Alu	0.8	+	Intron
RIC3	MCG070 shADAR1	8128919	Alu	0.142857	-	Intron
RIC3	MCG070 shADAR1	8128923	Alu	0.133333	-	Intron
RILPL1	MCG070 shADAR1	123517649	Alu	0.9375	-	Intron
RILPL1	MCG070 shADAR1	123517659	Alu	0.210526	-	Intron
RILPL1	MCG070 shADAR1	123518385	Alu	0.454545	-	Intron
RILPL1	MCG070 shADAR1	123518423	Alu	0.142857	-	Intron
RNF115	MCG070 shADAR1	145794090	Alu	0.153846	-	Intron
RPS20	MCG070 shADAR1	56070553	Alu	0.333333	-	Intron
SART1	MCG070 shADAR1	65974101	Alu	0.133333	+	Intron
SCAMP2	MCG070 shADAR1	74848310	Alu	0.285714	-	Intron
SCAMP2	MCG070 shADAR1	74848335	Alu	0.285714	-	Intron
SCYL1	MCG070 shADAR1	65533212	Alu	0.25	+	Intron
SEC62	MCG070 shADAR1	169973483	Alu	0.4	+	Intron
SENP5	MCG070 shADAR1	196904678	Alu	0.8	+	Intron
2022-09-02	MCG070 shADAR1	241336887	Alu	0.25	+	Intron
SGSM3	MCG070 shADAR1	40377761	Alu	0.333333	+	Intron
SHARPIN	MCG070 shADAR1	144102189	Alu	0.285714	-	Intron
SLC11A2	MCG070 shADAR1	50980490	Alu	0.166667	-	Intron
SLC12A6	MCG070 shADAR1	34300711	Alu	0.428571	-	Intron
SLC12A6	MCG070 shADAR1	34300745	Alu	0.5	-	Intron
SLC12A6	MCG070 shADAR1	34300765	Alu	0.4	-	Intron
SLC16A5	MCG070 shADAR1	75104577	Alu	0.285714	+	Intron
SLC16A5	MCG070 shADAR1	75104581	Alu	0.285714	+	Intron
SLC20A2	MCG070 shADAR1	42530992	Alu	0.8	-	Intron
SLC4A8	MCG070 shADAR1	51449307	Alu	0.5	+	Intron
SLC4A8	MCG070 shADAR1	51449309	Alu	0.5	+	Intron
SMARCA4	MCG070 shADAR1	10963191	Alu	0.25	+	Intron
SMIM7	MCG070 shADAR1	16652483	Alu	0.333333	-	Intron
SNF8	MCG070 shADAR1	48934571	Alu	0.285714	-	Intron
SNX5	MCG070 shADAR1	17962342	Alu	0.55	-	Intron
SOBP	MCG070 shADAR1	107649048	Alu	0.375	+	Intron
SPTLC1	MCG070 shADAR1	92079367	Alu	0.166667	-	Intron
SREBF2	MCG070 shADAR1	41879052	Alu	0.6	+	Intron
STAG1	MCG070 shADAR1	136511009	Alu	0.277778	-	Intron
STIM1	MCG070 shADAR1	3903944	Alu	0.6	+	Intron
STKLD1	MCG070 shADAR1	133384278	Alu	0.166667	+	Intron
STKLD1	MCG070 shADAR1	133384314	Alu	0.153846	+	Intron
STKLD1	MCG070 shADAR1	133384326	Alu	0.166667	+	Intron
STON1-GTF2A1L	MCG070 shADAR1	48604084	Alu	0.47619	+	Intron
STON1-GTF2A1L	MCG070 shADAR1	48604086	Alu	0.714286	+	Intron
STON1-GTF2A1L	MCG070 shADAR1	48604128	Alu	0.363636	+	Intron
STON1-GTF2A1L	MCG070 shADAR1	48604208	Alu	0.235294	+	Intron
STX2	MCG070 shADAR1	130802315	Alu	0.2	-	Intron
STX2	MCG070 shADAR1	130802336	Alu	0.526316	-	Intron
STX2	MCG070 shADAR1	130802380	Alu	0.5	-	Intron
STX2	MCG070 shADAR1	130802435	Alu	0.269231	-	Intron
STX2	MCG070 shADAR1	130802746	Alu	0.285714	-	Intron
STX5	MCG070 shADAR1	62808223	Alu	0.333333	-	Intron
SUZ12P1	MCG070 shADAR1	30714032	Alu	0.2	+	Intron
SUZ12P1	MCG070 shADAR1	30720644	Alu	0.444444	+	Intron
SYMPK	MCG070 shADAR1	45859598	Alu	0.428571	-	Intron
SYMPK	MCG070 shADAR1	45859683	Alu	0.428571	-	Intron
SYMPK	MCG070 shADAR1	45859711	Alu	0.4	-	Intron
TAF15	MCG070 shADAR1	35827256	Alu	0.428571	+	Intron
TAF15	MCG070 shADAR1	35827585	Alu	0.3	+	Intron
TAF15	MCG070 shADAR1	35827586	Alu	0.3	+	Intron
TAF8	MCG070 shADAR1	42057678	Alu	0.325581	+	Intron
TARDBP	MCG070 shADAR1	11021734	Alu	0.166667	+	Intron
TAZ	MCG070 shADAR1	154414735	Alu	0.428571	+	Intron
TBP	MCG070 shADAR1	170568978	Alu	0.4	+	Intron
TBP	MCG070 shADAR1	170569002	Alu	0.285714	+	Intron
TCF12	MCG070 shADAR1	57294171	Alu	0.4	+	Intron
TCF7	MCG070 shADAR1	134137168	Alu	0.333333	+	Intron
TFCP2	MCG070 shADAR1	51141734	Alu	0.4	-	Intron
TFCP2	MCG070 shADAR1	51141737	Alu	0.4	-	Intron
TGIF2	MCG070 shADAR1	36580550	Alu	0.166667	+	Intron
TGIF2	MCG070 shADAR1	36580570	Alu	0.2	+	Intron
TIA1	MCG070 shADAR1	70217348	Alu	0.333333	-	Intron
TMEM165	MCG070 shADAR1	55412229	Alu	1	+	Intron
TMEM165	MCG070 shADAR1	55412235	Alu	0.6	+	Intron
TMEM168	MCG070 shADAR1	112787925	Alu	0.333333	-	Intron
TMEM189-UBE2V1	MCG070 shADAR1	50127490	Alu	0.142857	-	Intron
TNK2	MCG070 shADAR1	195890566	Alu	1	-	Intron
TNK2	MCG070 shADAR1	195890618	Alu	0.888889	-	Intron
TNK2	MCG070 shADAR1	195890642	Alu	0.5	-	Intron
TNRC18	MCG070 shADAR1	5326584	Alu	0.545455	-	Intron
TPGS2	MCG070 shADAR1	36791787	Alu	0.333333	-	Intron
TTL	MCG070 shADAR1	112520797	Alu	0.333333	+	Intron
TULP2	MCG070 shADAR1	48881661	Alu	0.857143	-	Intron
UGDH-AS1	MCG070 shADAR1	39535470	Alu	1	+	Intron
UHRF2	MCG070 shADAR1	6488096	Alu	0.5	+	Intron
UPF3A	MCG070 shADAR1	114284122	Alu	0.285714	+	Intron
UPF3A	MCG070 shADAR1	114284241	Alu	0.266667	+	Intron
UPF3A	MCG070 shADAR1	114284283	Alu	0.647059	+	Intron
UPF3B	MCG070 shADAR1	119822889	Alu	0.428571	-	Intron
URGCP	MCG070 shADAR1	43910756	Alu	0.8	-	Intron
YY1	MCG070 shADAR1	100243531	Alu	0.5	+	Intron
ZBTB8OS	MCG070 shADAR1	32633325	Alu	0.583333	-	Intron
ZNF251	MCG070 shADAR1	144750982	Alu	0.4	-	Intron
ZNF251	MCG070 shADAR1	144750987	Alu	0.4	-	Intron
ZNF43	MCG070 shADAR1	21823950	Alu	0.857143	-	Intron
ZNF43	MCG070 shADAR1	21824014	Alu	0.625	-	Intron
ZNF43	MCG070 shADAR1	21824148	Alu	0.666667	-	Intron
ZNF559-ZNF177	MCG070 shADAR1	9354207	Alu	0.4	+	Intron
ZNF559-ZNF177	MCG070 shADAR1	9354217	Alu	0.4	+	Intron
ZNF581	MCG070 shADAR1	55638871	Alu	0.4	+	Intron
ZNF581	MCG070 shADAR1	55638885	Alu	0.4	+	Intron
ZNF581	MCG070 shADAR1	55638920	Alu	0.4	+	Intron
ZNF581	MCG070 shADAR1	55638925	Alu	0.4	+	Intron
ZNF587	MCG070 shADAR1	57853945	Alu	0.285714	+	Intron
ZNF589	MCG070 shADAR1	48255659	Alu	0.333333	+	Intron
ZNF623	MCG070 shADAR1	143640821	Alu	0.333333	+	Intron
ZNF623	MCG070 shADAR1	143644755	Alu	0.4	+	Intron
ZNF623	MCG070 shADAR1	143644964	Alu	0.6	+	Intron
ZNF652	MCG070 shADAR1	49339953	Alu	0.5	-	Intron
ZNF652	MCG070 shADAR1	49339990	Alu	0.333333	-	Intron
ZNF730	MCG070 shADAR1	23101750	Alu	0.153846	+	Intron
ZNF730	MCG070 shADAR1	23102693	Alu	0.277778	+	Intron
ZNF736	MCG070 shADAR1	64337944	Alu	0.8	+	Intron
ZNF761	MCG070 shADAR1	53449789	Alu	0.285714	+	Intron
ZNF83	MCG070 shADAR1	52618579	Alu	0.5	-	Intron
ZNF83	MCG070 shADAR1	52644861	Alu	0.4	-	Intron
ZNF84	MCG070 shADAR1	133040380	Alu	0.5	+	Intron
ZNF91	MCG070 shADAR1	23339800	Alu	0.428571	-	Intron
ZNF91	MCG070 shADAR1	23339828	Alu	1	-	Intron
ZSCAN21	MCG070 shADAR1	100051501	Alu	0.5	+	Intron
ZSCAN30	MCG070 shADAR1	35263159	Alu	0.6	-	Intron
ZSWIM7	MCG070 shADAR1	15991008	Alu	0.222222	-	Intron
NEIL1	MCG070 shADAR1	75353745	Nonalu	0.8	+	Missense_Mutation
ZNF587B	MCG070 shADAR1	57844302	Alu	0.5	+	Missense_Mutation
ABCB7	MCG070 shCTRL	75052299	Alu	0.4	-	3'UTR
ABCB7	MCG070 shCTRL	75052302	Alu	0.4	-	3'UTR
ABHD11	MCG070 shCTRL	73736377	Alu	0.166667	-	3'UTR
ADAP2	MCG070 shCTRL	30958692	Alu	0.266667	+	3'UTR
ADAP2	MCG070 shCTRL	30958708	Alu	0.307692	+	3'UTR
ADAP2	MCG070 shCTRL	30958728	Alu	0.285714	+	3'UTR
ADAT1	MCG070 shCTRL	75599337	Alu	0.2	-	3'UTR
ADGRE2	MCG070 shCTRL	14734257	Alu	0.142857	-	3'UTR
ADGRE2	MCG070 shCTRL	14734311	Alu	0.277778	-	3'UTR
ADGRE2	MCG070 shCTRL	14734702	Alu	0.6	-	3'UTR
ANAPC16	MCG070 shCTRL	72234025	Alu	0.8	+	3'UTR
ANAPC16	MCG070 shCTRL	72234934	Alu	0.5	+	3'UTR
ANAPC16	MCG070 shCTRL	72234974	Alu	0.333333	+	3'UTR
ANAPC16	MCG070 shCTRL	72235004	Alu	0.4	+	3'UTR
ANAPC16	MCG070 shCTRL	72235309	Alu	0.5	+	3'UTR
ANKRD16	MCG070 shCTRL	5862176	Alu	0.4	-	3'UTR
AP1M1	MCG070 shCTRL	16239705	Alu	0.333333	+	3'UTR
AP1S3	MCG070 shCTRL	223755707	Alu	1	-	3'UTR
AP3S2	MCG070 shCTRL	89832336	Alu	1	-	3'UTR
AP4S1	MCG070 shCTRL	31095444	Alu	0.8	+	3'UTR
AP5B1	MCG070 shCTRL	65777096	Alu	0.25	-	3'UTR
APOBEC3D	MCG070 shCTRL	39032722	Alu	1	+	3'UTR
APOBEC3D	MCG070 shCTRL	39033096	Alu	0.25	+	3'UTR
APOBEC3D	MCG070 shCTRL	39033161	Alu	0.21875	+	3'UTR
APOBEC3F	MCG070 shCTRL	39053462	Alu	0.181818	+	3'UTR
APOBEC3F	MCG070 shCTRL	39053518	Alu	0.181818	+	3'UTR
APOBEC3F	MCG070 shCTRL	39053543	Alu	0.272727	+	3'UTR
APPL1	MCG070 shCTRL	57272806	Alu	0.307692	+	3'UTR
ARIH1	MCG070 shCTRL	72590969	Alu	0.428571	+	3'UTR
ARL17A	MCG070 shCTRL	46553582	Alu	0.25	-	3'UTR
ARL17A	MCG070 shCTRL	46553609	Alu	0.4	-	3'UTR
ARPIN	MCG070 shCTRL	89897322	Alu	1	-	3'UTR
ARPIN	MCG070 shCTRL	89897337	Alu	1	-	3'UTR
ARPIN	MCG070 shCTRL	89897363	Alu	0.4	-	3'UTR
ARPIN	MCG070 shCTRL	89899222	Alu	0.6	-	3'UTR
ARPIN	MCG070 shCTRL	89899322	Alu	0.222222	-	3'UTR
ARPIN	MCG070 shCTRL	89899374	Alu	0.2	-	3'UTR
ARRDC5	MCG070 shCTRL	4890517	Alu	0.894737	-	3'UTR
ARSD	MCG070 shCTRL	2906875	Alu	0.333333	-	3'UTR
AS3MT	MCG070 shCTRL	102900897	Alu	0.4	+	3'UTR
AS3MT	MCG070 shCTRL	102900898	Alu	0.4	+	3'UTR
ATM	MCG070 shCTRL	108367261	Alu	0.428571	+	3'UTR
BDH1	MCG070 shCTRL	197511188	Alu	0.833333	-	3'UTR
BORCS5	MCG070 shCTRL	12469235	Alu	0.4	+	3'UTR
BORCS5	MCG070 shCTRL	12469236	Alu	0.4	+	3'UTR
BORCS8	MCG070 shCTRL	19177395	Alu	0.32	-	3'UTR
BPNT1	MCG070 shCTRL	220057934	Alu	0.333333	-	3'UTR
BPNT1	MCG070 shCTRL	220058621	Alu	0.5	-	3'UTR
BPNT1	MCG070 shCTRL	220058655	Alu	0.222222	-	3'UTR
BPNT1	MCG070 shCTRL	220058761	Alu	0.181818	-	3'UTR
C12orf45	MCG070 shCTRL	105017261	Alu	0.4	+	3'UTR
C15orf40	MCG070 shCTRL	83005358	Alu	0.193548	-	3'UTR
C8orf44	MCG070 shCTRL	66681039	Alu	0.4	+	3'UTR
CACNG8	MCG070 shCTRL	53984695	Alu	0.210526	+	3'UTR
CACNG8	MCG070 shCTRL	53984755	Alu	0.1875	+	3'UTR
CACNG8	MCG070 shCTRL	53985648	Alu	0.211009	+	3'UTR
CACNG8	MCG070 shCTRL	53985713	Alu	0.744444	+	3'UTR
CACNG8	MCG070 shCTRL	53988404	Alu	0.143939	+	3'UTR
CACNG8	MCG070 shCTRL	53988473	Alu	0.185714	+	3'UTR
CACNG8	MCG070 shCTRL	53988532	Alu	0.247423	+	3'UTR
CAND1	MCG070 shCTRL	67318087	Alu	0.4	+	3'UTR
CAND1	MCG070 shCTRL	67318130	Alu	0.666667	+	3'UTR
CAND1	MCG070 shCTRL	67318134	Alu	0.666667	+	3'UTR
CAND1	MCG070 shCTRL	67318198	Alu	0.166667	+	3'UTR
CASP10	MCG070 shCTRL	201217945	Alu	0.173913	+	3'UTR
CASP10	MCG070 shCTRL	201218007	Alu	0.166667	+	3'UTR
CASP10	MCG070 shCTRL	201219195	Alu	0.230769	+	3'UTR
CBFA2T2	MCG070 shCTRL	33646274	Alu	0.4	+	3'UTR
CBFA2T2	MCG070 shCTRL	33646606	Alu	0.6	+	3'UTR
CCNYL1	MCG070 shCTRL	207755018	Alu	0.272727	+	3'UTR
CCNYL1	MCG070 shCTRL	207755281	Alu	0.285714	+	3'UTR
CEP89	MCG070 shCTRL	32876213	Alu	0.5	-	3'UTR
CEP89	MCG070 shCTRL	32878239	Alu	0.375	-	3'UTR
CLN8	MCG070 shCTRL	1784086	Alu	0.272727	+	3'UTR
CLN8	MCG070 shCTRL	1784110	Alu	0.277778	+	3'UTR
CLN8	MCG070 shCTRL	1784217	Alu	0.375	+	3'UTR
COX18	MCG070 shCTRL	73057026	Alu	0.222222	-	3'UTR
CPSF2	MCG070 shCTRL	92169978	Alu	0.4	+	3'UTR
CPSF2	MCG070 shCTRL	92169979	Alu	0.4	+	3'UTR
CPT1A	MCG070 shCTRL	68755869	Alu	0.25	-	3'UTR
CPT1A	MCG070 shCTRL	68755931	Alu	0.285714	-	3'UTR
CRCP	MCG070 shCTRL	66153318	Alu	0.125	+	3'UTR
CRCP	MCG070 shCTRL	66153319	Alu	0.125	+	3'UTR
CRCP	MCG070 shCTRL	66154275	Alu	0.133333	+	3'UTR
CSNK2A1	MCG070 shCTRL	472926	Alu	0.166667	-	3'UTR
CTSS	MCG070 shCTRL	150732772	Alu	0.25	-	3'UTR
CWF19L1	MCG070 shCTRL	100232502	Alu	0.238095	-	3'UTR
CWF19L1	MCG070 shCTRL	100232668	Alu	0.146341	-	3'UTR
CXorf56	MCG070 shCTRL	119538708	Alu	0.8	-	3'UTR
CXorf56	MCG070 shCTRL	119538709	Alu	0.8	-	3'UTR
CXorf56	MCG070 shCTRL	119539365	Alu	0.45	-	3'UTR
CYP20A1	MCG070 shCTRL	203297587	Alu	0.142857	+	3'UTR
CYP20A1	MCG070 shCTRL	203297930	Alu	0.230769	+	3'UTR
CYP20A1	MCG070 shCTRL	203297942	Alu	0.230769	+	3'UTR
DBT	MCG070 shCTRL	100194308	Alu	0.142857	-	3'UTR
DCAF16	MCG070 shCTRL	17801196	Alu	0.363636	-	3'UTR
DCAF16	MCG070 shCTRL	17801266	Alu	0.5	-	3'UTR
DCLRE1C	MCG070 shCTRL	14905870	Alu	0.285714	-	3'UTR
DCLRE1C	MCG070 shCTRL	14907029	Alu	0.444444	-	3'UTR
DDX46	MCG070 shCTRL	134829704	Alu	0.1875	+	3'UTR
DFFA	MCG070 shCTRL	10457256	Alu	0.2	-	3'UTR
DFFA	MCG070 shCTRL	10457470	Alu	0.4	-	3'UTR
DFFA	MCG070 shCTRL	10459007	Alu	0.179487	-	3'UTR
DFFA	MCG070 shCTRL	10460658	Alu	0.333333	-	3'UTR
DFFA	MCG070 shCTRL	10460709	Alu	0.166667	-	3'UTR
DHFR	MCG070 shCTRL	80628054	Alu	0.25	-	3'UTR
DHTKD1	MCG070 shCTRL	12121033	Alu	0.196078	+	3'UTR
DHTKD1	MCG070 shCTRL	12121200	Alu	0.222222	+	3'UTR
DHTKD1	MCG070 shCTRL	12121574	Alu	0.2	+	3'UTR
DR1	MCG070 shCTRL	93367891	Alu	0.5	+	3'UTR
DR1	MCG070 shCTRL	93367901	Alu	0.5	+	3'UTR
DUSP18	MCG070 shCTRL	30662772	Alu	0.162162	-	3'UTR
DUSP18	MCG070 shCTRL	30662798	Alu	0.512821	-	3'UTR
DYNC1H1	MCG070 shCTRL	102054698	Alu	0.3	+	3'UTR
DYNC1H1	MCG070 shCTRL	102054892	Alu	0.666667	+	3'UTR
EIF2AK2	MCG070 shCTRL	37103922	Alu	0.25	-	3'UTR
EIF2AK2	MCG070 shCTRL	37103976	Alu	0.222222	-	3'UTR
EIF3L	MCG070 shCTRL	37889009	Alu	0.285714	+	3'UTR
EIF3M	MCG070 shCTRL	32604263	Alu	0.8	+	3'UTR
ELP2	MCG070 shCTRL	36179206	Alu	0.4	+	3'UTR
ELP2	MCG070 shCTRL	36179216	Alu	0.4	+	3'UTR
EMP2	MCG070 shCTRL	10531468	Alu	0.6	-	3'UTR
ENOSF1	MCG070 shCTRL	671150	Alu	0.133333	-	3'UTR
EXOSC6	MCG070 shCTRL	70249181	Alu	0.25	-	3'UTR
EXOSC6	MCG070 shCTRL	70249315	Alu	0.375	-	3'UTR
EXOSC6	MCG070 shCTRL	70249335	Alu	0.285714	-	3'UTR
EXOSC6	MCG070 shCTRL	70249888	Alu	0.181818	-	3'UTR
F11R	MCG070 shCTRL	160998101	Alu	0.142857	-	3'UTR
FAM118A	MCG070 shCTRL	45340986	Alu	0.333333	+	3'UTR
FAM118A	MCG070 shCTRL	45341065	Alu	0.133333	+	3'UTR
FAM177A1	MCG070 shCTRL	35082433	Alu	0.25	+	3'UTR
FAM177A1	MCG070 shCTRL	35082434	Alu	0.25	+	3'UTR
FAM200A	MCG070 shCTRL	99546467	Alu	0.25	-	3'UTR
FAM200A	MCG070 shCTRL	99546548	Alu	0.222222	-	3'UTR
FANCD2	MCG070 shCTRL	10101479	Alu	0.3125	+	3'UTR
FBXL20	MCG070 shCTRL	39255678	Alu	0.4	-	3'UTR
FYTTD1	MCG070 shCTRL	197784610	Alu	0.4	+	3'UTR
GALK1	MCG070 shCTRL	75751622	Alu	0.166667	-	3'UTR
GATC	MCG070 shCTRL	120460858	Alu	0.222222	+	3'UTR
GATC	MCG070 shCTRL	120461208	Alu	0.72	+	3'UTR
GATC	MCG070 shCTRL	120461272	Alu	0.651163	+	3'UTR
GBP4	MCG070 shCTRL	89183779	Alu	0.6	-	3'UTR
GINS1	MCG070 shCTRL	25447658	Alu	0.307692	+	3'UTR
GINS2	MCG070 shCTRL	85676803	Alu	0.5	-	3'UTR
GINS4	MCG070 shCTRL	41542129	Alu	0.21875	+	3'UTR
GINS4	MCG070 shCTRL	41542277	Alu	0.428571	+	3'UTR
GINS4	MCG070 shCTRL	41542304	Alu	0.333333	+	3'UTR
GINS4	MCG070 shCTRL	41543917	Alu	0.8	+	3'UTR
GJC1	MCG070 shCTRL	44798961	Alu	0.6	-	3'UTR
GMEB1	MCG070 shCTRL	28715343	Alu	0.166667	+	3'UTR
GMEB1	MCG070 shCTRL	28715411	Alu	0.4	+	3'UTR
GMPS	MCG070 shCTRL	155942976	Alu	0.6	+	3'UTR
GNAI3	MCG070 shCTRL	109594822	Alu	0.153846	+	3'UTR
GNAL	MCG070 shCTRL	11882484	Alu	1	+	3'UTR
GNAL	MCG070 shCTRL	11882485	Alu	1	+	3'UTR
GNL3L	MCG070 shCTRL	54560831	Alu	0.4	+	3'UTR
GNL3L	MCG070 shCTRL	54560919	Alu	0.285714	+	3'UTR
GNPNAT1	MCG070 shCTRL	52775760	Alu	0.206897	-	3'UTR
GNPNAT1	MCG070 shCTRL	52776822	Alu	0.142857	-	3'UTR
GNPNAT1	MCG070 shCTRL	52776828	Alu	0.142857	-	3'UTR
GOLGA3	MCG070 shCTRL	132770763	Alu	0.333333	-	3'UTR
GPATCH2L	MCG070 shCTRL	76205039	Alu	0.25	+	3'UTR
GPATCH2L	MCG070 shCTRL	76207051	Alu	0.214286	+	3'UTR
GPATCH2L	MCG070 shCTRL	76207066	Alu	0.4	+	3'UTR
GPN2	MCG070 shCTRL	26876397	Alu	0.230769	-	3'UTR
GSR	MCG070 shCTRL	30679086	Alu	0.241379	-	3'UTR
GTF2H3	MCG070 shCTRL	123662018	Alu	0.166667	+	3'UTR
GTF2H3	MCG070 shCTRL	123662022	Alu	0.166667	+	3'UTR
H6PD	MCG070 shCTRL	9268183	Alu	0.166667	+	3'UTR
HAUS2	MCG070 shCTRL	42567882	Alu	0.222222	+	3'UTR
HAUS2	MCG070 shCTRL	42567905	Alu	0.25	+	3'UTR
HAUS2	MCG070 shCTRL	42567937	Alu	0.333333	+	3'UTR
HEATR3	MCG070 shCTRL	50105283	Alu	0.4	+	3'UTR
HJURP	MCG070 shCTRL	233837106	Alu	0.3	-	3'UTR
HLA-DOA	MCG070 shCTRL	33005780	Alu	0.333333	-	3'UTR
HLA-DOA	MCG070 shCTRL	33005854	Alu	0.230769	-	3'UTR
HOOK3	MCG070 shCTRL	43020514	Alu	0.222222	+	3'UTR
HOOK3	MCG070 shCTRL	43020843	Alu	0.4	+	3'UTR
HOOK3	MCG070 shCTRL	43020846	Alu	0.5	+	3'UTR
HOOK3	MCG070 shCTRL	43020915	Alu	0.6	+	3'UTR
HOOK3	MCG070 shCTRL	43029837	Nonalu	0.5	+	3'UTR
IBA57	MCG070 shCTRL	228178506	Alu	0.272727	+	3'UTR
IBA57	MCG070 shCTRL	228180036	Alu	1	+	3'UTR
IBA57	MCG070 shCTRL	228180041	Alu	0.857143	+	3'UTR
ICE2	MCG070 shCTRL	60422727	Alu	0.428571	-	3'UTR
IL17RA	MCG070 shCTRL	17113247	Alu	0.473684	+	3'UTR
IL17RA	MCG070 shCTRL	17113380	Alu	0.444444	+	3'UTR
IL17RA	MCG070 shCTRL	17113383	Alu	0.185185	+	3'UTR
INIP	MCG070 shCTRL	112684353	Alu	0.375	-	3'UTR
INIP	MCG070 shCTRL	112684373	Alu	0.333333	-	3'UTR
INIP	MCG070 shCTRL	112684441	Alu	0.6	-	3'UTR
INIP	MCG070 shCTRL	112686593	Alu	0.166667	-	3'UTR
INIP	MCG070 shCTRL	112686634	Alu	0.26087	-	3'UTR
INPP5B	MCG070 shCTRL	37861912	Alu	0.428571	-	3'UTR
IPP	MCG070 shCTRL	45698787	Alu	0.428571	-	3'UTR
IPP	MCG070 shCTRL	45698811	Alu	0.857143	-	3'UTR
IPP	MCG070 shCTRL	45698863	Alu	0.25	-	3'UTR
IRAK1BP1	MCG070 shCTRL	78902656	Alu	0.666667	+	3'UTR
IRAK4	MCG070 shCTRL	43787936	Alu	0.529412	+	3'UTR
IRAK4	MCG070 shCTRL	43787946	Alu	0.4	+	3'UTR
IRAK4	MCG070 shCTRL	43787971	Alu	0.272727	+	3'UTR
KANK2	MCG070 shCTRL	11165634	Alu	0.166667	-	3'UTR
KIF1C	MCG070 shCTRL	5025000	Alu	0.333333	+	3'UTR
KIF1C	MCG070 shCTRL	5025010	Alu	0.230769	+	3'UTR
KIF1C	MCG070 shCTRL	5025068	Alu	0.428571	+	3'UTR
KIF1C	MCG070 shCTRL	5025540	Alu	0.235294	+	3'UTR
KIF1C	MCG070 shCTRL	5026566	Alu	0.151515	+	3'UTR
KIF1C	MCG070 shCTRL	5026568	Alu	0.558824	+	3'UTR
KIF1C	MCG070 shCTRL	5026659	Alu	0.176471	+	3'UTR
KIF1C	MCG070 shCTRL	5027723	Alu	0.285714	+	3'UTR
KIF1C	MCG070 shCTRL	5027724	Alu	0.428571	+	3'UTR
KLHDC2	MCG070 shCTRL	49785610	Alu	0.222222	+	3'UTR
KLHDC2	MCG070 shCTRL	49785618	Alu	0.222222	+	3'UTR
KLHL6	MCG070 shCTRL	183491340	Alu	0.166667	-	3'UTR
KLHL6	MCG070 shCTRL	183491385	Alu	0.133333	-	3'UTR
KRBA2	MCG070 shCTRL	8369024	Nonalu	0.444444	-	3'UTR
KRIT1	MCG070 shCTRL	92200453	Alu	0.153846	-	3'UTR
KRR1	MCG070 shCTRL	75496100	Alu	0.444444	-	3'UTR
KRR1	MCG070 shCTRL	75496272	Alu	0.791667	-	3'UTR
KRR1	MCG070 shCTRL	75496341	Alu	0.2	-	3'UTR
LAMTOR3	MCG070 shCTRL	99880590	Alu	0.3	-	3'UTR
LIMD1	MCG070 shCTRL	45680555	Alu	0.5	+	3'UTR
LIMD1	MCG070 shCTRL	45680563	Alu	0.142857	+	3'UTR
LIMD1	MCG070 shCTRL	45680795	Alu	0.384615	+	3'UTR
LIMD1	MCG070 shCTRL	45680808	Alu	0.333333	+	3'UTR
LIMD1	MCG070 shCTRL	45680931	Alu	0.5	+	3'UTR
LONP2	MCG070 shCTRL	48352531	Alu	0.142857	+	3'UTR
LONP2	MCG070 shCTRL	48354269	Alu	0.555556	+	3'UTR
LONP2	MCG070 shCTRL	48354443	Alu	0.222222	+	3'UTR
LONP2	MCG070 shCTRL	48354471	Alu	0.235294	+	3'UTR
LONP2	MCG070 shCTRL	48354483	Alu	0.210526	+	3'UTR
LRCH3	MCG070 shCTRL	197884379	Alu	0.555556	+	3'UTR
LRCH3	MCG070 shCTRL	197884392	Alu	0.333333	+	3'UTR
LRCH3	MCG070 shCTRL	197885396	Alu	0.444444	+	3'UTR
LRCH3	MCG070 shCTRL	197885435	Alu	0.181818	+	3'UTR
LRCH3	MCG070 shCTRL	197885522	Alu	0.307692	+	3'UTR
LRCH3	MCG070 shCTRL	197885531	Alu	0.214286	+	3'UTR
LRCH3	MCG070 shCTRL	197886260	Alu	0.5	+	3'UTR
LY6G5B	MCG070 shCTRL	31672469	Alu	0.333333	+	3'UTR
LYRM2	MCG070 shCTRL	89634886	Alu	0.225	-	3'UTR
MACC1	MCG070 shCTRL	20137902	Alu	0.6	-	3'UTR
MAGT1	MCG070 shCTRL	77827510	Alu	0.191176	-	3'UTR
MAGT1	MCG070 shCTRL	77828144	Alu	0.142857	-	3'UTR
MAGT1	MCG070 shCTRL	77828418	Alu	0.217391	-	3'UTR
MAVS	MCG070 shCTRL	3867485	Alu	0.129032	+	3'UTR
MAVS	MCG070 shCTRL	3869487	Alu	0.416667	+	3'UTR
MAVS	MCG070 shCTRL	3869496	Alu	0.25	+	3'UTR
MAVS	MCG070 shCTRL	3869544	Alu	0.266667	+	3'UTR
MAVS	MCG070 shCTRL	3869674	Alu	0.333333	+	3'UTR
MAVS	MCG070 shCTRL	3869705	Alu	0.310345	+	3'UTR
MAVS	MCG070 shCTRL	3869722	Alu	0.482759	+	3'UTR
MAVS	MCG070 shCTRL	3869744	Alu	0.540541	+	3'UTR
MAVS	MCG070 shCTRL	3869788	Alu	0.166667	+	3'UTR
MAVS	MCG070 shCTRL	3870974	Alu	0.333333	+	3'UTR
MCM4	MCG070 shCTRL	47977549	Alu	0.178295	+	3'UTR
MCPH1	MCG070 shCTRL	6643430	Alu	0.75	+	3'UTR
MCUR1	MCG070 shCTRL	13789155	Alu	0.428571	-	3'UTR
MDM2	MCG070 shCTRL	68849590	Alu	0.4	+	3'UTR
MDM2	MCG070 shCTRL	68843293	Nonalu	0.214286	+	3'UTR
MDM4	MCG070 shCTRL	204556519	Alu	0.25	+	3'UTR
MDM4	MCG070 shCTRL	204556538	Alu	0.375	+	3'UTR
MDM4	MCG070 shCTRL	204557520	Alu	0.125	+	3'UTR
MDM4	MCG070 shCTRL	204557532	Alu	0.204545	+	3'UTR
MDM4	MCG070 shCTRL	204557576	Alu	0.245283	+	3'UTR
ME2	MCG070 shCTRL	50950763	Alu	0.25	+	3'UTR
MECR	MCG070 shCTRL	29193101	Alu	0.666667	-	3'UTR
MECR	MCG070 shCTRL	29193122	Alu	0.8	-	3'UTR
MECR	MCG070 shCTRL	29193200	Alu	0.285714	-	3'UTR
MECR	MCG070 shCTRL	29193224	Alu	0.625	-	3'UTR
MED18	MCG070 shCTRL	28335065	Alu	0.4	+	3'UTR
MED18	MCG070 shCTRL	28335675	Alu	0.25	+	3'UTR
MED18	MCG070 shCTRL	28335688	Alu	0.25	+	3'UTR
MED28	MCG070 shCTRL	17627754	Alu	0.375	+	3'UTR
MED28	MCG070 shCTRL	17632313	Alu	0.4	+	3'UTR
METTL16	MCG070 shCTRL	2417161	Alu	0.2	-	3'UTR
METTL16	MCG070 shCTRL	2417212	Alu	0.142857	-	3'UTR
METTL16	MCG070 shCTRL	2417215	Alu	0.714286	-	3'UTR
METTL16	MCG070 shCTRL	2417277	Alu	0.363636	-	3'UTR
METTL16	MCG070 shCTRL	2417357	Alu	0.8	-	3'UTR
METTL2B	MCG070 shCTRL	128502689	Alu	0.411765	+	3'UTR
METTL2B	MCG070 shCTRL	128502779	Alu	0.416667	+	3'UTR
METTL2B	MCG070 shCTRL	128502787	Alu	0.272727	+	3'UTR
METTL8	MCG070 shCTRL	171323412	Alu	0.117647	-	3'UTR
MFSD13A	MCG070 shCTRL	102476282	Alu	0.333333	+	3'UTR
MGAT4A	MCG070 shCTRL	98623012	Alu	0.307692	-	3'UTR
MPHOSPH8	MCG070 shCTRL	19672935	Alu	0.170213	+	3'UTR
MPHOSPH8	MCG070 shCTRL	19672976	Alu	0.26087	+	3'UTR
MREG	MCG070 shCTRL	215943585	Alu	0.428571	-	3'UTR
MREG	MCG070 shCTRL	215943597	Alu	0.6	-	3'UTR
MRI1	MCG070 shCTRL	13772565	Alu	0.294118	+	3'UTR
MRI1	MCG070 shCTRL	13772707	Alu	0.571429	+	3'UTR
MRI1	MCG070 shCTRL	13773376	Alu	0.133333	+	3'UTR
MRI1	MCG070 shCTRL	13773605	Alu	0.777778	+	3'UTR
MRI1	MCG070 shCTRL	13773711	Alu	1	+	3'UTR
MRI1	MCG070 shCTRL	13773727	Alu	0.363636	+	3'UTR
MRI1	MCG070 shCTRL	13773758	Alu	0.7	+	3'UTR
MRPL30	MCG070 shCTRL	99195951	Alu	0.157895	+	3'UTR
MRPL30	MCG070 shCTRL	99196394	Alu	0.354839	+	3'UTR
MRPL30	MCG070 shCTRL	99196434	Alu	0.636364	+	3'UTR
MRPL30	MCG070 shCTRL	99196515	Alu	0.193548	+	3'UTR
MRPL30	MCG070 shCTRL	99196557	Alu	0.128205	+	3'UTR
MRPL42	MCG070 shCTRL	93504192	Alu	0.4	+	3'UTR
MRPS16	MCG070 shCTRL	73249827	Alu	0.145455	-	3'UTR
MTO1	MCG070 shCTRL	73502279	Alu	0.333333	+	3'UTR
MTO1	MCG070 shCTRL	73502282	Alu	0.333333	+	3'UTR
NDUFC2	MCG070 shCTRL	78068592	Alu	0.225806	-	3'UTR
NDUFC2	MCG070 shCTRL	78068663	Alu	0.275862	-	3'UTR
NDUFC2	MCG070 shCTRL	78069058	Alu	0.227273	-	3'UTR
NDUFC2	MCG070 shCTRL	78069071	Alu	0.16	-	3'UTR
NDUFV3	MCG070 shCTRL	42912503	Alu	0.333333	+	3'UTR
NDUFV3	MCG070 shCTRL	42912504	Alu	0.333333	+	3'UTR
NDUFV3	MCG070 shCTRL	42912735	Alu	0.25	+	3'UTR
NDUFV3	MCG070 shCTRL	42912742	Alu	0.25	+	3'UTR
NFATC2IP	MCG070 shCTRL	28965944	Alu	0.133333	+	3'UTR
NFATC2IP	MCG070 shCTRL	28965948	Alu	0.133333	+	3'UTR
NMNAT1	MCG070 shCTRL	9982930	Alu	0.75	+	3'UTR
NMT2	MCG070 shCTRL	15106274	Alu	0.214286	-	3'UTR
NOL9	MCG070 shCTRL	6522976	Alu	0.375	-	3'UTR
NOM1	MCG070 shCTRL	156970054	Alu	0.210526	+	3'UTR
NOM1	MCG070 shCTRL	156970055	Alu	0.210526	+	3'UTR
NOM1	MCG070 shCTRL	156970189	Alu	0.333333	+	3'UTR
NOM1	MCG070 shCTRL	156970212	Alu	0.416667	+	3'UTR
NOM1	MCG070 shCTRL	156970601	Alu	0.6	+	3'UTR
NOP14	MCG070 shCTRL	2938437	Alu	0.246753	-	3'UTR
NOP14	MCG070 shCTRL	2938538	Alu	0.161616	-	3'UTR
NOP14	MCG070 shCTRL	2938620	Alu	0.173333	-	3'UTR
NSL1	MCG070 shCTRL	212732531	Alu	0.666667	-	3'UTR
NSUN3	MCG070 shCTRL	94127966	Alu	0.4	+	3'UTR
NUP43	MCG070 shCTRL	149726282	Alu	0.25	-	3'UTR
ORC2	MCG070 shCTRL	200909670	Alu	0.333333	-	3'UTR
PAICS	MCG070 shCTRL	56460709	Alu	0.19469	+	3'UTR
PDF	MCG070 shCTRL	69328027	Alu	0.4	-	3'UTR
PEX2	MCG070 shCTRL	76982622	Alu	0.176471	-	3'UTR
PEX26	MCG070 shCTRL	18100258	Alu	0.6	+	3'UTR
PEX26	MCG070 shCTRL	18100327	Alu	0.4	+	3'UTR
PFAS	MCG070 shCTRL	8269931	Alu	0.214286	+	3'UTR
PGAM5	MCG070 shCTRL	132721370	Alu	0.166667	+	3'UTR
PGAM5	MCG070 shCTRL	132721753	Alu	0.25	+	3'UTR
PGPEP1	MCG070 shCTRL	18365366	Alu	0.307692	+	3'UTR
PGPEP1	MCG070 shCTRL	18365396	Alu	0.153846	+	3'UTR
PGPEP1	MCG070 shCTRL	18365410	Alu	0.181818	+	3'UTR
PGPEP1	MCG070 shCTRL	18366876	Alu	0.4375	+	3'UTR
PGPEP1	MCG070 shCTRL	18366951	Alu	0.208333	+	3'UTR
PGPEP1	MCG070 shCTRL	18367049	Alu	0.5	+	3'UTR
PGPEP1	MCG070 shCTRL	18368012	Alu	0.4	+	3'UTR
PGPEP1	MCG070 shCTRL	18368075	Alu	0.533333	+	3'UTR
PHACTR4	MCG070 shCTRL	28498825	Alu	0.153846	+	3'UTR
PHACTR4	MCG070 shCTRL	28498858	Alu	0.4	+	3'UTR
PHACTR4	MCG070 shCTRL	28499579	Alu	0.266667	+	3'UTR
PHACTR4	MCG070 shCTRL	28499606	Alu	0.238095	+	3'UTR
PHAX	MCG070 shCTRL	126625355	Alu	0.444444	+	3'UTR
PHAX	MCG070 shCTRL	126625476	Alu	0.606061	+	3'UTR
PHAX	MCG070 shCTRL	126625734	Alu	0.285714	+	3'UTR
PHAX	MCG070 shCTRL	126625755	Alu	0.181818	+	3'UTR
PHAX	MCG070 shCTRL	126625771	Alu	0.285714	+	3'UTR
PIAS2	MCG070 shCTRL	46807497	Alu	0.333333	-	3'UTR
PIAS2	MCG070 shCTRL	46807503	Alu	0.333333	-	3'UTR
PIAS2	MCG070 shCTRL	46809498	Alu	0.285714	-	3'UTR
PIAS2	MCG070 shCTRL	46809511	Alu	0.4	-	3'UTR
PIGBOS1	MCG070 shCTRL	55317452	Alu	0.263158	-	3'UTR
PLCXD1	MCG070 shCTRL	301888	Alu	0.375	+	3'UTR
POLA2	MCG070 shCTRL	65297701	Alu	0.428571	+	3'UTR
POLA2	MCG070 shCTRL	65297731	Alu	0.222222	+	3'UTR
POLA2	MCG070 shCTRL	65297780	Alu	0.5	+	3'UTR
POLA2	MCG070 shCTRL	65297790	Alu	0.8	+	3'UTR
POLA2	MCG070 shCTRL	65297849	Alu	0.583333	+	3'UTR
POLA2	MCG070 shCTRL	65297857	Alu	1	+	3'UTR
POLH	MCG070 shCTRL	43615435	Alu	0.5	+	3'UTR
POLH	MCG070 shCTRL	43615946	Alu	0.428571	+	3'UTR
POLH	MCG070 shCTRL	43616071	Alu	0.4	+	3'UTR
POLH	MCG070 shCTRL	43616133	Alu	0.444444	+	3'UTR
POLH	MCG070 shCTRL	43616159	Alu	0.3	+	3'UTR
POLR1B	MCG070 shCTRL	112576664	Nonalu	0.4	+	3'UTR
POLR2D	MCG070 shCTRL	127843890	Alu	0.648649	-	3'UTR
POLR2D	MCG070 shCTRL	127844060	Alu	0.25	-	3'UTR
POLR2D	MCG070 shCTRL	127844792	Alu	0.727273	-	3'UTR
POLR2D	MCG070 shCTRL	127845557	Alu	0.692308	-	3'UTR
POLR2D	MCG070 shCTRL	127845633	Alu	0.5	-	3'UTR
POLR2D	MCG070 shCTRL	127846037	Alu	0.6	-	3'UTR
POLR2D	MCG070 shCTRL	127846080	Alu	0.875	-	3'UTR
POLR2D	MCG070 shCTRL	127846086	Alu	0.25	-	3'UTR
POLR2J3	MCG070 shCTRL	102538125	Alu	0.625	-	3'UTR
PPARA	MCG070 shCTRL	46236167	Alu	0.153846	+	3'UTR
PPIA	MCG070 shCTRL	44802329	Alu	0.222222	+	3'UTR
PPP1R12B	MCG070 shCTRL	202582719	Alu	0.384615	+	3'UTR
PPP1R12B	MCG070 shCTRL	202582734	Alu	0.384615	+	3'UTR
PPP1R3E	MCG070 shCTRL	23296470	Alu	0.1875	-	3'UTR
PRKAR2A	MCG070 shCTRL	48750129	Alu	0.272727	-	3'UTR
PRKAR2A	MCG070 shCTRL	48750161	Alu	0.428571	-	3'UTR
PRKAR2A	MCG070 shCTRL	48750198	Alu	0.333333	-	3'UTR
PRKAR2A	MCG070 shCTRL	48750207	Alu	0.714286	-	3'UTR
PRKAR2A	MCG070 shCTRL	48750241	Alu	0.8	-	3'UTR
PRKAR2A	MCG070 shCTRL	48750251	Alu	0.8	-	3'UTR
PRKAR2A	MCG070 shCTRL	48750282	Alu	0.428571	-	3'UTR
PRKAR2A	MCG070 shCTRL	48750301	Alu	0.333333	-	3'UTR
PRKAR2A	MCG070 shCTRL	48750423	Alu	0.333333	-	3'UTR
PRR11	MCG070 shCTRL	59201707	Alu	0.25	+	3'UTR
PRR11	MCG070 shCTRL	59201709	Alu	0.75	+	3'UTR
PRR11	MCG070 shCTRL	59203603	Alu	0.153846	+	3'UTR
PRR11	MCG070 shCTRL	59203604	Alu	0.153846	+	3'UTR
PSMB2	MCG070 shCTRL	35602216	Alu	0.888889	-	3'UTR
PSMB2	MCG070 shCTRL	35602285	Alu	0.5	-	3'UTR
PSMB2	MCG070 shCTRL	35602583	Alu	0.307692	-	3'UTR
PSMB2	MCG070 shCTRL	35602630	Alu	0.538462	-	3'UTR
PSMB2	MCG070 shCTRL	35602674	Alu	0.25	-	3'UTR
PSMB2	MCG070 shCTRL	35602675	Alu	0.454545	-	3'UTR
PSMB2	MCG070 shCTRL	35602724	Alu	0.388889	-	3'UTR
PSMB2	MCG070 shCTRL	35602768	Alu	0.333333	-	3'UTR
PSMB2	MCG070 shCTRL	35602769	Alu	0.333333	-	3'UTR
PTRH1	MCG070 shCTRL	127713618	Alu	0.166667	-	3'UTR
PTRH1	MCG070 shCTRL	127713771	Alu	0.208333	-	3'UTR
PVR	MCG070 shCTRL	44662397	Alu	0.1875	+	3'UTR
PXMP4	MCG070 shCTRL	33706374	Alu	0.4	-	3'UTR
PXMP4	MCG070 shCTRL	33706375	Alu	0.4	-	3'UTR
RAB11FIP4	MCG070 shCTRL	31534285	Alu	0.444444	+	3'UTR
RAB11FIP4	MCG070 shCTRL	31534452	Alu	0.470588	+	3'UTR
RAB11FIP4	MCG070 shCTRL	31535165	Alu	0.15	+	3'UTR
RAD1	MCG070 shCTRL	34908270	Alu	0.2	-	3'UTR
RBBP4	MCG070 shCTRL	32683020	Alu	0.181818	+	3'UTR
RBBP4	MCG070 shCTRL	32683188	Alu	0.666667	+	3'UTR
RBM28	MCG070 shCTRL	128302936	Alu	0.4	-	3'UTR
RBM28	MCG070 shCTRL	128307926	Alu	0.529412	-	3'UTR
RBM8A	MCG070 shCTRL	145922075	Alu	0.333333	-	3'UTR
RBM8A	MCG070 shCTRL	145923018	Alu	0.355556	-	3'UTR
RBM8A	MCG070 shCTRL	145923163	Alu	0.333333	-	3'UTR
RFFL	MCG070 shCTRL	35008796	Alu	0.25	-	3'UTR
RFFL	MCG070 shCTRL	35008837	Alu	0.222222	-	3'UTR
RFFL	MCG070 shCTRL	35008904	Alu	0.181818	-	3'UTR
RILPL1	MCG070 shCTRL	123471353	Alu	0.2	-	3'UTR
RILPL1	MCG070 shCTRL	123471361	Alu	0.5	-	3'UTR
RNF125	MCG070 shCTRL	32068984	Alu	0.466667	+	3'UTR
RNF125	MCG070 shCTRL	32071923	Alu	0.25	+	3'UTR
RNF24	MCG070 shCTRL	3928568	Alu	0.361446	-	3'UTR
RNFT2	MCG070 shCTRL	116850766	Alu	0.428571	+	3'UTR
RNFT2	MCG070 shCTRL	116850767	Alu	0.428571	+	3'UTR
RNFT2	MCG070 shCTRL	116851483	Alu	0.777778	+	3'UTR
RNFT2	MCG070 shCTRL	116851530	Alu	0.333333	+	3'UTR
RNFT2	MCG070 shCTRL	116851584	Alu	0.25	+	3'UTR
RNFT2	MCG070 shCTRL	116851593	Alu	0.333333	+	3'UTR
RPL27A	MCG070 shCTRL	8687278	Alu	0.875	+	3'UTR
RPL27A	MCG070 shCTRL	8687344	Alu	0.3	+	3'UTR
RPL37	MCG070 shCTRL	40830767	Alu	0.3	-	3'UTR
RPL37	MCG070 shCTRL	40831076	Alu	0.4	-	3'UTR
RPL37	MCG070 shCTRL	40831202	Alu	0.285714	-	3'UTR
RPL37	MCG070 shCTRL	40831228	Alu	0.2	-	3'UTR
RPL37A	MCG070 shCTRL	216501867	Alu	0.25	+	3'UTR
RPL37A	MCG070 shCTRL	216501901	Alu	0.2	+	3'UTR
RPL37A	MCG070 shCTRL	216501921	Alu	0.2	+	3'UTR
RPL37A	MCG070 shCTRL	216501990	Alu	0.785714	+	3'UTR
RPL37A	MCG070 shCTRL	216502216	Alu	0.2	+	3'UTR
RPL37A	MCG070 shCTRL	216502247	Alu	0.142857	+	3'UTR
RPL7L1	MCG070 shCTRL	42888418	Alu	0.277778	+	3'UTR
RSL1D1	MCG070 shCTRL	11834989	Alu	0.5	-	3'UTR
RSL1D1	MCG070 shCTRL	11835320	Alu	0.181818	-	3'UTR
RSL1D1	MCG070 shCTRL	11835590	Alu	0.142857	-	3'UTR
SAMD8	MCG070 shCTRL	75180401	Alu	0.142857	+	3'UTR
SAMD8	MCG070 shCTRL	75180402	Alu	0.142857	+	3'UTR
SAMHD1	MCG070 shCTRL	36890593	Alu	0.153846	-	3'UTR
SAMHD1	MCG070 shCTRL	36890603	Alu	0.133333	-	3'UTR
SCO1	MCG070 shCTRL	10674425	Alu	0.375	-	3'UTR
SDHAF4	MCG070 shCTRL	70589350	Alu	0.4	+	3'UTR
SF3B3	MCG070 shCTRL	70575993	Alu	0.2	+	3'UTR
SF3B3	MCG070 shCTRL	70576875	Alu	0.32	+	3'UTR
SF3B3	MCG070 shCTRL	70576883	Alu	0.296296	+	3'UTR
SFT2D2	MCG070 shCTRL	168251094	Alu	0.166667	+	3'UTR
SFT2D2	MCG070 shCTRL	168251102	Alu	0.181818	+	3'UTR
SFT2D2	MCG070 shCTRL	168251169	Alu	0.538462	+	3'UTR
SLC25A45	MCG070 shCTRL	65376036	Alu	0.444444	-	3'UTR
SLC35E2B	MCG070 shCTRL	1663538	Alu	0.179487	-	3'UTR
SLC35E2B	MCG070 shCTRL	1663567	Alu	0.3125	-	3'UTR
SLC35E3	MCG070 shCTRL	68765061	Alu	0.222222	+	3'UTR
SMC5	MCG070 shCTRL	70354391	Alu	0.142857	+	3'UTR
SMC5	MCG070 shCTRL	70354429	Alu	0.1875	+	3'UTR
SMIM7	MCG070 shCTRL	16645760	Alu	0.571429	-	3'UTR
SMIM7	MCG070 shCTRL	16645835	Alu	0.125	-	3'UTR
SMIM7	MCG070 shCTRL	16645841	Alu	0.125	-	3'UTR
SMURF2	MCG070 shCTRL	64543506	Alu	0.285714	-	3'UTR
SMURF2	MCG070 shCTRL	64543511	Alu	0.25	-	3'UTR
SMYD4	MCG070 shCTRL	1780353	Alu	0.294118	-	3'UTR
SMYD4	MCG070 shCTRL	1780786	Alu	0.133333	-	3'UTR
SMYD4	MCG070 shCTRL	1780797	Alu	0.125	-	3'UTR
SMYD4	MCG070 shCTRL	1781012	Alu	0.25	-	3'UTR
SMYD4	MCG070 shCTRL	1781057	Alu	0.409091	-	3'UTR
SMYD4	MCG070 shCTRL	1781058	Alu	0.5	-	3'UTR
SMYD4	MCG070 shCTRL	1781202	Alu	0.206897	-	3'UTR
SNRPD3	MCG070 shCTRL	24573057	Alu	0.153846	+	3'UTR
SNRPD3	MCG070 shCTRL	24573058	Alu	0.307692	+	3'UTR
SNRPD3	MCG070 shCTRL	24573124	Alu	0.2	+	3'UTR
SNRPD3	MCG070 shCTRL	24573661	Alu	0.322581	+	3'UTR
SNRPD3	MCG070 shCTRL	24573787	Alu	0.25	+	3'UTR
SNRPD3	MCG070 shCTRL	24573814	Alu	0.322581	+	3'UTR
SNRPD3	MCG070 shCTRL	24574671	Alu	0.615385	+	3'UTR
SNRPD3	MCG070 shCTRL	24574707	Alu	0.26087	+	3'UTR
SNRPD3	MCG070 shCTRL	24574708	Alu	0.217391	+	3'UTR
SNX1	MCG070 shCTRL	64142243	Alu	0.6	+	3'UTR
SOAT1	MCG070 shCTRL	179357342	Alu	0.4	+	3'UTR
SOAT1	MCG070 shCTRL	179357712	Alu	0.25	+	3'UTR
SOAT1	MCG070 shCTRL	179357715	Alu	0.222222	+	3'UTR
SOAT1	MCG070 shCTRL	179357773	Alu	0.571429	+	3'UTR
SOD2	MCG070 shCTRL	159680928	Alu	0.4	-	3'UTR
SOD2	MCG070 shCTRL	159680930	Alu	0.4	-	3'UTR
SP110	MCG070 shCTRL	230168047	Alu	0.25	-	3'UTR
SP110	MCG070 shCTRL	230168068	Alu	0.8	-	3'UTR
SPC24	MCG070 shCTRL	11146013	Alu	0.261062	-	3'UTR
SPC24	MCG070 shCTRL	11146049	Alu	0.266393	-	3'UTR
SPC24	MCG070 shCTRL	11146832	Alu	0.172414	-	3'UTR
SPCS3	MCG070 shCTRL	176331176	Nonalu	0.833333	+	3'UTR
SPECC1	MCG070 shCTRL	20314560	Alu	0.15493	+	3'UTR
SPN	MCG070 shCTRL	29668565	Alu	0.5	+	3'UTR
SPN	MCG070 shCTRL	29669755	Alu	0.5	+	3'UTR
SPN	MCG070 shCTRL	29669756	Alu	0.5	+	3'UTR
SPN	MCG070 shCTRL	29670139	Alu	0.181818	+	3'UTR
SPN	MCG070 shCTRL	29670239	Alu	0.24	+	3'UTR
SPN	MCG070 shCTRL	29670430	Alu	0.1875	+	3'UTR
SRD5A3	MCG070 shCTRL	55370670	Alu	0.666667	+	3'UTR
SRFBP1	MCG070 shCTRL	122027180	Alu	0.181818	+	3'UTR
SSTR2	MCG070 shCTRL	73171774	Alu	0.285714	+	3'UTR
ST3GAL2	MCG070 shCTRL	70377013	Alu	0.2	-	3'UTR
ST3GAL2	MCG070 shCTRL	70377014	Alu	0.2	-	3'UTR
ST3GAL2	MCG070 shCTRL	70379689	Alu	0.210526	-	3'UTR
STK4	MCG070 shCTRL	45078306	Alu	0.6	+	3'UTR
SYAP1	MCG070 shCTRL	16764527	Alu	0.25	+	3'UTR
SYAP1	MCG070 shCTRL	16764545	Alu	0.333333	+	3'UTR
SYAP1	MCG070 shCTRL	16764764	Alu	0.166667	+	3'UTR
SYNJ2BP	MCG070 shCTRL	70371557	Alu	0.142857	-	3'UTR
SYNJ2BP	MCG070 shCTRL	70371607	Alu	0.176471	-	3'UTR
SYNRG	MCG070 shCTRL	37516985	Alu	0.444444	-	3'UTR
SYNRG	MCG070 shCTRL	37517052	Alu	0.555556	-	3'UTR
SYT11	MCG070 shCTRL	155881854	Alu	0.285714	+	3'UTR
SYT11	MCG070 shCTRL	155881855	Alu	0.285714	+	3'UTR
TAF8	MCG070 shCTRL	42078893	Alu	0.6	+	3'UTR
TAF8	MCG070 shCTRL	42081276	Alu	0.181818	+	3'UTR
TCTA	MCG070 shCTRL	49415409	Alu	0.15873	+	3'UTR
TFDP2	MCG070 shCTRL	141945222	Alu	0.347826	-	3'UTR
TFDP2	MCG070 shCTRL	141945294	Alu	0.214286	-	3'UTR
TFDP2	MCG070 shCTRL	141945332	Alu	0.166667	-	3'UTR
TFDP2	MCG070 shCTRL	141946904	Alu	0.5	-	3'UTR
TFDP2	MCG070 shCTRL	141946906	Alu	0.5	-	3'UTR
TFDP2	MCG070 shCTRL	141946945	Alu	0.666667	-	3'UTR
TFDP2	MCG070 shCTRL	141946946	Alu	1	-	3'UTR
TFDP2	MCG070 shCTRL	141947517	Alu	0.470588	-	3'UTR
TFDP2	MCG070 shCTRL	141947553	Alu	0.130435	-	3'UTR
TFDP2	MCG070 shCTRL	141948307	Alu	0.45	-	3'UTR
TFDP2	MCG070 shCTRL	141948325	Alu	0.210526	-	3'UTR
TFDP2	MCG070 shCTRL	141948461	Alu	0.2	-	3'UTR
TFDP2	MCG070 shCTRL	141948915	Alu	0.294118	-	3'UTR
TFDP2	MCG070 shCTRL	141949989	Alu	0.448276	-	3'UTR
TFDP2	MCG070 shCTRL	141950080	Alu	0.172414	-	3'UTR
TFDP2	MCG070 shCTRL	141950096	Alu	0.352941	-	3'UTR
TIMM50	MCG070 shCTRL	39491952	Alu	0.4	+	3'UTR
TIMM50	MCG070 shCTRL	39492751	Alu	0.222222	+	3'UTR
TIMM50	MCG070 shCTRL	39492790	Alu	0.4	+	3'UTR
TIMM50	MCG070 shCTRL	39492826	Alu	0.6	+	3'UTR
TINCR	MCG070 shCTRL	5559513	Alu	0.25	-	3'UTR
TLCD2	MCG070 shCTRL	1703513	Alu	0.333333	-	3'UTR
TLCD2	MCG070 shCTRL	1703652	Alu	0.666667	-	3'UTR
TLCD2	MCG070 shCTRL	1704983	Alu	0.26087	-	3'UTR
TMEM106A	MCG070 shCTRL	43219625	Alu	0.428571	+	3'UTR
TMEM106A	MCG070 shCTRL	43219652	Alu	1	+	3'UTR
TMEM170A	MCG070 shCTRL	75445496	Alu	0.875	-	3'UTR
TMEM170A	MCG070 shCTRL	75445572	Alu	0.555556	-	3'UTR
TMEM170A	MCG070 shCTRL	75446009	Alu	0.195652	-	3'UTR
TMEM19	MCG070 shCTRL	71703070	Alu	0.384615	+	3'UTR
TMEM192	MCG070 shCTRL	165078928	Alu	0.208333	-	3'UTR
TMEM220	MCG070 shCTRL	10714796	Alu	0.285714	-	3'UTR
TMEM220	MCG070 shCTRL	10714799	Alu	0.333333	-	3'UTR
TNFAIP8L1	MCG070 shCTRL	4653226	Alu	0.133333	+	3'UTR
TNFAIP8L1	MCG070 shCTRL	4653661	Alu	0.461538	+	3'UTR
TNFAIP8L1	MCG070 shCTRL	4654525	Alu	0.222222	+	3'UTR
TOP3A	MCG070 shCTRL	18272753	Alu	0.375	-	3'UTR
TOP3A	MCG070 shCTRL	18274061	Alu	0.428571	-	3'UTR
TOP3A	MCG070 shCTRL	18274116	Alu	0.375	-	3'UTR
TOP3A	MCG070 shCTRL	18274140	Alu	0.25	-	3'UTR
TPST2	MCG070 shCTRL	26524431	Alu	0.25	-	3'UTR
TPST2	MCG070 shCTRL	26524455	Alu	0.266667	-	3'UTR
TPT1	MCG070 shCTRL	45334031	Alu	0.357143	-	3'UTR
TPT1	MCG070 shCTRL	45334037	Alu	0.266667	-	3'UTR
TPT1	MCG070 shCTRL	45334144	Alu	0.631579	-	3'UTR
TRIM8	MCG070 shCTRL	102659812	Alu	0.333333	+	3'UTR
TRIOBP	MCG070 shCTRL	37775531	Alu	0.181818	+	3'UTR
TRMT2B	MCG070 shCTRL	101009593	Alu	0.2	-	3'UTR
TSPAN14	MCG070 shCTRL	80522325	Alu	0.15	+	3'UTR
TSPAN14	MCG070 shCTRL	80522372	Alu	0.266667	+	3'UTR
TTC39B	MCG070 shCTRL	15167624	Alu	0.333333	-	3'UTR
TTC39B	MCG070 shCTRL	15167640	Alu	0.333333	-	3'UTR
UBOX5	MCG070 shCTRL	3108290	Alu	0.3	-	3'UTR
UBOX5	MCG070 shCTRL	3108302	Alu	0.272727	-	3'UTR
UBXN2A	MCG070 shCTRL	24004445	Alu	0.142857	+	3'UTR
UBXN2A	MCG070 shCTRL	24004447	Alu	0.142857	+	3'UTR
UBXN7	MCG070 shCTRL	196353729	Alu	0.538462	-	3'UTR
UBXN7	MCG070 shCTRL	196353753	Alu	0.362745	-	3'UTR
UGGT1	MCG070 shCTRL	128192968	Alu	0.714286	+	3'UTR
UGGT1	MCG070 shCTRL	128192974	Alu	0.714286	+	3'UTR
UGGT1	MCG070 shCTRL	128193021	Alu	0.666667	+	3'UTR
UGGT1	MCG070 shCTRL	128193030	Alu	0.571429	+	3'UTR
UGGT1	MCG070 shCTRL	128193056	Alu	1	+	3'UTR
UQCC3	MCG070 shCTRL	62672643	Alu	0.181818	+	3'UTR
VHL	MCG070 shCTRL	10151069	Alu	0.272727	+	3'UTR
VMAC	MCG070 shCTRL	5909498	Alu	0.4	+	3'UTR
VMAC	MCG070 shCTRL	5909710	Alu	0.5	+	3'UTR
VMAC	MCG070 shCTRL	5909711	Alu	0.3	+	3'UTR
VPS41	MCG070 shCTRL	38723551	Alu	0.764706	-	3'UTR
VPS41	MCG070 shCTRL	38723558	Alu	0.333333	-	3'UTR
VPS41	MCG070 shCTRL	38723641	Alu	0.285714	-	3'UTR
VPS53	MCG070 shCTRL	516452	Alu	0.145833	-	3'UTR
VPS53	MCG070 shCTRL	517657	Alu	0.222222	-	3'UTR
VPS53	MCG070 shCTRL	517794	Alu	0.181818	-	3'UTR
WDR73	MCG070 shCTRL	84642257	Alu	0.8	-	3'UTR
XPNPEP3	MCG070 shCTRL	40930904	Alu	0.285714	+	3'UTR
XPNPEP3	MCG070 shCTRL	40931523	Alu	0.625	+	3'UTR
XPNPEP3	MCG070 shCTRL	40931532	Alu	0.625	+	3'UTR
XPOT	MCG070 shCTRL	64448989	Alu	0.162791	+	3'UTR
XPOT	MCG070 shCTRL	64450281	Alu	0.452381	+	3'UTR
XPOT	MCG070 shCTRL	64450291	Alu	0.880952	+	3'UTR
XPOT	MCG070 shCTRL	64450354	Alu	0.4	+	3'UTR
XPOT	MCG070 shCTRL	64450369	Alu	0.288889	+	3'UTR
XRCC2	MCG070 shCTRL	152645818	Alu	0.428571	-	3'UTR
XRCC2	MCG070 shCTRL	152645907	Alu	0.5	-	3'UTR
YIPF4	MCG070 shCTRL	32307809	Alu	0.307692	+	3'UTR
YIPF4	MCG070 shCTRL	32309828	Alu	0.4	+	3'UTR
YIPF4	MCG070 shCTRL	32310767	Alu	0.176471	+	3'UTR
ZBTB24	MCG070 shCTRL	109463083	Alu	0.5	-	3'UTR
ZNF101	MCG070 shCTRL	19680540	Alu	0.285714	+	3'UTR
ZNF101	MCG070 shCTRL	19680547	Alu	0.285714	+	3'UTR
ZNF101	MCG070 shCTRL	19683015	Alu	0.230769	+	3'UTR
ZNF101	MCG070 shCTRL	19683067	Alu	0.266667	+	3'UTR
ZNF121	MCG070 shCTRL	9562795	Alu	0.25	-	3'UTR
ZNF141	MCG070 shCTRL	382075	Alu	0.4	+	3'UTR
ZNF141	MCG070 shCTRL	382085	Alu	0.333333	+	3'UTR
ZNF141	MCG070 shCTRL	382131	Alu	0.214286	+	3'UTR
ZNF141	MCG070 shCTRL	382153	Alu	0.15	+	3'UTR
ZNF264	MCG070 shCTRL	57220747	Alu	0.363636	+	3'UTR
ZNF346	MCG070 shCTRL	177080661	Alu	0.333333	+	3'UTR
ZNF346	MCG070 shCTRL	177080681	Alu	0.333333	+	3'UTR
ZNF346	MCG070 shCTRL	177080728	Alu	0.4	+	3'UTR
ZNF346	MCG070 shCTRL	177080729	Alu	0.4	+	3'UTR
ZNF347	MCG070 shCTRL	53135462	Alu	0.307692	-	3'UTR
ZNF397	MCG070 shCTRL	35247800	Alu	0.25	+	3'UTR
ZNF397	MCG070 shCTRL	35247859	Alu	0.272727	+	3'UTR
ZNF397	MCG070 shCTRL	35248579	Alu	0.4375	+	3'UTR
ZNF397	MCG070 shCTRL	35248721	Alu	0.133333	+	3'UTR
ZNF397	MCG070 shCTRL	35249532	Alu	0.222222	+	3'UTR
ZNF431	MCG070 shCTRL	21184141	Alu	0.333333	+	3'UTR
ZNF431	MCG070 shCTRL	21184265	Alu	0.272727	+	3'UTR
ZNF445	MCG070 shCTRL	44433279	Alu	0.3125	-	3'UTR
ZNF445	MCG070 shCTRL	44438242	Alu	0.181818	-	3'UTR
ZNF445	MCG070 shCTRL	44438256	Alu	0.5	-	3'UTR
ZNF445	MCG070 shCTRL	44438297	Alu	0.25	-	3'UTR
ZNF445	MCG070 shCTRL	44439227	Alu	0.6	-	3'UTR
ZNF445	MCG070 shCTRL	44439228	Alu	0.6	-	3'UTR
ZNF506	MCG070 shCTRL	19786351	Alu	0.173913	-	3'UTR
ZNF506	MCG070 shCTRL	19786802	Alu	0.173913	-	3'UTR
ZNF506	MCG070 shCTRL	19792298	Alu	0.666667	-	3'UTR
ZNF506	MCG070 shCTRL	19792366	Alu	0.25	-	3'UTR
ZNF526	MCG070 shCTRL	42227611	Alu	0.7	+	3'UTR
ZNF526	MCG070 shCTRL	42227615	Alu	0.3	+	3'UTR
ZNF554	MCG070 shCTRL	2835132	Alu	0.4	+	3'UTR
ZNF557	MCG070 shCTRL	7084420	Alu	0.4	+	3'UTR
ZNF557	MCG070 shCTRL	7085407	Alu	0.25	+	3'UTR
ZNF557	MCG070 shCTRL	7086029	Alu	0.375	+	3'UTR
ZNF557	MCG070 shCTRL	7086108	Alu	0.285714	+	3'UTR
ZNF557	MCG070 shCTRL	7086111	Alu	0.285714	+	3'UTR
ZNF557	MCG070 shCTRL	7087420	Alu	0.3125	+	3'UTR
ZNF587	MCG070 shCTRL	57860680	Alu	0.8	+	3'UTR
ZNF587	MCG070 shCTRL	57863828	Alu	0.4	+	3'UTR
ZNF587	MCG070 shCTRL	57864375	Alu	0.357143	+	3'UTR
ZNF587	MCG070 shCTRL	57864406	Alu	0.266667	+	3'UTR
ZNF587B	MCG070 shCTRL	57844472	Alu	0.285714	+	3'UTR
ZNF587B	MCG070 shCTRL	57845790	Alu	0.181818	+	3'UTR
ZNF611	MCG070 shCTRL	52704129	Alu	0.285714	-	3'UTR
ZNF69	MCG070 shCTRL	11913663	Alu	0.444444	+	3'UTR
ZNF69	MCG070 shCTRL	11914132	Alu	0.4	+	3'UTR
ZNF69	MCG070 shCTRL	11914196	Alu	0.5	+	3'UTR
ZNF696	MCG070 shCTRL	143297403	Alu	0.142857	+	3'UTR
ZNF696	MCG070 shCTRL	143297439	Alu	0.153846	+	3'UTR
ZNF708	MCG070 shCTRL	21291680	Alu	0.6	-	3'UTR
ZNF708	MCG070 shCTRL	21291699	Alu	0.6	-	3'UTR
ZNF714	MCG070 shCTRL	21122498	Alu	0.428571	+	3'UTR
ZNF765	MCG070 shCTRL	53411426	Alu	0.266667	+	3'UTR
ZNF816-ZNF321P	MCG070 shCTRL	52927199	Alu	0.3	-	3'UTR
ZNF816-ZNF321P	MCG070 shCTRL	52927537	Alu	0.428571	-	3'UTR
ZNF816-ZNF321P	MCG070 shCTRL	52927553	Alu	0.428571	-	3'UTR
ZSCAN2	MCG070 shCTRL	84623157	Alu	0.15	+	3'UTR
ANAPC16	MCG070 shCTRL	72220101	Alu	0.125	+	5'UTR
PTER	MCG070 shCTRL	16437386	Alu	0.5	+	5'UTR
ZNF639	MCG070 shCTRL	179325235	Alu	0.214286	+	5'UTR
ABHD14B	MCG070 shCTRL	51973570	Alu	0.222222	-	Intron
ABHD14B	MCG070 shCTRL	51973621	Alu	0.266667	-	Intron
AC098614.2	MCG070 shCTRL	27634724	Alu	0.666667	+	Intron
AC105052.1	MCG070 shCTRL	102626832	Alu	0.4	-	Intron
AC105052.1	MCG070 shCTRL	102628949	Alu	0.8	-	Intron
AC105052.1	MCG070 shCTRL	102629098	Alu	0.333333	-	Intron
ACSF3	MCG070 shCTRL	89152432	Alu	0.375	+	Intron
ACSF3	MCG070 shCTRL	89152461	Alu	0.428571	+	Intron
ACVR2B	MCG070 shCTRL	38467193	Alu	1	+	Intron
ACVR2B	MCG070 shCTRL	38467198	Alu	1	+	Intron
ADPGK	MCG070 shCTRL	72779446	Alu	0.444444	-	Intron
AGFG1	MCG070 shCTRL	227539612	Alu	0.6	+	Intron
AGO4	MCG070 shCTRL	35831259	Alu	0.333333	+	Intron
AK3	MCG070 shCTRL	4733048	Alu	0.4	-	Intron
AK3	MCG070 shCTRL	4739335	Alu	0.388889	-	Intron
AKAP8L	MCG070 shCTRL	15386841	Alu	0.4	-	Intron
AKAP8L	MCG070 shCTRL	15386932	Alu	0.333333	-	Intron
AKR7A2	MCG070 shCTRL	19305522	Alu	0.4	-	Intron
AKT2	MCG070 shCTRL	40276854	Alu	0.555556	-	Intron
ALOX12P2	MCG070 shCTRL	6910345	Alu	0.428571	+	Intron
ALOX12P2	MCG070 shCTRL	6910896	Alu	0.875	+	Intron
ALOX12P2	MCG070 shCTRL	6910954	Alu	0.272727	+	Intron
ALOX12P2	MCG070 shCTRL	6911029	Alu	0.545455	+	Intron
AMPD3	MCG070 shCTRL	10457031	Alu	0.5	+	Intron
AMPD3	MCG070 shCTRL	10457164	Alu	0.166667	+	Intron
AMPD3	MCG070 shCTRL	10457183	Alu	0.416667	+	Intron
AMPD3	MCG070 shCTRL	10457758	Alu	0.380952	+	Intron
AMPD3	MCG070 shCTRL	10457839	Alu	0.5	+	Intron
ANKDD1A	MCG070 shCTRL	64931974	Alu	0.5	+	Intron
ANKRD10	MCG070 shCTRL	110897383	Alu	0.461538	-	Intron
ANKRD10	MCG070 shCTRL	110898670	Alu	0.166667	-	Intron
ANKRD10	MCG070 shCTRL	110898861	Alu	0.125	-	Intron
ANKRD11	MCG070 shCTRL	89385112	Alu	0.6	-	Intron
ANO9	MCG070 shCTRL	423969	Alu	0.333333	-	Intron
ANO9	MCG070 shCTRL	424047	Alu	0.333333	-	Intron
AP2A1	MCG070 shCTRL	49804115	Alu	0.166667	+	Intron
AP2A1	MCG070 shCTRL	49804116	Alu	0.666667	+	Intron
APOLD1	MCG070 shCTRL	12728067	Alu	0.4	+	Intron
APOLD1	MCG070 shCTRL	12728150	Alu	0.428571	+	Intron
APOLD1	MCG070 shCTRL	12728152	Alu	0.833333	+	Intron
APOLD1	MCG070 shCTRL	12728263	Alu	0.4	+	Intron
APOLD1	MCG070 shCTRL	12728404	Alu	0.5	+	Intron
APOLD1	MCG070 shCTRL	12728547	Alu	0.230769	+	Intron
APOLD1	MCG070 shCTRL	12728565	Alu	0.545455	+	Intron
APOLD1	MCG070 shCTRL	12728596	Alu	0.444444	+	Intron
APOLD1	MCG070 shCTRL	12730587	Alu	0.166667	+	Intron
ARHGEF18	MCG070 shCTRL	7432529	Alu	0.285714	+	Intron
ARHGEF7	MCG070 shCTRL	111207238	Alu	0.4	+	Intron
ARHGEF9	MCG070 shCTRL	63749410	Alu	0.333333	-	Intron
ARHGEF9	MCG070 shCTRL	63749413	Alu	0.333333	-	Intron
ARID2	MCG070 shCTRL	45842075	Alu	0.25	+	Intron
ARID2	MCG070 shCTRL	45842120	Alu	0.285714	+	Intron
ARPC2	MCG070 shCTRL	218235855	Alu	0.285714	+	Intron
ARRDC5	MCG070 shCTRL	4891698	Alu	0.25	-	Intron
ARRDC5	MCG070 shCTRL	4895177	Alu	0.333333	-	Intron
ARRDC5	MCG070 shCTRL	4897655	Alu	0.285714	-	Intron
ASCC2	MCG070 shCTRL	29832958	Alu	0.2	-	Intron
ASCC2	MCG070 shCTRL	29832961	Alu	0.222222	-	Intron
ASLP1	MCG070 shCTRL	23650267	Alu	0.2	-	Intron
ASPSCR1	MCG070 shCTRL	82002992	Alu	0.4	+	Intron
ASPSCR1	MCG070 shCTRL	82003264	Alu	0.333333	+	Intron
ASPSCR1	MCG070 shCTRL	82003327	Alu	0.181818	+	Intron
ATL2	MCG070 shCTRL	38339013	Alu	0.333333	-	Intron
ATP2A3	MCG070 shCTRL	3932337	Alu	0.5	-	Intron
ATP2A3	MCG070 shCTRL	3932342	Alu	0.428571	-	Intron
ATP2B4	MCG070 shCTRL	203679616	Alu	0.333333	+	Intron
ATP2C1	MCG070 shCTRL	131008306	Alu	0.166667	+	Intron
ATP2C1	MCG070 shCTRL	131008307	Alu	0.166667	+	Intron
ATP8B4	MCG070 shCTRL	50099418	Alu	0.714286	-	Intron
ATXN2	MCG070 shCTRL	111585268	Alu	0.235294	-	Intron
AURKA	MCG070 shCTRL	56388760	Alu	0.222222	-	Intron
BABAM1	MCG070 shCTRL	17276122	Alu	0.8	+	Intron
BAD	MCG070 shCTRL	64272153	Alu	0.5	-	Intron
BANP	MCG070 shCTRL	87987460	Alu	0.4	+	Intron
BAZ2B	MCG070 shCTRL	159584260	Alu	0.4	-	Intron
BAZ2B	MCG070 shCTRL	159584286	Alu	0.4	-	Intron
BCL11B	MCG070 shCTRL	99250230	Alu	0.6	-	Intron
BCL2L1	MCG070 shCTRL	31667216	Alu	0.6	-	Intron
BECN1	MCG070 shCTRL	42823315	Alu	0.6	-	Intron
BPTF	MCG070 shCTRL	67882805	Alu	0.6	+	Intron
BRD4	MCG070 shCTRL	15258702	Alu	0.571429	-	Intron
BTBD2	MCG070 shCTRL	2008843	Alu	0.5	-	Intron
BTBD2	MCG070 shCTRL	2009166	Alu	0.4	-	Intron
BTBD2	MCG070 shCTRL	2009245	Alu	0.4	-	Intron
BUB1B	MCG070 shCTRL	40180855	Alu	0.333333	+	Intron
BUB1B	MCG070 shCTRL	40181221	Alu	0.2	+	Intron
BUB1B	MCG070 shCTRL	40181231	Alu	0.2	+	Intron
C11orf49	MCG070 shCTRL	47053419	Alu	0.285714	+	Intron
C11orf49	MCG070 shCTRL	47053472	Alu	0.333333	+	Intron
C11orf54	MCG070 shCTRL	93743210	Alu	0.444444	+	Intron
C11orf80	MCG070 shCTRL	66793880	Alu	0.333333	+	Intron
C11orf80	MCG070 shCTRL	66793897	Alu	0.333333	+	Intron
C12orf65	MCG070 shCTRL	123235877	Alu	0.6	+	Intron
C12orf65	MCG070 shCTRL	123235941	Alu	0.428571	+	Intron
C12orf65	MCG070 shCTRL	123235944	Alu	0.714286	+	Intron
C12orf65	MCG070 shCTRL	123235997	Alu	0.4	+	Intron
C12orf65	MCG070 shCTRL	123236013	Alu	0.4	+	Intron
C12orf65	MCG070 shCTRL	123254658	Alu	0.166667	+	Intron
C12orf65	MCG070 shCTRL	123256573	Alu	0.4	+	Intron
C12orf65	MCG070 shCTRL	123256575	Alu	0.4	+	Intron
C14orf119	MCG070 shCTRL	23096297	Alu	0.25641	+	Intron
C16orf72	MCG070 shCTRL	9110891	Alu	0.215686	+	Intron
C16orf74	MCG070 shCTRL	85725742	Alu	0.375	-	Intron
C1QTNF3	MCG070 shCTRL	34196311	Alu	0.142857	-	Intron
C1QTNF3	MCG070 shCTRL	34196411	Alu	0.307692	-	Intron
C1QTNF3	MCG070 shCTRL	34196894	Alu	0.4	-	Intron
C1QTNF3	MCG070 shCTRL	34196902	Alu	0.4	-	Intron
C1orf159	MCG070 shCTRL	1098749	Alu	1	-	Intron
C20orf194	MCG070 shCTRL	3262415	Alu	0.285714	-	Intron
C20orf194	MCG070 shCTRL	3262424	Alu	0.25	-	Intron
C6orf62	MCG070 shCTRL	24710363	Alu	0.263158	-	Intron
C6orf89	MCG070 shCTRL	36888376	Alu	0.285714	+	Intron
CAB39L	MCG070 shCTRL	49441523	Alu	0.666667	-	Intron
CAB39L	MCG070 shCTRL	49441531	Alu	0.6	-	Intron
CAB39L	MCG070 shCTRL	49441567	Alu	0.6	-	Intron
CACNB1	MCG070 shCTRL	39178610	Alu	0.142857	-	Intron
CACNB1	MCG070 shCTRL	39178628	Alu	0.166667	-	Intron
CAMK1D	MCG070 shCTRL	12743200	Alu	0.285714	+	Intron
CAMKMT	MCG070 shCTRL	44539122	Alu	0.285714	+	Intron
CAPN15	MCG070 shCTRL	532161	Alu	0.6	+	Intron
CARHSP1	MCG070 shCTRL	8862095	Alu	0.3	-	Intron
CASP10	MCG070 shCTRL	201199826	Alu	0.833333	+	Intron
CCAR1	MCG070 shCTRL	68777966	Alu	0.375	+	Intron
CCDC130	MCG070 shCTRL	13760733	Alu	0.375	+	Intron
CCDC57	MCG070 shCTRL	82123380	Alu	0.333333	-	Intron
CCM2	MCG070 shCTRL	45042122	Alu	0.4	+	Intron
CCND3	MCG070 shCTRL	41965223	Alu	0.5	-	Intron
CCND3	MCG070 shCTRL	41979006	Alu	0.4	-	Intron
CCND3	MCG070 shCTRL	42034683	Alu	0.333333	-	Intron
CCT8	MCG070 shCTRL	29063852	Alu	0.571429	-	Intron
CCT8	MCG070 shCTRL	29064274	Alu	0.285714	-	Intron
CD247	MCG070 shCTRL	167476589	Alu	0.4	-	Intron
CD247	MCG070 shCTRL	167507830	Alu	0.625	-	Intron
CDC25C	MCG070 shCTRL	138317061	Alu	0.4	-	Intron
CDIP1	MCG070 shCTRL	4534883	Alu	0.25	-	Intron
CDK10	MCG070 shCTRL	89687638	Alu	0.875	+	Intron
CDK10	MCG070 shCTRL	89687649	Alu	0.375	+	Intron
CDK10	MCG070 shCTRL	89687702	Alu	0.222222	+	Intron
CDK10	MCG070 shCTRL	89688845	Alu	0.4	+	Intron
CDK10	MCG070 shCTRL	89688846	Alu	0.4	+	Intron
CDK6	MCG070 shCTRL	92711994	Alu	0.4	-	Intron
CDK6	MCG070 shCTRL	92711999	Alu	0.6	-	Intron
CENPN	MCG070 shCTRL	81029749	Alu	0.333333	+	Intron
CENPN	MCG070 shCTRL	81029758	Alu	0.5	+	Intron
CENPN	MCG070 shCTRL	81030629	Alu	0.428571	+	Intron
CENPN	MCG070 shCTRL	81030969	Alu	0.833333	+	Intron
CENPN	MCG070 shCTRL	81030970	Alu	0.5	+	Intron
CERCAM	MCG070 shCTRL	128423431	Alu	0.222222	+	Intron
CERS5	MCG070 shCTRL	50145016	Alu	0.222222	-	Intron
CERS5	MCG070 shCTRL	50145052	Alu	0.25	-	Intron
CERS5	MCG070 shCTRL	50162768	Alu	0.4	-	Intron
CHD2	MCG070 shCTRL	92908850	Alu	0.2	+	Intron
CHD2	MCG070 shCTRL	92908863	Alu	0.26087	+	Intron
CHD2	MCG070 shCTRL	92908998	Alu	0.266667	+	Intron
CHD2	MCG070 shCTRL	92909040	Alu	0.25	+	Intron
CKLF	MCG070 shCTRL	66564600	Alu	0.5	+	Intron
CLCN6	MCG070 shCTRL	11820646	Alu	0.5	+	Intron
CLNS1A	MCG070 shCTRL	77617176	Alu	0.4	-	Intron
CNNM2	MCG070 shCTRL	102927505	Alu	0.571429	+	Intron
CNPY2	MCG070 shCTRL	56312844	Alu	0.206349	-	Intron
CNPY2	MCG070 shCTRL	56314030	Alu	0.333333	-	Intron
COMT	MCG070 shCTRL	19948425	Alu	0.375	+	Intron
COMT	MCG070 shCTRL	19952384	Alu	0.25	+	Intron
COPE	MCG070 shCTRL	18908187	Alu	0.181818	-	Intron
COPE	MCG070 shCTRL	18908188	Alu	0.181818	-	Intron
CRLF3	MCG070 shCTRL	30808448	Alu	0.285714	-	Intron
CSNK1A1	MCG070 shCTRL	149548727	Alu	0.181818	-	Intron
CSNK1A1	MCG070 shCTRL	149548737	Alu	0.181818	-	Intron
CSNK1A1	MCG070 shCTRL	149548792	Alu	0.222222	-	Intron
CSNK1E	MCG070 shCTRL	38312294	Alu	0.666667	-	Intron
CSNK1E	MCG070 shCTRL	38312308	Alu	0.625	-	Intron
CSNK2A1	MCG070 shCTRL	530651	Alu	0.4	-	Intron
CSNK2A1	MCG070 shCTRL	530653	Alu	0.4	-	Intron
CTSA	MCG070 shCTRL	45895820	Alu	0.4	+	Intron
CUX1	MCG070 shCTRL	101837579	Alu	0.3	+	Intron
CUX1	MCG070 shCTRL	101837619	Alu	0.555556	+	Intron
CUX1	MCG070 shCTRL	101837766	Alu	0.285714	+	Intron
CUX1	MCG070 shCTRL	101841740	Alu	0.222222	+	Intron
CUX1	MCG070 shCTRL	101870436	Alu	0.285714	+	Intron
CUX1	MCG070 shCTRL	101873736	Alu	0.4	+	Intron
CUX1	MCG070 shCTRL	101873750	Alu	0.4	+	Intron
CUX1	MCG070 shCTRL	101951647	Alu	0.5	+	Intron
CUX1	MCG070 shCTRL	101951714	Alu	0.6	+	Intron
CUX1	MCG070 shCTRL	101959080	Alu	0.333333	+	Intron
CWF19L1	MCG070 shCTRL	100253176	Alu	1	-	Intron
CYFIP2	MCG070 shCTRL	157386864	Alu	0.5	+	Intron
CYGB	MCG070 shCTRL	76534346	Alu	0.4	-	Intron
CYGB	MCG070 shCTRL	76534349	Alu	0.4	-	Intron
CYP2R1	MCG070 shCTRL	14890685	Alu	0.655172	-	Intron
DCAF16	MCG070 shCTRL	17805777	Alu	0.3	-	Intron
DCAF16	MCG070 shCTRL	17805779	Alu	0.3	-	Intron
DDB2	MCG070 shCTRL	47230999	Alu	0.4	+	Intron
DDX55	MCG070 shCTRL	123604151	Alu	0.8	+	Intron
DENND6A	MCG070 shCTRL	57677552	Alu	0.375	-	Intron
DFFA	MCG070 shCTRL	10461993	Alu	0.125	-	Intron
DGKA	MCG070 shCTRL	55943405	Alu	0.222222	+	Intron
DHDDS	MCG070 shCTRL	26447791	Alu	0.285714	+	Intron
DHRS7B	MCG070 shCTRL	21140163	Alu	0.5	+	Intron
DHX30	MCG070 shCTRL	47809451	Alu	0.4	+	Intron
DHX33	MCG070 shCTRL	5462221	Alu	0.1875	-	Intron
DHX34	MCG070 shCTRL	47356412	Alu	0.333333	+	Intron
DHX34	MCG070 shCTRL	47356526	Alu	0.6	+	Intron
DLEU2	MCG070 shCTRL	50039183	Alu	0.222222	-	Intron
DNAJA1	MCG070 shCTRL	33037472	Alu	0.8	+	Intron
DNAJA1	MCG070 shCTRL	33037479	Alu	0.4	+	Intron
DNHD1	MCG070 shCTRL	6543814	Alu	0.153846	+	Intron
DNHD1	MCG070 shCTRL	6543841	Alu	0.153846	+	Intron
DNMT3A	MCG070 shCTRL	25319907	Alu	0.714286	-	Intron
DNMT3A	MCG070 shCTRL	25319908	Alu	0.714286	-	Intron
DOCK2	MCG070 shCTRL	169708665	Alu	0.4	+	Intron
DTNB	MCG070 shCTRL	25576457	Alu	0.333333	-	Intron
DTNB	MCG070 shCTRL	25576507	Alu	0.272727	-	Intron
EEF1D	MCG070 shCTRL	143590785	Alu	0.4	-	Intron
EEF1D	MCG070 shCTRL	143595450	Alu	0.333333	-	Intron
EIF3K	MCG070 shCTRL	38632167	Alu	0.375	+	Intron
ELP6	MCG070 shCTRL	47496694	Alu	0.285714	-	Intron
ELP6	MCG070 shCTRL	47496698	Alu	0.285714	-	Intron
EMC3-AS1	MCG070 shCTRL	9998836	Alu	0.4	+	Intron
EML2	MCG070 shCTRL	45619544	Nonalu	0.5	-	Intron
ENDOV	MCG070 shCTRL	80416087	Alu	0.192308	+	Intron
ENDOV	MCG070 shCTRL	80417029	Alu	0.666667	+	Intron
ENOSF1	MCG070 shCTRL	692390	Alu	0.166667	-	Intron
ENOSF1	MCG070 shCTRL	692496	Alu	0.277778	-	Intron
ENOSF1	MCG070 shCTRL	693381	Alu	0.181818	-	Intron
ENOSF1	MCG070 shCTRL	699887	Alu	0.4	-	Intron
ENSA	MCG070 shCTRL	150614119	Alu	0.2	-	Intron
ENSA	MCG070 shCTRL	150614419	Alu	0.166667	-	Intron
ENSA	MCG070 shCTRL	150614462	Alu	0.166667	-	Intron
ENSA	MCG070 shCTRL	150614905	Alu	0.363636	-	Intron
ENSA	MCG070 shCTRL	150615097	Alu	0.228571	-	Intron
ENSA	MCG070 shCTRL	150615103	Alu	0.394737	-	Intron
EPB41L2	MCG070 shCTRL	131059386	Alu	0.666667	-	Intron
ERCC8	MCG070 shCTRL	60907491	Alu	0.4	-	Intron
ERV3-1	MCG070 shCTRL	65000355	Alu	0.571429	-	Intron
EXOG	MCG070 shCTRL	38540771	Alu	0.230769	+	Intron
FADS2	MCG070 shCTRL	61849452	Alu	0.4	+	Intron
FADS2	MCG070 shCTRL	61849848	Alu	0.705882	+	Intron
FADS2	MCG070 shCTRL	61849859	Alu	0.133333	+	Intron
FADS2	MCG070 shCTRL	61849884	Alu	0.714286	+	Intron
FADS2	MCG070 shCTRL	61849974	Alu	0.555556	+	Intron
FAM13B	MCG070 shCTRL	137982432	Alu	0.181818	-	Intron
FAM13B	MCG070 shCTRL	137982437	Alu	0.181818	-	Intron
FAM168B	MCG070 shCTRL	131080904	Alu	0.4	-	Intron
FAM168B	MCG070 shCTRL	131080912	Alu	0.4	-	Intron
FAM168B	MCG070 shCTRL	131089104	Alu	0.181818	-	Intron
FAM168B	MCG070 shCTRL	131089105	Alu	0.181818	-	Intron
FAM168B	MCG070 shCTRL	131089233	Alu	0.153846	-	Intron
FAM228B	MCG070 shCTRL	24092093	Alu	0.4	+	Intron
FAM228B	MCG070 shCTRL	24094683	Alu	0.333333	+	Intron
FAM228B	MCG070 shCTRL	24094745	Alu	0.285714	+	Intron
FAM228B	MCG070 shCTRL	24094763	Alu	0.285714	+	Intron
FAM228B	MCG070 shCTRL	24094851	Alu	0.428571	+	Intron
FBF1	MCG070 shCTRL	75940110	Alu	0.4	-	Intron
FBF1	MCG070 shCTRL	75940455	Alu	0.333333	-	Intron
FBXL12	MCG070 shCTRL	9811970	Alu	0.190476	-	Intron
FBXL12	MCG070 shCTRL	9812201	Alu	0.291667	-	Intron
FBXL12	MCG070 shCTRL	9812312	Alu	0.555556	-	Intron
FBXL12	MCG070 shCTRL	9812365	Alu	0.277778	-	Intron
FBXL12	MCG070 shCTRL	9812419	Alu	0.142857	-	Intron
FBXL12	MCG070 shCTRL	9815760	Alu	0.285714	-	Intron
FBXL12	MCG070 shCTRL	9815766	Alu	0.285714	-	Intron
FBXL12	MCG070 shCTRL	9815868	Alu	0.25	-	Intron
FBXO6	MCG070 shCTRL	11669288	Alu	0.333333	+	Intron
FDPS	MCG070 shCTRL	155316140	Alu	0.2	+	Intron
FIP1L1	MCG070 shCTRL	53437071	Alu	0.4	+	Intron
FIP1L1	MCG070 shCTRL	53437072	Alu	0.4	+	Intron
FKBP3	MCG070 shCTRL	45131449	Alu	0.363636	-	Intron
FKBP3	MCG070 shCTRL	45131466	Alu	0.625	-	Intron
FNBP1	MCG070 shCTRL	129909684	Alu	0.272727	-	Intron
FNBP1	MCG070 shCTRL	129909805	Alu	0.3	-	Intron
FNBP1	MCG070 shCTRL	129920479	Alu	0.25	-	Intron
FNBP1	MCG070 shCTRL	129920484	Alu	0.25	-	Intron
FNBP1	MCG070 shCTRL	129972769	Alu	0.222222	-	Intron
FNBP1	MCG070 shCTRL	129972783	Alu	0.2	-	Intron
FNBP1	MCG070 shCTRL	130010504	Alu	0.4	-	Intron
FOXK2	MCG070 shCTRL	82585378	Alu	0.266667	+	Intron
FOXK2	MCG070 shCTRL	82594311	Alu	0.4	+	Intron
FOXK2	MCG070 shCTRL	82594321	Alu	0.285714	+	Intron
FOXK2	MCG070 shCTRL	82594351	Alu	0.428571	+	Intron
FOXK2	MCG070 shCTRL	82594383	Alu	0.4	+	Intron
FRMD8	MCG070 shCTRL	65409543	Alu	0.6	+	Intron
FTX	MCG070 shCTRL	74223895	Alu	0.157895	-	Intron
FTX	MCG070 shCTRL	74225736	Alu	0.444444	-	Intron
FTX	MCG070 shCTRL	74225742	Alu	0.5	-	Intron
FTX	MCG070 shCTRL	74226777	Alu	0.294118	-	Intron
FTX	MCG070 shCTRL	74252434	Alu	0.133333	-	Intron
FTX	MCG070 shCTRL	74252436	Alu	0.133333	-	Intron
FTX	MCG070 shCTRL	74261992	Alu	0.428571	-	Intron
FTX	MCG070 shCTRL	74265998	Alu	0.25	-	Intron
FTX	MCG070 shCTRL	74266090	Alu	0.375	-	Intron
FTX	MCG070 shCTRL	74266318	Alu	0.6	-	Intron
FTX	MCG070 shCTRL	74266333	Alu	0.6	-	Intron
FYN	MCG070 shCTRL	111666776	Alu	0.6	-	Intron
GAL3ST4	MCG070 shCTRL	100161542	Alu	0.4	-	Intron
GAL3ST4	MCG070 shCTRL	100161551	Alu	0.4	-	Intron
GALK2	MCG070 shCTRL	49219010	Alu	0.5	+	Intron
GATAD2B	MCG070 shCTRL	153904156	Alu	0.25	-	Intron
GDF1	MCG070 shCTRL	18881471	Alu	0.333333	-	Intron
GEMIN6	MCG070 shCTRL	38779335	Alu	0.222222	+	Intron
GEMIN6	MCG070 shCTRL	38779360	Alu	0.2	+	Intron
GEMIN6	MCG070 shCTRL	38779370	Alu	0.181818	+	Intron
GFOD2	MCG070 shCTRL	67683046	Alu	0.428571	-	Intron
GGA2	MCG070 shCTRL	23516293	Alu	0.4	-	Intron
GGA3	MCG070 shCTRL	75259920	Alu	0.6	-	Intron
GIT2	MCG070 shCTRL	109940623	Alu	0.222222	-	Intron
GIT2	MCG070 shCTRL	109940677	Alu	0.833333	-	Intron
GK5	MCG070 shCTRL	142185331	Alu	0.4	-	Intron
GM2A	MCG070 shCTRL	151235607	Alu	0.4	+	Intron
GMPR	MCG070 shCTRL	16255952	Alu	1	+	Intron
GMPR	MCG070 shCTRL	16256095	Alu	0.4	+	Intron
GNA11	MCG070 shCTRL	3115294	Alu	0.25	+	Intron
GNB1	MCG070 shCTRL	1803528	Alu	0.285714	-	Intron
GNB1	MCG070 shCTRL	1862748	Alu	0.2	-	Intron
GON4L	MCG070 shCTRL	155833498	Alu	0.428571	-	Intron
GPCPD1	MCG070 shCTRL	5590443	Alu	0.6	-	Intron
GPR153	MCG070 shCTRL	6255817	Alu	0.333333	-	Intron
GRAP2	MCG070 shCTRL	39961075	Alu	0.173913	+	Intron
GRAP2	MCG070 shCTRL	39962869	Alu	0.272727	+	Intron
GRB2	MCG070 shCTRL	75356426	Alu	0.384615	-	Intron
GRHPR	MCG070 shCTRL	37432599	Alu	0.1875	+	Intron
GRHPR	MCG070 shCTRL	37432622	Alu	0.266667	+	Intron
GSK3A	MCG070 shCTRL	42231626	Alu	0.181818	-	Intron
GSPT1	MCG070 shCTRL	11882157	Alu	0.333333	-	Intron
GTF2I	MCG070 shCTRL	74704513	Alu	0.333333	+	Intron
GTF2IRD2	MCG070 shCTRL	74819124	Alu	0.375	-	Intron
GTPBP1	MCG070 shCTRL	38714323	Alu	0.4	+	Intron
GUSB	MCG070 shCTRL	65975775	Alu	0.1875	-	Intron
GYS1	MCG070 shCTRL	48987893	Alu	0.5	-	Intron
HCLS1	MCG070 shCTRL	121655993	Alu	0.166667	-	Intron
HDHD3	MCG070 shCTRL	113376512	Alu	0.285714	-	Intron
HERC2P3	MCG070 shCTRL	20477338	Alu	0.5	-	Intron
HERC2P9	MCG070 shCTRL	28591369	Alu	0.363636	+	Intron
HGSNAT	MCG070 shCTRL	43165815	Alu	0.4	+	Intron
HINT1	MCG070 shCTRL	131159928	Alu	0.4	-	Intron
HINT1	MCG070 shCTRL	131159954	Alu	0.4	-	Intron
HINT1	MCG070 shCTRL	131159990	Alu	1	-	Intron
HKDC1	MCG070 shCTRL	69264116	Alu	0.8	+	Intron
HMGB3P22	MCG070 shCTRL	179686878	Alu	0.4	+	Intron
HMGB3P22	MCG070 shCTRL	179686881	Alu	0.4	+	Intron
HNRNPA1L2	MCG070 shCTRL	52630545	Alu	0.6	+	Intron
HNRNPM	MCG070 shCTRL	8479584	Alu	0.428571	+	Intron
HNRNPR	MCG070 shCTRL	23330521	Alu	0.4	-	Intron
HP1BP3	MCG070 shCTRL	20785062	Alu	0.363636	-	Intron
HP1BP3	MCG070 shCTRL	20785161	Alu	0.285714	-	Intron
HP1BP3	MCG070 shCTRL	20785191	Alu	0.333333	-	Intron
HS6ST1	MCG070 shCTRL	128239319	Alu	0.833333	-	Intron
HS6ST1	MCG070 shCTRL	128239359	Alu	0.4	-	Intron
HS6ST1	MCG070 shCTRL	128239371	Alu	0.4	-	Intron
HSF1	MCG070 shCTRL	144292777	Alu	0.275862	+	Intron
HSF1	MCG070 shCTRL	144292847	Alu	0.259259	+	Intron
HSF1	MCG070 shCTRL	144298342	Alu	0.333333	+	Intron
HSF1	MCG070 shCTRL	144306537	Alu	0.285714	+	Intron
HSH2D	MCG070 shCTRL	16155721	Alu	0.147541	+	Intron
HSPA9	MCG070 shCTRL	138573564	Alu	0.333333	-	Intron
IDH1	MCG070 shCTRL	208246860	Alu	0.181818	-	Intron
IFNAR2	MCG070 shCTRL	33231766	Alu	0.2	+	Intron
IFNAR2	MCG070 shCTRL	33231822	Alu	0.35	+	Intron
IFNAR2	MCG070 shCTRL	33231945	Alu	0.423077	+	Intron
IGHMBP2	MCG070 shCTRL	68913740	Alu	0.333333	+	Intron
IGHMBP2	MCG070 shCTRL	68913741	Alu	0.333333	+	Intron
IL12RB1	MCG070 shCTRL	18071207	Alu	0.333333	-	Intron
IL12RB1	MCG070 shCTRL	18071210	Alu	0.333333	-	Intron
ITFG1	MCG070 shCTRL	47419433	Alu	0.333333	-	Intron
ITGAL	MCG070 shCTRL	30477314	Alu	0.214286	+	Intron
ITPA	MCG070 shCTRL	3219407	Alu	0.363636	+	Intron
ITPA	MCG070 shCTRL	3220293	Alu	0.2	+	Intron
ITPA	MCG070 shCTRL	3220682	Alu	0.666667	+	Intron
JMJD6	MCG070 shCTRL	76723713	Alu	0.142857	-	Intron
JPX	MCG070 shCTRL	73996418	Alu	0.4	+	Intron
JPX	MCG070 shCTRL	73996425	Alu	0.4	+	Intron
KANSL1	MCG070 shCTRL	46148723	Alu	0.285714	-	Intron
KANSL1	MCG070 shCTRL	46160395	Alu	0.8	-	Intron
KANSL1	MCG070 shCTRL	46160432	Alu	0.4	-	Intron
KANSL1	MCG070 shCTRL	46160497	Alu	0.571429	-	Intron
KANTR	MCG070 shCTRL	53100261	Alu	0.4	+	Intron
KANTR	MCG070 shCTRL	53154689	Alu	0.333333	+	Intron
KAT6B	MCG070 shCTRL	74845035	Alu	0.6	+	Intron
KCNAB2	MCG070 shCTRL	6059387	Alu	0.444444	+	Intron
KCNAB2	MCG070 shCTRL	6059404	Alu	0.5	+	Intron
KCTD1	MCG070 shCTRL	26645445	Alu	0.4	-	Intron
KCTD3	MCG070 shCTRL	215581006	Alu	0.333333	+	Intron
KCTD3	MCG070 shCTRL	215581007	Alu	0.333333	+	Intron
KIAA0319L	MCG070 shCTRL	35469966	Alu	0.5	-	Intron
KIAA0319L	MCG070 shCTRL	35469967	Alu	0.285714	-	Intron
KIAA0319L	MCG070 shCTRL	35470033	Alu	0.5	-	Intron
KIAA0319L	MCG070 shCTRL	35470146	Alu	0.3	-	Intron
KIAA0319L	MCG070 shCTRL	35470344	Alu	0.333333	-	Intron
KIAA0319L	MCG070 shCTRL	35470345	Alu	0.333333	-	Intron
KIAA1024	MCG070 shCTRL	79422454	Alu	0.222222	+	Intron
KIAA1024	MCG070 shCTRL	79422468	Alu	0.25	+	Intron
KIF9	MCG070 shCTRL	47281444	Alu	0.285714	-	Intron
KIFC3	MCG070 shCTRL	57783610	Alu	0.4	-	Intron
KIFC3	MCG070 shCTRL	57783611	Alu	0.4	-	Intron
KIFC3	MCG070 shCTRL	57792718	Alu	0.2	-	Intron
KLHDC4	MCG070 shCTRL	87730153	Alu	0.714286	-	Intron
KLHDC4	MCG070 shCTRL	87730155	Alu	0.428571	-	Intron
KLHL5	MCG070 shCTRL	39122666	Alu	0.2	+	Intron
KMT2A	MCG070 shCTRL	118446124	Alu	0.5	+	Intron
KMT2A	MCG070 shCTRL	118446134	Alu	0.5	+	Intron
KRTCAP2	MCG070 shCTRL	155171052	Alu	0.4	-	Intron
KTN1	MCG070 shCTRL	55598417	Alu	1	+	Intron
LASP1	MCG070 shCTRL	38916703	Alu	0.6	+	Intron
LASP1	MCG070 shCTRL	38916704	Alu	0.6	+	Intron
LAT	MCG070 shCTRL	28987033	Alu	0.2	+	Intron
LAT	MCG070 shCTRL	28987129	Alu	0.428571	+	Intron
LAT	MCG070 shCTRL	28987971	Alu	0.533333	+	Intron
LCK	MCG070 shCTRL	32253486	Alu	0.8	+	Intron
LCK	MCG070 shCTRL	32253529	Alu	0.666667	+	Intron
LCK	MCG070 shCTRL	32253544	Alu	0.333333	+	Intron
LCK	MCG070 shCTRL	32258865	Alu	0.181818	+	Intron
LCK	MCG070 shCTRL	32258867	Alu	0.181818	+	Intron
LCK	MCG070 shCTRL	32258912	Alu	0.2	+	Intron
LCK	MCG070 shCTRL	32258916	Alu	0.2	+	Intron
[truncated: 2,220 more rows]
