# Supplementary material for: ADAR1 drives stemness of leukemia initiating cells in T-cell acute lymphoblastic leukemia via attenuating immunogenic dsRNA sensing
Source: Research Square preprint supplement (doi:10.21203/rs.3.rs-2444524/v1), 2023-01-17
Supplement: Supplementary file 2 [file 6199d2daac35f5972827d20b.xlsx]

## Sheet: Sheet1
Primers	Sequence (5' to 3')
ADAR1 fw (total ADAR1)	TGC TGC TGA ATT CAA GTT GG
ADAR1 rev (total ADAR1)	TCG TTC TCC CCA ATC AAG AC
ADAR1 fw (ADAR1p150)	AAC GAA AGC GAA ATT GAA CC
ADAR1 rev (ADAR1p150)	GGG TGT AGT ATC CGC TGA GG
ADAR1 fw (ADAR1p110)	GAC TGA AGG TAG AGA AGG CTA CG
ADAR1 rev (ADAR1p110)	TGC ACT TCC TCG GGA CAC
ISG15 fw	GGC TGG GAG CTG ACG GTG AAG
ISG15 rev	GCT CCG CCC GCC AGG CTC TGT
PKR fw	TGG AAA GCG AAC AAG GAG TAAG
PKR rev	CCA TCC CGT AGG TCT GTG AA
RIG-I fw	CTT TTT CTC AAG TTC CTG TTG GA
RIGI rev	TCC CAA CTT TCA ATG GCT TC
MDA5 fw	GCC TAA TTT ACA GCA ACC ATG A
MDA5 rev	TCA TCA ATG GAT AAC TCC CAT GT
MATR3 fw	GGA GAA CTG AAG AAG GCC CT
MATR3 rev	GCA CTG GGT TGA GAC TAG GA
CORO1A fw	TTC CCT CAA GGA TGG CTA CGT
CORO1A rev	CCT CCA GCC GAG ACA CGG
S100A9 fw	TCCTCGGCTTTGACAGAGTG
S100A9 rev	AGACTTTATTTGGCCCCAGCC
S100A8 fw	AAACACTCTG TGTGGCTCCT
S100A8 rev	TTGGAGGAAGAGACTTTATTTGG
hHPRT fw	TCA GGG ATT TGA ATC ATG TTT GTG
hHPRT rev	CGA TGT CAA TAG GAC TCC AGA TG
