# Supplementary material for: ADAR1 drives stemness of leukemia initiating cells in T-cell acute lymphoblastic leukemia via attenuating immunogenic dsRNA sensing
Source: Research Square preprint supplement (doi:10.21203/rs.3.rs-2444524/v1), 2023-01-17
Supplement: Supplementary file 3 [file a11bdbd2289759ef0fdafe4c.xlsx]

## Sheet: DE scRNA-seq normal Tcell ATO
symbol	m1_0 (shCTRL)	m2_0 (shADAR1)	fold change	lfdr
ND3	5.55085	6.91968	2.5826	1.7567e-56
ND4L	1.34696	2.61012	2.4002	1.88324e-26
RPL13	6.16072	5.51313	-1.56655	2.97362e-15
RPS9	5.14496	4.47856	-1.5871	2.97362e-15
RPS5	4.99721	4.29235	-1.62998	6.41403e-15
RPL29	5.27195	4.66981	-1.51796	1.17207e-14
FTL	4.18684	5.34818	2.23665	1.40997e-14
RPSA	5.09065	4.43461	-1.57575	1.53747e-14
RPL18A	5.51666	4.83474	-1.60427	1.30394e-13
NA	0.155015	1.93866	3.44294	1.77687e-13
RPS16	5.1718	4.54501	-1.54412	3.13488e-13
MNDA	0.165733	1.67758	2.85175	1.65176e-12
RPL18	5.11147	4.58232	-1.44307	2.07319e-12
ND2	4.79918	5.49955	1.62492	3.67905e-12
CEACAM8	0.0560322	1.21663	2.2355	6.41374e-12
GCA	0.282507	1.51685	2.35274	6.60056e-12
LYZ	0.56211	3.17946	6.13623	7.55445e-12
RPL3	5.59908	4.91152	-1.61055	7.90745e-12
CLEC12A	0.0894291	0.948598	1.81399	1.67277e-11
S100P	0.107353	1.21739	2.15852	1.81644e-11
NA	4.87223	4.32354	-1.46275	2.08235e-11
CD24	0.136465	1.45313	2.49089	2.74218e-11
RPS28	5.19827	5.69106	1.40717	2.87789e-11
BPI	0.0672299	1.32778	2.39588	3.34412e-11
RPL39	5.15282	5.82146	1.58957	3.49108e-11
RPS2	6.16042	5.4708	-1.61286	3.83967e-11
RPS3	5.57658	5.00143	-1.48983	4.59374e-11
BASP1	0.193922	1.07178	1.83764	4.83772e-11
ACTN1	0.0924187	0.891688	1.74022	5.20321e-11
RPS18	5.94737	5.27488	-1.59382	5.96669e-11
ANXA3	0.0766039	0.961217	1.84627	7.71232e-11
RAB31	0.0479711	0.832291	1.72228	9.30782e-11
NA	3.7794	4.29777	1.43234	1.40618e-10
TRDC	3.50201	2.38394	-2.17056	1.70864e-10
MS4A3	0.0567646	1.17456	2.17016	3.09755e-10
RPL10A	4.84271	4.25186	-1.50613	3.28809e-10
CORO1A	3.76872	2.83817	-1.906	3.52243e-10
RPL8	4.88945	4.423	-1.3817	4.45036e-10
CEACAM6	0.0387509	1.09654	2.08174	5.93783e-10
RPLP0	5.20692	4.60427	-1.51851	6.48531e-10
SERPINB10	0.0365018	0.681091	1.56329	1.09795e-09
UGCG	0.24392	1.15888	1.88552	1.11312e-09
CHI3L1	0.0590337	1.03597	1.96828	1.32638e-09
ABCA13	0.024706	0.669804	1.56385	1.4238e-09
GRN	0.397727	1.40512	2.01027	1.56722e-09
STOM	0.269575	1.17418	1.87203	1.70435e-09
NDUFB1	1.68632	2.35306	1.58748	1.86214e-09
S100A9	0.559338	2.74059	4.53546	2.23637e-09
PET100	0.985617	1.62115	1.55351	5.08213e-09
B4GALT5	0.189435	0.903208	1.64009	5.32795e-09
TYROBP	0.350118	1.37048	2.02842	5.60245e-09
NA	0.102028	0.750005	1.56697	5.76663e-09
S100A8	0.840903	3.53627	6.47717	6.0318e-09
MTRNR2L8	0.148191	0.628797	1.39533	6.82236e-09
RPL13A	5.2027	4.67655	-1.44007	7.32467e-09
RPL7A	5.33508	4.84967	-1.39998	7.64974e-09
CSTA	0.112294	1.05219	1.91839	1.1087e-08
NPC2	0.566965	1.4045	1.787	1.29309e-08
CSF3R	0.0355307	0.567285	1.44569	1.29647e-08
CYBB	0.0918719	0.979015	1.84951	1.45511e-08
NA	2.27409	1.67301	-1.51685	1.60134e-08
COL17A1	0.0141803	0.518976	1.41892	1.68624e-08
RPL15	5.36335	4.90903	-1.37014	1.8919e-08
RPL19	5.7289	5.24942	-1.39424	2.23526e-08
NA	2.6165	1.93332	-1.60568	6.06167e-08
RETN	0.294035	1.79428	2.82891	6.16175e-08
RPL28	6.00815	5.60662	-1.32091	7.01773e-08
NCF1	0.184473	0.889472	1.63014	7.69741e-08
CEBPE	0.032635	0.515659	1.39767	8.24953e-08
IL32	4.46832	3.06456	-2.6459	8.25519e-08
CD7	2.94955	1.96462	-1.97922	8.56932e-08
PGLYRP1	0.0579094	0.906937	1.80129	9.26893e-08
NA	2.02592	2.58901	1.47743	1.096e-07
RNASE2	0.0750729	0.886459	1.7549	1.14076e-07
RPL23A	5.24667	4.77256	-1.38906	2.58587e-07
AZU1	0.124629	1.46126	2.52561	2.61813e-07
BST1	0.0617456	0.542207	1.39519	2.78934e-07
RPS15	5.39268	5.03469	-1.28164	2.84093e-07
TPP1	0.294992	0.930779	1.55378	2.94726e-07
SIVA1	2.60492	1.92997	-1.59654	2.99333e-07
PGD	0.985419	1.70552	1.6473	3.04174e-07
LDHB	3.86149	3.24369	-1.53453	3.16587e-07
SLPI	0.0454841	0.80785	1.69627	3.17096e-07
RPL36A	2.22139	2.76317	1.45577	3.26194e-07
DEFA4	0.138065	1.80579	3.17713	3.97838e-07
RPS4X	5.88172	5.41092	-1.38588	4.61342e-07
LPCAT2	0.186674	0.725088	1.45238	6.00626e-07
LTB	4.70154	3.40841	-2.45058	6.05191e-07
ATP8B4	0.121657	0.629639	1.42206	6.40942e-07
NA	7.6011	7.96185	1.28409	6.56328e-07
LITAF	0.250865	0.877485	1.54394	6.88405e-07
TRBC1	1.48585	0.787529	-1.62262	7.06194e-07
CYP4F3	0.0134963	0.426731	1.33167	8.79547e-07
LEF1	2.05933	1.26228	-1.73755	8.92824e-07
CEBPD	0.0746473	0.606777	1.44606	1.02069e-06
RPS19	5.58955	5.12364	-1.38119	1.20887e-06
CD3E	2.12482	1.37528	-1.68126	1.47182e-06
ND4	6.4894	6.88762	1.31789	1.51035e-06
OLR1	0.0139066	0.501762	1.40236	1.98421e-06
IRF2BP2	0.648654	1.30341	1.57435	2.18509e-06
ELANE	0.0757243	1.07637	2.00089	2.19703e-06
NA	2.81011	2.21679	-1.50871	2.25264e-06
CD3D	3.64084	2.62077	-2.02802	2.35918e-06
LIMD2	2.49279	1.86755	-1.54246	2.61055e-06
STMN1	5.0072	4.0897	-1.88885	2.7936e-06
VSTM1	0.0138528	0.366411	1.27682	2.7954e-06
CLEC5A	0.0109968	0.381134	1.29248	2.81553e-06
RNASE3	0.0360615	0.618893	1.49779	2.91368e-06
CDA	0.038375	0.506093	1.38292	2.97711e-06
RPL4	4.16521	3.71124	-1.3698	2.9841e-06
NA	0.0190575	0.408578	1.30996	3.0001e-06
SLC25A6	3.50348	3.00781	-1.40998	3.21491e-06
ATP8	0.430184	0.942886	1.42672	3.22793e-06
FCN1	0.102682	0.87041	1.70259	3.50619e-06
NA	2.69636	2.25557	-1.35735	3.74861e-06
DEFA3	0.160215	1.86397	3.25748	3.81894e-06
MCEMP1	0.0361934	0.449346	1.33159	4.0579e-06
MPO	0.175238	1.43997	2.40283	4.11093e-06
PSTPIP2	0.251742	0.727121	1.39028	4.24324e-06
SUCNR1	0.0197716	0.398813	1.30048	4.96231e-06
ND1	6.10905	6.51096	1.32126	5.1562e-06
GSN	0.141199	0.727985	1.5019	6.13312e-06
RGS18	0.0822864	0.452286	1.29235	6.37904e-06
GTF3A	2.38731	1.85746	-1.44378	6.83348e-06
LCK	2.06257	1.40421	-1.57829	6.86261e-06
EVL	2.81437	2.14459	-1.59083	7.36167e-06
PPIA	4.8633	4.4077	-1.37135	7.74284e-06
LIN7A	0.0146083	0.324424	1.23955	8.06298e-06
SERPINB1	1.23959	2.10998	1.82815	9.10957e-06
PRAM1	0.185252	0.683464	1.41246	1.0299e-05
IRAK3	0.159427	0.630623	1.38626	1.1487e-05
PYGL	0.0548792	0.512823	1.37358	1.28083e-05
FCGR1A	0.0121891	0.275842	1.20051	1.5964e-05
ARG1	0.0135323	0.375762	1.28541	1.60704e-05
NFAM1	0.017487	0.28547	1.20412	1.66557e-05
CEACAM3	0.0309936	0.367503	1.2627	1.67017e-05
CARHSP1	2.14566	1.55582	-1.50508	1.68934e-05
CD302	0.0708823	0.455211	1.30525	1.73889e-05
TMSB10	5.53168	4.88556	-1.56496	1.76924e-05
MZT2B	3.07429	2.65658	-1.3358	1.86752e-05
SRGN	2.03726	3.6028	2.9599	1.88061e-05
AMPD3	0.0673236	0.419957	1.27689	2.02006e-05
AGTRAP	0.102346	0.513518	1.32977	2.35559e-05
NCL	4.1586	3.53692	-1.53867	2.38291e-05
NA	5.09047	4.80515	-1.21869	2.41549e-05
MTRNR2L12	0.0907056	0.377364	1.21981	2.41713e-05
PIK3AP1	0.182912	0.616331	1.35043	2.46407e-05
CEACAM1	0.0500919	0.44246	1.31255	2.48503e-05
JDP2	0.0212565	0.297839	1.21132	2.52977e-05
PRTN3	0.154266	1.28763	2.1937	2.54543e-05
TSPO	1.74927	2.56699	1.76262	2.55074e-05
MSRB1	0.25551	0.757649	1.41631	2.6967e-05
PTMA	6.69461	6.06113	-1.55131	2.74522e-05
P2RY13	0.0480559	0.44346	1.31531	2.75894e-05
SNRPB	3.03063	2.54323	-1.40192	2.80308e-05
LTA4H	0.442024	1.09586	1.57335	2.80904e-05
GPI	0.783414	1.31818	1.4487	2.82179e-05
ASAH1	0.464879	1.06308	1.51382	2.87668e-05
HSP90AA1	4.77175	4.20963	-1.47644	3.05346e-05
LAMP2	0.512012	1.06442	1.46653	3.1068e-05
RPL14	4.95381	4.56542	-1.30893	3.25257e-05
APP	0.287665	0.771642	1.39859	3.42546e-05
PSMB8	2.40195	1.92392	-1.39284	3.43801e-05
CPNE3	0.566343	1.24911	1.60522	3.58308e-05
RPS6	5.53874	5.11739	-1.33917	3.84318e-05
HSP90AB1	4.08022	3.4653	-1.53148	3.92706e-05
SORL1	0.238866	0.692453	1.36944	4.3638e-05
C12orf75	2.54091	1.82421	-1.64342	4.38264e-05
HP	0.0274552	0.483824	1.37208	4.40967e-05
PRDX2	2.59009	1.96867	-1.53839	5.39044e-05
RPS14	5.59591	5.25542	-1.26619	5.92448e-05
NDUFA3	1.06971	1.5538	1.3987	6.16112e-05
APRT	2.48289	2.05412	-1.34609	6.37822e-05
RPL17	0.799923	1.29267	1.40712	6.38088e-05
GRINA	0.1317	0.496667	1.28785	6.48397e-05
C3AR1	0.105768	0.530134	1.34198	7.25033e-05
TMEM170B	0.075141	0.382725	1.23763	7.34873e-05
RAB13	0.20924	0.687948	1.39349	7.49853e-05
CYSTM1	0.182176	0.632922	1.36675	7.83815e-05
ACSL1	0.0396725	0.310383	1.2064	8.29774e-05
TSPAN2	0.148989	0.580182	1.34835	8.79599e-05
NA	0.158169	0.554701	1.31634	8.97271e-05
FUS	3.00329	2.54627	-1.3727	9.80704e-05
RPS12	6.18076	5.81435	-1.28914	9.82486e-05
FCER1G	0.747623	1.67426	1.90084	9.92891e-05
SH2D1A	0.939519	0.426138	-1.42739	0.00010073
DMXL2	0.172094	0.610938	1.35552	0.000106565
CMTM6	0.85464	1.42389	1.48375	0.000109635
LILRA2	0.0335966	0.319338	1.21904	0.000112267
NCF2	0.0587364	0.430166	1.29363	0.000112504
SLC25A5	3.63072	3.2025	-1.34557	0.000115093
NA	2.85731	2.40732	-1.36604	0.000115576
HMGA1	2.73001	2.15915	-1.48542	0.000117211
SLC40A1	0.229052	0.763162	1.44805	0.000123988
ITGAM	0.0815279	0.466656	1.30598	0.000131273
GUK1	2.34642	1.85064	-1.41008	0.000131396
NA	0.0711824	0.442681	1.2937	0.000135676
TCF7	2.40381	1.72895	-1.59644	0.000140145
SCPEP1	0.0790502	0.412906	1.26038	0.000143393
IL6R	0.0335345	0.30686	1.20859	0.000149899
NA	2.60742	2.20903	-1.31804	0.000152056
NA	0.286487	0.859531	1.48766	0.000155469
EEF1B2	4.25248	3.81966	-1.34988	0.000157369
ANXA4	0.170541	0.523584	1.27725	0.000159821
CRISP3	0.0259367	0.529773	1.41798	0.000169596
CITED2	0.28425	0.786728	1.41664	0.000184219
COX4I1	3.474	3.07446	-1.31909	0.000187266
DAZAP2	1.24416	1.782	1.4518	0.000189935
CSGALNACT1	0.0579932	0.363723	1.23604	0.000192418
SIRPB1	0.0284788	0.27535	1.18663	0.000197389
RAB3D	0.0571641	0.334905	1.2123	0.0002072
LCN2	0.120578	1.09768	1.9685	0.00021598
FNDC3B	0.122433	0.463925	1.26707	0.000217502
ALOX5AP	0.97787	1.6611	1.60573	0.000225822
ELL2	0.142175	0.465456	1.25117	0.00023119
CD1E	1.95277	1.16945	-1.72109	0.000239968
TCN1	0.00495843	0.266976	1.19915	0.000269642
RPS23	6.04616	5.67159	-1.29645	0.000275381
DOK3	0.123163	0.464924	1.2673	0.000316701
FAR2	0.179574	0.53953	1.28339	0.000328586
RTN3	0.709886	1.22225	1.42639	0.000328714
ALDH2	0.156723	0.550589	1.31391	0.00034121
PLXNC1	0.0939869	0.395314	1.23228	0.000362669
HINT1	3.9875	3.61864	-1.29133	0.000371879
LRRC75A	0.551266	1.14514	1.50929	0.000394664
ACTN4	0.808713	1.313	1.41842	0.000403806
CITED4	0.0711085	0.361132	1.22266	0.000432252
CREG1	0.216884	0.59202	1.29696	0.000434844
ARHGAP24	0.0575735	0.333471	1.21075	0.0004447
RPL24	4.6807	4.38572	-1.22687	0.000462713
CPEB4	0.158803	0.550954	1.31235	0.000472237
CHCHD2	4.04058	3.68978	-1.27526	0.00047487
ENTPD1	0.110531	0.491623	1.30233	0.000478304
CD247	2.11663	1.48094	-1.55368	0.000521521
DENND3	0.0675859	0.321687	1.19259	0.000547136
LTF	0.107478	0.974218	1.82354	0.000554116
GNS	0.119633	0.427578	1.23794	0.000559396
LSM4	2.40166	1.92349	-1.39297	0.000561492
CXCL1	0.0093762	0.236567	1.17055	0.000568462
RPL37	5.04282	5.34783	1.23543	0.000583928
BTF3	4.02912	3.68599	-1.2685	0.000597759
PIK3CB	0.114586	0.391119	1.21128	0.000638394
CKAP4	0.039763	0.364623	1.25254	0.000641687
ID3	0.638996	0.187635	-1.36733	0.00064282
PSMD8	2.27156	1.86084	-1.32936	0.000678365
RXRA	0.0841818	0.368892	1.21817	0.000680733
PADI4	0.0655404	0.464489	1.31855	0.000722877
ERG	0.0416032	0.280879	1.1804	0.000744964
BRI3	0.919234	1.55192	1.55045	0.000748985
RAB27A	0.693538	1.2156	1.43601	0.000750172
RPL41	5.29463	5.61337	1.24724	0.000781091
SUB1	3.41806	3.06666	-1.2758	0.000855629
CTSD	0.909222	1.49436	1.50019	0.000926931
OLFM4	0.0654238	0.863	1.73818	0.000993798
FPR2	0.0246331	0.282708	1.19588	0.00101307
SLC16A3	0.272573	0.664291	1.31196	0.00102824
PSIP1	2.09661	1.62045	-1.39104	0.00105716
NASP	2.80008	2.25269	-1.46144	0.00109762
PARK7	3.026	2.66197	-1.28702	0.00111319
NA	0.328046	0.706291	1.29976	0.00114258
NDUFA4	3.33802	3.01268	-1.25296	0.00116601
PPP1R14B	2.55748	2.04876	-1.42279	0.00116787
PLCG2	0.25443	0.595794	1.26695	0.00117713
GYG1	0.400337	0.835783	1.35233	0.00122746
MSRB3	0.118243	0.426749	1.23842	0.00123836
RPS3A	5.66125	5.31911	-1.26763	0.00124671
PLBD1	0.0343074	0.360801	1.25396	0.00125685
ADGRG3	0.0401106	0.267924	1.17106	0.00131402
RPS29	4.59982	4.93499	1.26152	0.00135237
NA	3.40134	3.00073	-1.32006	0.0013745
CCT3	2.40174	1.94881	-1.36882	0.00139469
IDH2	2.48154	2.0224	-1.37472	0.0014195
NA	1.41105	0.96733	-1.36011	0.00143883
CAT	1.13457	1.67575	1.45516	0.0014979
CD33	0.106484	0.376101	1.20549	0.00157037
QSOX1	0.220835	0.56542	1.26979	0.00158791
GNAS	3.75974	3.41217	-1.27241	0.00160394
HCK	0.0566611	0.347937	1.22372	0.00163456
CST7	0.286895	0.885693	1.51445	0.00168629
RPS7	5.16619	4.87154	-1.22659	0.00170692
RPL10	6.00365	5.61182	-1.31206	0.00183798
UBB	3.52899	3.12996	-1.31862	0.00192625
MARCKSL1	2.4612	1.97004	-1.40557	0.0019445
MCTP1	0.0848918	0.318888	1.17609	0.0020541
SLC38A2	0.970422	1.39804	1.34501	0.00211666
PTX3	0.0141111	0.241023	1.17033	0.00215349
PSMB6	1.98141	1.6151	-1.28906	0.00216012
NA	2.44239	1.9944	-1.36413	0.00218493
LMO2	0.102082	0.4591	1.28078	0.00220781
VCL	0.169473	0.466742	1.22882	0.00223977
SPI1	0.333726	0.788634	1.3707	0.00224291
CTSG	0.0813418	0.562018	1.3954	0.00231434
RAN	3.86126	3.37054	-1.40515	0.00239294
SVIP	0.720379	1.18413	1.37912	0.00249234
IRS2	0.158639	0.498352	1.2655	0.00252761
NA	0.728412	1.24839	1.43394	0.0025813
LRRK2	0.024181	0.244638	1.1651	0.00258335
LSM5	2.21355	1.80433	-1.32796	0.00261859
HHEX	0.117335	0.418667	1.23228	0.00262641
RPL27A	4.15028	3.83041	-1.24822	0.0026763
STXBP5	0.249441	0.61731	1.29044	0.00271316
MBOAT2	0.337259	0.708577	1.29353	0.00279136
MANBA	0.177291	0.471726	1.2264	0.00297382
TM9SF2	0.694594	1.11819	1.34127	0.00299489
RRAGD	0.154051	0.441226	1.22025	0.0030479
EIF3K	2.8058	2.50057	-1.23562	0.00306183
FUT4	0.108902	0.378604	1.20556	0.00306207
EEF1D	3.23578	2.92531	-1.24011	0.00309878
TMEM154	0.191001	0.500399	1.23919	0.00317944
ARL6IP4	2.54986	2.19547	-1.27844	0.00318291
BEX1	0.0259616	0.347953	1.25005	0.00324755
EIF3F	2.51837	2.16344	-1.27892	0.00325765
C19orf53	2.20357	1.82716	-1.2981	0.00332615
LY75	0.100085	0.340376	1.18123	0.00341732
MEGF9	0.157011	0.45441	1.22893	0.00351409
ORM1	0.0128531	0.230513	1.16285	0.0035378
NACA	4.74097	4.45951	-1.21542	0.0036235
ATP11A	0.0824568	0.302319	1.16462	0.00377781
CCPG1	0.275548	0.639037	1.28653	0.00379658
C19orf38	0.0750121	0.316315	1.18206	0.00379911
S100A6	1.59795	2.31733	1.64647	0.0038358
LAMP1	0.630109	1.02236	1.31244	0.0038581
KDM1B	0.102092	0.348357	1.18613	0.00386945
PLAUR	0.089884	0.334967	1.18516	0.00402918
ACTR2	1.95818	2.39377	1.35247	0.00414255
MMP8	0.0166528	0.332329	1.2446	0.00415003
PSME2	2.84595	2.41613	-1.34706	0.00440055
NA	2.24029	1.71656	-1.43767	0.00445375
PNISR	2.2822	1.86895	-1.33168	0.00456583
MFSD1	0.253062	0.584487	1.25826	0.00457241
BCL2A1	0.0808513	0.372545	1.22408	0.00463852
HNRNPD	3.20465	2.79112	-1.33194	0.00466716
APMAP	0.404028	0.795203	1.31146	0.00470096
EDF1	2.28412	1.95939	-1.25243	0.00471083
RPL11	5.38517	5.09596	-1.22196	0.00474899
KRTCAP2	0.462156	0.801717	1.26537	0.00478569
HSPA1A	0.265001	0.607989	1.26838	0.00486963
LTB4R	0.112476	0.371317	1.19652	0.00497461
CAMP	0.0830593	0.740528	1.57731	0.00501723
GBE1	0.176797	0.452232	1.21036	0.00521305
ANTXR2	0.17539	0.442295	1.20322	0.00526127
COX17	1.58882	1.99275	1.32311	0.00540865
FES	0.252024	0.561117	1.23893	0.00543577
ROMO1	1.30047	1.67804	1.29916	0.00545103
PRKCD	0.140697	0.388954	1.18777	0.0054593
ATP6AP2	0.760647	1.16748	1.32577	0.00551882
ND5	4.1118	4.40528	1.22559	0.00557884
CTSS	0.544615	1.02336	1.39353	0.00571826
C12orf57	2.16598	1.7236	-1.35884	0.00577867
LAPTM5	1.14791	1.66406	1.43013	0.00585546
CFD	0.0504287	0.301632	1.1902	0.00602876
PTPRJ	0.0672187	0.278264	1.15753	0.00612539
NFE2	0.107182	0.375332	1.20426	0.00623939
PDZD8	0.315553	0.667775	1.27653	0.00632117
KLF7	0.113143	0.360859	1.18733	0.00643753
FDPS	2.62931	2.19267	-1.35345	0.00649437
MRPL54	1.58376	1.22955	-1.27828	0.0065083
TRIQK	0.129711	0.36313	1.17562	0.00653045
TRBC2	1.85342	1.36862	-1.3994	0.00667084
YBX1	4.42395	4.04346	-1.30178	0.0068719
C20orf27	0.538432	0.951871	1.33186	0.00696773
SLC36A4	0.352368	0.714907	1.28569	0.00732291
JUNB	0.683502	1.15174	1.38342	0.00749718
DYNLL1	3.12949	2.72726	-1.32155	0.00754899
RANBP1	3.03971	2.54695	-1.40714	0.00757275
CD99	2.70306	2.15019	-1.46701	0.00773233
PTPN7	2.48388	1.97576	-1.4222	0.00786978
RPS27A	5.61386	5.33856	-1.21025	0.00824205
SMC1A	2.21817	1.74406	-1.38906	0.00830728
AURKAIP1	2.02192	1.67043	-1.27588	0.00843755
PTBP3	1.01256	1.39455	1.30314	0.0085537
SKP1	3.11643	2.77131	-1.27026	0.00868351
CTNNA1	0.100322	0.312417	1.15837	0.00884692
NA	0.256529	0.568713	1.24159	0.00896578
SPN	2.0896	2.48174	1.31234	0.00901616
ANP32B	3.64461	3.24825	-1.31619	0.00906497
RPLP1	6.70762	6.41746	-1.22277	0.00912427
APAF1	0.160734	0.409729	1.18838	0.00932096
CSF2RB	0.129586	0.452419	1.25078	0.00947464
CD1A	0.752742	0.343667	-1.32783	0.0095238
NA	0.261323	0.589943	1.25581	0.00980147
NKG7	1.94294	2.69664	1.68612	0.00981837
EVI2B	0.713473	1.17073	1.37293	0.00984168
NA	0.796103	0.340855	-1.37102	0.00998449
TNFSF13B	0.0702126	0.304541	1.17636	0.0101812
LILRA5	0.0292794	0.241959	1.15884	0.0103425
PLSCR1	0.485908	0.854914	1.29146	0.0104442
LSM2	1.72474	1.37206	-1.27694	0.0105572
MAP3K8	0.317608	0.650368	1.25942	0.0105669
PEBP1	2.67933	2.29727	-1.3032	0.0106665
MZB1	2.08309	1.47629	-1.52288	0.0106867
SNX18	0.0990139	0.308931	1.15662	0.0108296
NPM1	4.63128	4.16685	-1.37978	0.0108564
SLC25A3	3.55732	3.25918	-1.22956	0.0109186
FLVCR1	0.188365	0.447434	1.19671	0.0109738
NDUFS6	2.45113	2.10795	-1.26855	0.0111618
TYMP	0.41411	0.82085	1.32569	0.0112243
OCIAD2	1.76456	1.37823	-1.30706	0.0118781
FLOT2	0.332144	0.644214	1.24149	0.0118908
ZNF706	1.99739	1.61057	-1.30751	0.0119818
RPS21	4.48754	4.76128	1.20894	0.012123
WSB1	1.02503	1.4614	1.35319	0.0121674
CEBPB	0.433102	0.846704	1.33201	0.0122375
STXBP2	0.50632	0.913151	1.32577	0.0123778
CFP	0.099784	0.403342	1.23418	0.0128115
AP3S1	0.820975	1.20402	1.30409	0.0129858
PTK2B	0.329651	0.661597	1.25871	0.0135313
SET	3.83694	3.45496	-1.30313	0.0136409
EDEM3	0.275364	0.562106	1.21988	0.0136458
GPD2	0.126983	0.350374	1.16747	0.0137188
EMB	1.171	1.59941	1.34575	0.0139874
RNF130	0.616695	1.01015	1.31354	0.0141832
ALOX5	0.0836064	0.350249	1.20301	0.0143574
OGFRL1	0.168602	0.423099	1.19292	0.0146919
CD52	1.93343	1.25124	-1.60458	0.0149958
DRAP1	2.20381	1.86036	-1.26879	0.0154263
CD3G	2.12955	1.49265	-1.55499	0.015485
FOS	0.0897391	0.354363	1.20132	0.0156496
CLTC	1.10344	1.45309	1.27425	0.015681
CD63	1.9278	2.47567	1.46192	0.0157398
ALPK1	0.117418	0.339077	1.16607	0.0158272
MYL6	3.90224	4.24227	1.26578	0.016018
NA	0.763034	1.11344	1.27492	0.0160266
RPL34	5.03838	5.32828	1.22256	0.0160343
GNAQ	0.812613	1.19314	1.30182	0.0161475
BIN1	0.66718	0.338553	-1.25582	0.0164995
UBXN1	1.76651	1.41721	-1.27394	0.0167883
SCAND1	1.98654	1.61726	-1.29171	0.0168883
PRMT1	2.13946	1.73957	-1.31941	0.0169939
ATP6AP1	0.474037	0.790174	1.24499	0.0174341
ARL4C	2.43931	1.8651	-1.48887	0.0174615
SRSF7	2.90325	2.4788	-1.34206	0.0175113
UQCR11	2.09659	2.39009	1.22562	0.0175323
ZDHHC19	0.0556862	0.254208	1.14752	0.017624
NCF4	0.820089	1.21415	1.31408	0.0176934
CCDC167	1.49369	1.11391	-1.30114	0.0182289
EIF4EBP2	0.750291	1.0802	1.25694	0.0185243
RPL5	4.97573	4.67867	-1.22864	0.0185382
STX3	0.102467	0.328355	1.1695	0.0186248
RP2	0.175558	0.416284	1.18159	0.0188667
GABARAP	0.171707	0.388434	1.16209	0.0190655
HIF1A	0.631964	0.998047	1.28885	0.0192335
RASSF2	0.217103	0.489617	1.20791	0.0192856
S100A12	0.0846877	0.601955	1.43124	0.0194896
ATXN1	0.144857	0.36546	1.16522	0.0195507
ARL8B	0.532761	0.879498	1.27168	0.0197325
SHOC2	0.345215	0.643156	1.22939	0.0198094
PPM1G	2.3382	1.96909	-1.29156	0.0199112
SSBP4	1.47772	1.10344	-1.29619	0.0199879
CA2	0.0364042	0.274167	1.17916	0.020129
HK2	0.147731	0.358413	1.15724	0.0219288
OSBPL1A	0.163497	0.399898	1.17805	0.0220524
TNFAIP2	0.0811864	0.338762	1.19547	0.022744
RPS10	3.37205	3.63091	1.19653	0.0228703
NPTN	0.268963	0.543681	1.20976	0.0231671
MLC1	0.0980038	0.288143	1.14087	0.0242661
LGALS3	0.282101	0.648909	1.2895	0.0245591
FBXO9	0.601581	0.948455	1.2718	0.0247817
DNAJC5	0.208904	0.463774	1.19323	0.024838
TMEM160	1.58168	1.24084	-1.26649	0.024909
FAR1	0.387604	0.700731	1.2424	0.025074
LYST	0.463018	0.861185	1.31783	0.0256454
PPM1F	0.120578	0.305242	1.13655	0.0259098
SERPINA1	0.0461946	0.263899	1.16288	0.0264475
CD68	0.0754714	0.302575	1.17048	0.0264855
NA	2.12872	1.71681	-1.33044	0.0267794
ILF2	2.39863	2.03948	-1.28268	0.0271342
GALNT2	1.58196	1.1432	-1.35544	0.0275278
NDUFA1	1.96856	2.26279	1.22623	0.0276712
SDCBP	0.868965	1.25684	1.30847	0.0277972
NDRG1	0.149772	0.366776	1.16232	0.0286838
ABHD2	0.272438	0.542739	1.20606	0.0289128
PSMB1	2.652	2.35242	-1.23079	0.0290305
SEC62	1.44209	1.7895	1.27227	0.0290629
DSTYK	0.119892	0.310012	1.14086	0.0295138
SLC15A4	0.189573	0.436151	1.18639	0.0298709
NDUFV2	2.3342	2.01007	-1.25191	0.0300403
TMEM258	1.8989	2.19698	1.22951	0.030359
LIMS1	0.892693	1.2555	1.28593	0.030561
HSPA8	3.66551	3.24392	-1.33941	0.0305823
GBA	0.216394	0.467481	1.1901	0.0314067
SCGB3A1	0.15031	0.413208	1.19989	0.0314715
CDC42EP3	0.1411	0.389118	1.18757	0.0315479
SPOPL	0.124433	0.330081	1.1532	0.031651
CD59	0.694689	1.08352	1.30933	0.0318577
EEF1A1	6.62249	6.34398	-1.21294	0.0319492
NA	2.3599	2.67626	1.24518	0.0321961
MARCKS	1.56953	2.01237	1.35928	0.0324532
PRRC2C	2.75265	2.42206	-1.25753	0.0330474
NA	1.02984	1.36365	1.26034	0.03326
EIF5A	3.41674	3.04678	-1.29231	0.0332828
GNB4	0.333904	0.601778	1.20403	0.0333797
ENPP4	0.13526	0.352121	1.1622	0.0334423
RALB	0.20249	0.433365	1.17355	0.0342401
ATP6V0B	1.61724	1.95301	1.26205	0.0342792
NOSIP	1.3853	0.955088	-1.34744	0.0345285
CD46	0.704022	1.03972	1.26199	0.0352636
MXD1	0.145669	0.363192	1.16274	0.0352891
BNIP2	0.763382	1.08892	1.25313	0.0374136
BLVRB	0.149085	0.533061	1.30493	0.0374236
NCR3	0.809244	0.434708	-1.29642	0.0375647
SSBP1	2.38439	2.06647	-1.24654	0.037636
COX5A	2.66727	2.37744	-1.2225	0.0378568
AGO4	0.134623	0.3316	1.14629	0.037901
RPL37A	4.77593	5.02603	1.18929	0.0379031
SNRPD3	2.39003	2.0714	-1.24715	0.0380268
LYN	0.367583	0.70123	1.2602	0.0380348
RPL32	5.57213	5.32151	-1.18971	0.0382924
RPS26	4.7561	4.95643	1.14896	0.0386727
APBA2	0.126205	0.345236	1.16395	0.0390954
MYO1F	0.484422	0.830453	1.27106	0.0392818
NFKBIZ	0.173446	0.448466	1.21001	0.0396372
MFSD14B	0.492329	0.801221	1.23876	0.0401192
NA	2.75633	2.46646	-1.22253	0.0401426
RAB32	0.534399	0.932866	1.31811	0.0412271
NSUN5	0.550299	0.8951	1.26998	0.0414929
TMBIM4	0.76302	1.09865	1.26193	0.0424063
RHOG	1.32339	1.64272	1.24776	0.0426561
AGTPBP1	0.205235	0.44288	1.17907	0.0427117
CD1B	0.89555	0.486151	-1.32813	0.0429506
CXCL8	0.0182462	0.232248	1.1599	0.0431624
UQCRH	3.22439	2.94923	-1.21013	0.0434166
UBXN4	1.99439	1.66998	-1.25215	0.0438712
HBB	0.0256382	0.516317	1.40511	0.0440918
TUBB	4.25719	3.71331	-1.45789	0.0443873
GADD45A	0.254286	0.532637	1.21281	0.0446593
TFEC	0.399517	0.71318	1.24286	0.0447044
NA	0.803278	1.14298	1.26549	0.0453808
NDUFB7	2.15621	1.84851	-1.23773	0.0456354
ABCB10	0.198046	0.421183	1.16727	0.0462128
EFHD2	1.21717	1.57565	1.28207	0.0471163
NA	1.28197	1.59473	1.24207	0.047176
NA	0.134045	0.335596	1.14993	0.0472794
BCL6	0.0941991	0.295045	1.14937	0.0474099
RPS15A	5.41214	5.15727	-1.19323	0.0477318
CD93	0.121834	0.336048	1.16007	0.0479515
RGL4	0.568494	0.956627	1.3087	0.0480744
SSR1	0.938033	1.2492	1.24071	0.0496577
PTP4A2	3.55782	3.17969	-1.29966	0.0498624

## Sheet: DE T-ALL LICs
SYMBOL	logFC	adj.P.Val
PPP1R14C	2.23734	0.0307873
DNAJB11	1.77065	0.0307873
AATF	1.60793	0.0307873
SNRPA1	1.62433	0.0307873
PSMC3IP	1.98265	0.0307873
CRELD2	1.78419	0.0307873
NUDC	1.38274	0.0307873
AKAP12	1.78944	0.0307873
NPM1	1.35361	0.0307873
HSD17B10	1.75739	0.0307873
HABP4	1.76063	0.0307873
CACYBP	1.60882	0.0307873
MRFAP1	1.50078	0.0307873
PARK7	1.58529	0.0307873
PDIA6	1.60159	0.0307873
GOLM1	1.68485	0.0307873
IFT57	1.69792	0.0307873
SERBP1	1.38452	0.0307873
IK	1.38209	0.0307873
C1orf115	1.83912	0.0307873
CASTOR2	1.59127	0.0307873
AIFM1	1.44336	0.0307873
RAN	1.37521	0.0307873
NEFM	1.66594	0.0307873
HCCS	1.88467	0.0307873
EBNA1BP2	1.32065	0.0307873
PDCD4	2.15465	0.0307873
CD63	1.28989	0.0307873
CMAS	2.03822	0.0307873
TCEAL4	1.41595	0.0307873
CUTC	1.72068	0.0307873
FBXO22	1.58279	0.0307873
HOMER3	1.60868	0.0307873
LDHB	1.24218	0.0307873
SLC25A4	1.89212	0.0307873
GTF3C6	1.36689	0.0307873
HOMER2	1.60505	0.0307873
CFDP1	1.42034	0.0307873
HTATSF1	1.43433	0.0307873
HNRNPA1	1.16392	0.0307873
MATR3	-5.63633	0.0307873
HARS1	1.78318	0.0307873
DCTN1	1.59138	0.0307873
PRMT2	1.59476	0.0307873
MRPL51	1.12741	0.0307873
CCHCR1	1.44933	0.0307873
TIMM21	2.00853	0.0307873
PSMC5	1.38323	0.0307873
SLC18B1	2.16793	0.0307873
CDC26	1.40787	0.0307873
ARPC5L	1.39514	0.0307873
HNRNPU	1.30549	0.0307873
SH3GL3	2.02064	0.0307873
TNNT1	1.46462	0.0307873
SART1	1.2841	0.0307873
CBX6	2.05469	0.0307873
DTNBP1	1.347	0.0307873
BRMS1	1.32149	0.0307873
MIR600HG	2.16489	0.0307873
TNIP2	1.55733	0.0307873
MRFAP1L1	1.69256	0.0307873
RRP1	1.41293	0.0307873
PRDX5	1.23756	0.0307873
RTCB	1.45176	0.0307873
BEX4	1.71175	0.0307873
SSBP1	1.38947	0.0307873
SEC11C	1.51474	0.0307873
GET1	1.85839	0.0307873
SAFB	1.29955	0.0307873
CDV3	1.29854	0.0307873
RPS6	0.938382	0.0307873
RRBP1	1.36109	0.0307873
ACTB	-1.04381	0.0307873
PSMD4	1.26182	0.0307873
PSMD7	1.24743	0.0307873
EXOSC7	1.45166	0.0307873
COX4I1	0.990679	0.0307873
THOC3	1.52243	0.0307873
RBM34	1.44081	0.0307873
FAM50A	1.32935	0.0307873
PSMA7	1.12537	0.0307873
NADK2	1.76472	0.0307873
RCN2	1.69555	0.0307873
SYAP1	1.32133	0.0307873
HNRNPM	1.40115	0.0307873
CWC27	1.4032	0.0307873
NGRN	1.32978	0.0307873
LDHA	1.5153	0.0307873
GCSH	1.55087	0.0307873
USP22	1.22998	0.0307873
NA	1.71587	0.0307873
PDCL3	1.40967	0.0307873
VASH1-AS1	1.70218	0.0307873
CCT6A	1.57852	0.0307873
C1orf35	1.16146	0.0307873
TMED9	1.26313	0.0307873
EIF4B	1.33728	0.0307873
SNRPE	1.30987	0.0307873
ST13	1.18422	0.0307873
KLC3	1.65313	0.0307873
BAG1	1.32046	0.0307873
EIF3B	1.22979	0.0307873
CEP131	1.37686	0.0307873
BCAP31	1.08617	0.0307873
TPM3	1.34641	0.0307873
CNPY2	1.25731	0.0307873
RAB4A	1.57809	0.0307873
RTF2	1.26543	0.0307873
STUB1	1.4147	0.0307873
RAB40B	1.62737	0.0307873
HAUS7	1.34639	0.0307873
C2orf74	1.60485	0.0307873
LOC100288637	3.20921	0.0307873
OTUD3	1.58807	0.0307873
UBXN1	1.05244	0.0307873
RMDN3	1.75832	0.0307873
TCP1	1.42831	0.0307873
MED10	1.40867	0.0307873
TSPAN6	1.85708	0.0307873
PET117	1.41149	0.0307873
EI24	1.2397	0.0307873
PTS	1.82621	0.0307873
ATP5F1A	1.22591	0.0307873
LCP1	-1.12745	0.0307873
PAF1	1.35698	0.0307873
SEC11A	1.28409	0.0307873
GGNBP2	1.43653	0.0307873
RPS19BP1	1.06623	0.0307873
MFAP1	1.29746	0.0307873
HNRNPD	1.22695	0.0307873
UCK1	1.39612	0.0307873
RCHY1	1.93778	0.0307873
C11orf58	1.2347	0.0307873
KHK	1.44878	0.0307873
TIPRL	1.40097	0.0307873
MYL6	0.926175	0.0307873
FAM168B	1.78804	0.0307873
RBM8A	1.03013	0.0307873
GGCT	1.43304	0.0307873
METTL5	1.50281	0.0307873
CSRP2	1.94088	0.0307873
NEIL2	1.68211	0.0307873
FUNDC1	1.4365	0.0307873
KRI1	1.21139	0.0307873
IRAK1	1.33253	0.0307873
DLG3	1.56728	0.0307873
JAKMIP1	1.91829	0.0307873
UBA5	1.3505	0.0307873
PLAAT1	1.67164	0.0307873
DPCD	1.34648	0.0307873
TRIP10	1.44701	0.0307873
LSM4	1.07266	0.0307873
ETFB	1.18607	0.0307873
RPS15A	1.41648	0.0307873
STRAP	1.51969	0.0307873
DYNC1LI2	1.53128	0.0307873
EIF3A	1.26419	0.0307873
P4HA2	1.91728	0.0307873
SRSF3	1.11805	0.0307873
NDUFC2	1.11919	0.0307873
TRAF3IP1	1.38134	0.0307873
XPA	1.3169	0.0307873
CYP4F26P	1.86686	0.0307873
WDR83	1.37869	0.0307873
ANKRD18B	1.61936	0.0307873
MKRN1	1.31847	0.0307873
SH3BGRL3	-1.34844	0.0307873
BRMS1L	2.03498	0.0307873
BEX2	1.21659	0.0307873
ARRDC4	1.97886	0.0314302
MTCH1	1.34106	0.0317511
RNASEH1	1.33178	0.0317511
CALD1	1.78081	0.0317511
NEDD8	1.25242	0.0317511
MAD1L1	1.24089	0.0317511
MORF4L2	1.35771	0.0317511
SNRPD1	1.05139	0.0317511
ASB1	1.65654	0.0317511
KATNA1	1.43098	0.0317511
VASH1	1.70107	0.0317511
NEFL	1.70354	0.0317511
HNRNPH3	1.47725	0.0317511
UTP18	1.49907	0.0317511
SOD1	1.09664	0.0317511
CTSL	1.69015	0.0317511
SGCB	1.66744	0.0317511
UBE2V2	1.40458	0.031803
DDRGK1	1.10168	0.031803
LRPAP1	1.14983	0.031803
PITPNA	1.2663	0.031803
HIP1R	1.7365	0.031803
MRM3	1.26799	0.031803
PGM3	1.73254	0.031803
PIN4	1.15022	0.031803
CBY1	1.26679	0.031803
SRSF4	1.15884	0.031803
TPM1	1.5032	0.031803
PACSIN3	1.56912	0.031803
PPP1R12C	1.34388	0.031803
CANX	1.22277	0.031815
CDC37	1.20754	0.031815
CCDC43	1.44326	0.031815
HDAC8	1.40691	0.031815
PJA1	1.4427	0.031815
FRA10AC1	1.52123	0.031815
MPHOSPH6	1.42387	0.031815
UNC119B	1.66773	0.031815
LRRC45	1.29213	0.031815
YWHAE	1.20388	0.0322429
PALM3	1.36626	0.0322429
NDUFAB1	1.21087	0.0322429
MRPS9	1.47423	0.0322825
SAFB2	1.15038	0.0325168
LMNB2	1.08517	0.0325168
PSMB1	1.18577	0.032754
TIMM44	1.25037	0.032754
LPAR5	-2.0753	0.032754
CCDC28A	1.24455	0.032754
PINK1	1.41444	0.032754
C22orf46	1.36847	0.032754
BLOC1S2	1.45193	0.032754
NACA	0.929954	0.032754
FAIM	1.79024	0.032754
MIR223HG	-1.79918	0.032754
PPM1G	1.07686	0.032754
RABGGTB	1.27185	0.032754
UBTD2	1.39825	0.0330118
CTSV	1.82655	0.0330118
GYG2	1.51475	0.0331679
HDAC2	1.43317	0.0331679
RPS10-NUDT3	1.29277	0.0331679
DCUN1D5	1.49169	0.0332357
NDUFAF8	1.04825	0.033529
ENPP1	1.97345	0.033529
RBM17	1.02981	0.033529
MAGEA3	2.37158	0.033529
RRP15	1.42046	0.033529
GRPEL1	1.20651	0.033529
GALNT11	1.58378	0.033529
SMS	1.45163	0.033529
UQCRFS1	1.06164	0.033529
SNX7	1.74546	0.0336266
EZR	1.10398	0.0336266
GALNT13	1.98532	0.0340698
PRXL2A	1.20522	0.0340698
ZNF622	1.22029	0.0340698
TNKS1BP1	1.55597	0.0340698
NPM1P27	1.34432	0.0340698
ALKBH2	1.45654	0.0340698
HIRIP3	1.28463	0.0340698
FEZ1	1.91371	0.0340698
RFC4	1.32289	0.0341314
CETN2	1.25049	0.0341314
NFE2	-1.20762	0.0341314
SESTD1	1.62603	0.0341314
ADD2	1.69817	0.0344657
CORO1A	-1.11215	0.0344657
GNA11	1.37917	0.0346441
STRBP	1.22623	0.0350382
HNRNPAB	1.20051	0.0350382
PRSS12	1.80939	0.0350382
NGDN	1.19124	0.0350382
GMPPB	1.22824	0.0350382
PRC1	1.40918	0.0350382
GLRX5	1.23219	0.0350382
ISY1	1.15397	0.0350382
DUS1L	1.35179	0.0350382
TPD52L1	1.57719	0.0350382
SPN	-1.47457	0.0350382
PDE9A	1.53382	0.0350382
MRPL18	1.3955	0.0350382
PSMC6	1.38993	0.0350382
CSDE1	1.14154	0.0353925
TOP1MT	1.06006	0.0353925
SARNP	1.04832	0.0353925
ARPC1A	1.12624	0.0353925
DUSP12	1.28969	0.0353925
MRPS5	1.20561	0.0353925
CBWD5	1.24145	0.0353925
FIP1L1	1.2916	0.0353925
OPTN	1.35975	0.0353925
MRPL46	1.13832	0.0353925
RBFOX2	1.47007	0.0353925
SARS1	0.970907	0.0353925
PSMC2	1.16543	0.0353925
DRG1	1.21064	0.0353925
C9orf64	1.58017	0.0353925
TSR2	1.28617	0.0353925
CHMP6	1.15294	0.0353925
PSMD14	1.40602	0.0353925
CEP250	1.23052	0.0353925
PMVK	1.12083	0.0353925
DNAJA1	1.11406	0.0353925
MALSU1	1.13572	0.0353925
AAMDC	1.11122	0.0353925
SULT4A1	1.89221	0.0353925
RPS3	0.884441	0.0354505
ASRGL1	1.05812	0.0354505
SPAG16	1.58836	0.0354505
SERPINB1	-1.21092	0.035488
ANP32E	1.2752	0.0355368
PARD3	1.17436	0.0355368
CENPS	1.30404	0.0355368
RNF165	1.91551	0.0355368
MYH14	1.24152	0.0355368
GLOD4	1.28175	0.0355368
DLG5	1.77296	0.0355368
HSPA14	1.50509	0.0355368
SPTBN4	1.56484	0.0355368
HSPD1	1.36298	0.035768
FLOT2	1.40783	0.035768
LYZ	-1.33293	0.035768
CBWD3	1.27284	0.035768
SNF8	1.1992	0.035768
PPP2CA	1.08148	0.035768
SYF2	1.10075	0.035768
POLR2F	0.964474	0.035768
CLTA	1.02036	0.035768
KLHL2	2.01422	0.035768
ZC3H15	1.23923	0.035768
GLRX2	1.35734	0.035768
GPATCH4	1.19297	0.035768
SRSF9	1.15269	0.035768
CHAF1A	1.27866	0.035768
MLF1	1.64954	0.035768
EIF4ENIF1	1.41449	0.035768
STX10	1.14656	0.035768
EIF5B	0.988815	0.0358117
G0S2	1.30618	0.0358121
HNRNPH1	1.74227	0.0360947
PA2G4	1.18174	0.0360947
GPX3	1.98212	0.0360947
TUBB2B	1.35079	0.0360947
MPRIP	1.13455	0.0360947
PSMB6	0.981152	0.0360947
ATP6V1D	1.27895	0.0360947
REXO4	1.15996	0.0360947
CBS	1.24796	0.0360947
ENAH	1.5497	0.0360947
RALBP1	1.06212	0.0360947
MRPS26	1.17548	0.0360947
NDUFA5	1.20447	0.0360947
FADS2	-1.49617	0.0360947
TMEM183A	1.09164	0.0360947
SET	1.52516	0.0360947
TRMU	1.17102	0.0360947
DDIT4	1.21652	0.0360947
EEF1B2	1.06362	0.0360947
HSP90B1	1.04209	0.0360947
BCL2L2	1.57187	0.0360947
IL9R	-1.56469	0.0360947
IL9R	-1.56469	0.0360947
DHCR24	-1.03825	0.0361871
ALDH7A1	1.35706	0.0361871
SLU7	1.16624	0.0361871
ODAD4	2.18815	0.0361871
NA	1.47622	0.0361871
NAP1L1	1.02243	0.0361871
PIAS2	1.3582	0.0361871
DNAJA2	1.35356	0.0361871
NANS	1.17901	0.0361871
CWC15	1.06893	0.0361871
SEM1	0.955521	0.0364265
TFPT	1.04994	0.0364265
ITGB2	-1.34222	0.0366178
PHF10	1.34659	0.0366178
PSMC3	1.13809	0.0366178
RPL3	0.795878	0.0366178
MYB	-1.33511	0.0367384
FOXD3-AS1	1.34079	0.0367384
POLE4	1.04362	0.0367384
EMC4	1.09079	0.036744
CHCHD7	1.11505	0.0368209
CLEC11A	-1.34088	0.0368209
CCT7	1.03445	0.0368209
CLPTM1L	1.01744	0.0368209
UACA	1.35501	0.0371514
SH3BP5	1.31371	0.0371514
DPP7	-1.20657	0.0372156
RBSN	1.44493	0.0372156
RARS1	1.51807	0.0372156
ZNF778	1.82537	0.0372156
FBXO45	1.20564	0.0372156
CHMP2A	0.963149	0.0372156
TACO1	1.28973	0.0372156
LAMB1	1.741	0.0372156
RNF20	1.26852	0.0372156
EIF2S2	1.05608	0.0372156
NFKBIL1	1.06672	0.0372156
MRPL20	0.999697	0.0372156
QDPR	1.1816	0.0373613
MAOA	2.21575	0.0373613
AK6	1.32631	0.0373613
PFDN5	0.877817	0.0373613
EID2	1.60499	0.0373613
PNN	1.04254	0.0373613
ELMO1	-1.29372	0.0374696
HSPA4	1.12396	0.0374696
RRN3	-1.33848	0.0374696
SNRNP70	1.19757	0.0374696
ANAPC15	1.13315	0.0374696
ATAD3B	1.21127	0.0374696
CYB5R3	-1.25491	0.0374696
FXYD6	1.81793	0.0374696
RPL5	0.953509	0.0374696
VTI1B	1.13316	0.0374696
PARP14	-1.65547	0.0374696
PCNT	1.12321	0.0374696
CBWD2	1.16659	0.0374696
ANP32B	1.00478	0.0374696
PSMC1	1.08541	0.0374696
RPL36AL	0.904072	0.0374696
CD74	-1.3406	0.0374696
HRK	1.18156	0.0374696
OBSCN	1.5125	0.0374696
CIRBP	0.945258	0.0374696
H2AZ2	0.990075	0.0374721
SLC25A13	1.56058	0.0375713
MAPRE1	1.12894	0.0375713
NCL	1.06742	0.0381807
EEF1D	0.80549	0.0386445
SLC25A14	1.55876	0.0386445
PTPN6	-1.2031	0.0386445
CD63-AS1	1.67607	0.03878
MAP7D2	1.57398	0.0388438
EMC7	1.0609	0.0389022
HSD17B4	1.20424	0.0389243
NDUFS2	1.04044	0.0390632
ARHGAP11A	1.57906	0.0390953
ARID3A	1.48496	0.0391135
NA	1.30537	0.0391825
HTATIP2	1.12124	0.039208
SERGEF	1.09431	0.0392587
DNPH1	0.891176	0.0393837
SURF6	1.02102	0.0394524
HMCES	1.01966	0.0394524
TRIM44	1.22032	0.0394524
TOMM5	1.1936	0.0394524
MAP2K3	-1.4092	0.0394524
SPNS3	-1.28933	0.0394524
ACTR3B	1.49188	0.0395127
PLEC	1.5247	0.0395127
SURF2	1.06025	0.0395127
PLEKHJ1	1.01862	0.0398778
RCAN1	1.45578	0.0398778
TIPIN	1.30087	0.0399663
TIMM10	1.22023	0.0399663
MAP4K4	1.15092	0.0399663
CFAP298-TCP10L	1.14485	0.0399663
RNF14	1.44104	0.0400443
RAI14	1.4803	0.0400443
PTPN7	-1.15639	0.0400443
SELENOS	1.02301	0.0400443
NTPCR	1.02638	0.0400443
NA	1.12641	0.0400443
EIF2S1	1.21164	0.0400443
MAPKAP1	1.00875	0.0400443
CCDC137	1.23305	0.0400443
FAM177A1	1.16552	0.0400443
NDUFS6	0.88792	0.0400443
PSMD12	1.46763	0.0401013
DDX46	0.947941	0.0402442
LAPTM5	-1.34389	0.0402865
ZGPAT	1.14154	0.0404347
MTCH2	1.14852	0.0407041
CTTN	1.70791	0.0407041
NA	2.32639	0.0407041
DNAJC18	1.31991	0.0409546
PRAME	1.63664	0.04102
CHMP3	1.12216	0.04102
GRIPAP1	0.996127	0.0411835
HYPK	-2.09867	0.0411835
LAGE3	1.12093	0.0412541
TCIRG1	-1.51428	0.0412541
GSPT1	1.07136	0.0412541
UBA7	-1.55122	0.0412541
PSMD2	0.957513	0.0412541
ACSS3	2.51767	0.0412541
KCNQ2	1.95934	0.0412541
RAB13	1.18758	0.0412541
GET1-SH3BGR	2.03909	0.0412541
CCDC102A	1.34315	0.0412541
HCLS1	-1.09083	0.0412541
FAM162A	1.00308	0.0412541
NRDC	1.00757	0.0412541
EIF4H	1.10204	0.0413653
AGAP1	2.64017	0.0415289
SEPTIN4	1.99236	0.041627
NDUFB8	0.986715	0.041627
CRELD1	1.28788	0.041627
NA	1.48229	0.041627
KCNJ12	1.64134	0.041627
EMC6	0.978171	0.041627
CD82	-1.11408	0.041627
RPL7	0.752786	0.041627
BUD23	1.07852	0.041627
CHCHD6	1.06935	0.041627
KIF7	1.08958	0.041627
LONP1	1.0002	0.041627
PDHA1	1.17585	0.041627
REEP6	1.38729	0.041627
SLC40A1	-1.15437	0.041627
CREB3	1.12257	0.041627
GTF2E2	1.10016	0.041627
HNRNPC	0.911132	0.041627
PLAAT3	1.35273	0.041627
UTP6	1.03957	0.041627
TAPBP	-1.23063	0.0417441
TXNL4A	1.03922	0.0417441
SPRYD7	1.64702	0.0417441
ATP5IF1	0.866317	0.0417441
RHBDL3	1.40287	0.0417441
CFL1	-0.879826	0.0417441
UPF3B	1.06941	0.0417441
NDEL1	1.06875	0.0417441
LOC102724560	1.3022	0.0417441
RAD51C	1.23479	0.0420523
UQCRB	0.875788	0.0420523
NAT9	1.01095	0.0420523
CHD4	0.966538	0.0420523
IMPACT	1.49134	0.0420523
CHTF8	-1.21061	0.0420523
METAP2	1.23842	0.0420523
PCOLCE2	1.75047	0.0420523
RAB24	1.0808	0.0421389
ARHGEF37	2.09981	0.0421758
ALG5	1.1909	0.0423036
ADAM9	2.02633	0.042362
PMEPA1	1.73904	0.042362
GUK1	0.814668	0.0424132
RNF141	1.3651	0.042519
NUDT16	1.28152	0.0425416
UQCRH	0.900305	0.042581
STING1	-1.25861	0.042581
DOCK2	-1.14743	0.042581
SRSF12	1.34252	0.042581
BIN1	1.07809	0.042581
C7orf50	1.01521	0.042581
SYNM	1.79352	0.0426774
GPAT4	1.17338	0.0427572
LUC7L3	0.895489	0.0427572
CERS1	1.11591	0.042883
MAD2L2	0.912642	0.0429531
MOB3A	-1.2225	0.0431415
APTX	1.19649	0.0433154
COPS6	1.01685	0.043538
ATPSCKMT	1.52261	0.0435564
TUSC3	1.56268	0.0436577
TRAPPC2L	0.965818	0.0436577
VOPP1	1.05621	0.0438574
PITPNB	1.18965	0.0438574
NA	1.54522	0.0440269
POLR3D	1.12059	0.0440269
LONRF2	1.76106	0.0440869
CBWD1	1.26519	0.0440869
CLN8	1.43892	0.0440869
PSEN2	1.61875	0.0440869
CFAP298	1.07352	0.0442654
SPRTN	1.2578	0.0443766
ODC1	1.32659	0.0444319
RALB	1.46111	0.0445729
RND2	1.26363	0.0445729
UNC13D	-1.25246	0.0445729
DYNC2I1	1.12062	0.0445729
DOHH	1.12077	0.0445897
RNH1	-1.14599	0.0448811
PFN2	1.64842	0.0448811
COA6	1.33257	0.0451642
PPA1	1.26355	0.045712
CBX3	0.849431	0.045712
ARMCX3	1.36081	0.045712
CALM3	0.867142	0.045712
BLVRA	1.05958	0.0458491
BIN2	-1.05017	0.0458491
PRKRIP1	1.02199	0.0458869
CDRT4	1.22862	0.0460612
TMEM208	1.04504	0.0461133
NDUFS3	0.918762	0.0461133
NDUFA8	0.998102	0.0461133
EIF3M	1.02799	0.0461133
CTSC	-1.07133	0.0461133
FXR1	1.13592	0.0461133
BORCS6	1.0644	0.0461133
HMGB3	1.15103	0.0461133
IBA57	1.1283	0.0461133
SPAG9	1.48973	0.0461133
FUCA1	-1.48523	0.0461133
ANKS6	1.08108	0.0461133
LUC7L2	1.16266	0.04619
COQ5	1.14066	0.0462675
YKT6	1.17535	0.0462675
CGN	1.36476	0.0462841
NOM1	1.18156	0.0463845
TOMM20	1.14204	0.0463915
SUPT6H	1.16546	0.0464295
EZH2	1.16209	0.0464295
HMGCR	-1.23997	0.0464295
ATG101	1.22277	0.0464295
ARHGAP1	-1.2205	0.046434
TPPP3	1.4498	0.046434
GEMIN4	-1.38612	0.046434
EIF2B3	1.01027	0.046434
ZRSR2P1	4.44525	0.046434
SIKE1	0.937392	0.046434
UCHL3	1.0717	0.046451
TRIR	1.00714	0.046451
SNRNP35	1.0275	0.046479
NSG1	1.70278	0.0465466
CLNS1A	1.16515	0.0465466
RBM25	0.95783	0.0465466
STMND1	1.96332	0.0465466
USP18	1.45703	0.0472128
SNX4	1.11443	0.0472128
STAT5A	-1.12545	0.0472128
PRPF38B	1.16254	0.0472251
EEF1A1	0.628792	0.0472484
EPS8L1	1.36408	0.0472484
ECHDC1	1.09904	0.0472484
HSP90AA1	0.889924	0.0472484
PSMD10	1.1514	0.0472484
LRP6	1.52086	0.0472484
SNRNP25	0.913749	0.0472484
HNRNPA3	1.05803	0.0472484
DHX16	1.0242	0.0472484
LAMC1	1.2265	0.0472484
WDR4	1.07442	0.0472484
NA	1.61607	0.0472484
PPIC	1.54542	0.0472853
EMC9	1.08127	0.0472853
WHAMM	1.2988	0.0474364
IL16	-1.43873	0.0474607
TUSC2	0.932521	0.0475446
NDUFB6	0.994336	0.04797
GSDME	1.69548	0.0480202
FKBP9	1.87623	0.0480202
FADS1	-1.01202	0.0480202
RSU1	-1.07668	0.0480202
DAPK3	1.42501	0.0480202
RSPH3	1.59259	0.0480206
RPS4Y1	-1.43348	0.0480206
BOP1	0.9768	0.048122
PPP2CB	1.32204	0.0482931
SMARCE1	0.873995	0.0484125
GTPBP4	1.2355	0.0484191
SAE1	0.992229	0.0484191
DHX38	0.997086	0.0484191
CGNL1	2.01289	0.0484191
PARL	1.05497	0.0485288
TRAK2	1.439	0.0485944
EXOSC3	1.03776	0.0485944
TPST2	-1.18684	0.0485944
KCMF1	1.17562	0.0485944
GAS8	1.09479	0.0486658
EMC2	1.14913	0.0486658
FAM50B	1.2047	0.0493942
TNIK	1.52801	0.0496224
TIMM23	1.14233	0.0497866
TBCB	0.847503	0.0497866
LRP2	1.7648	0.0497866
MFNG	-1.14572	0.0499307
SKA2	1.10805	0.0499611
