# Supplementary material for: ADAR1 drives stemness of leukemia initiating cells in T-cell acute lymphoblastic leukemia via attenuating immunogenic dsRNA sensing
Source: Research Square preprint supplement (doi:10.21203/rs.3.rs-2444524/v1), 2023-01-17
Supplement: Supplementary file 4 [file af3e413bbdc551a49c6d0a5d.xlsx]

## Sheet: Sheet1
Sample ID	Diagnosis	Collection Timepoint	Sample Type	Age (years)	Karyotype at diagnosis	Experiments
MCG-054	T-Lymphoblastic Lymphoma	Diagnostic	Pleural Fluid	4		PDX, ATO
MCG-065	T-Lymphoblastic Lymphoma	Diagnostic	Bone Marrow	8	46,XY,inv(7)(p15q34)[13]/46,XY[7]	RNA-seq
MCG-070	T-Lymphoblastic Lymphoma	Diagnostic	Bone Marrow	13	46,XY[20]	RNA-seq, PDX, ATO
MCG_076	T-Lymphoblastic Lymphoma	Diagnostic	Blood	17	46,XY,add(9)(p13),t(11;14)(p13;q11.2)[11]/46,XY[9]	RNA-seq (Regulated and ATO), PDX, ATO
MCG_081	T-Lymphoblastic Lymphoma	Diagnostic	Blood	18 month	t(5;14)	RNA-seq (ATO), PDX, ATO
