# Supplementary material for: ADAR1 drives stemness of leukemia initiating cells in T-cell acute lymphoblastic leukemia via attenuating immunogenic dsRNA sensing
Source: Research Square preprint supplement (doi:10.21203/rs.3.rs-2444524/v1), 2023-01-17
Supplement: Supplementary file 5 [file ed20568a02e563ea5a65171e.xlsx]

## Sheet: ATO
	Name	Phenotype	Tissue
	Thy1	mCD29- CD14- CD56- CD19- CD34+ CD7- CD1a-	Cord Blood ATO
	Thy2	mCD29- CD14- CD56- CD19- CD34+ CD7+ CD1a-	Cord Blood ATO
	Thy3	mCD29- CD14- CD56- CD19- CD34+ CD7+ CD1a+	Cord Blood ATO
	Thy4	mCD29- CD14- CD56- CD19- CD34- CD8+ CD4+ CD3-	Cord Blood ATO
	Thy5	mCD29- CD14- CD56- CD19- CD34- CD8- CD4+ CD3+	Cord Blood ATO
	Thy6	mCD29- CD14- CD56- CD19- CD34- CD8+ CD4- CD3+	Cord Blood ATO

## Sheet: LIC
	Name	Phenotype
	Lin-	CD8- CD56- CD4- CD3- CD19- CD2- CD14-
	Stem	hCD45+ Lin- CD34+ CD38-
	Progenitor	hCD45+ Lin- CD34+ CD38+
