# Supplementary material for: ADAR1 drives stemness of leukemia initiating cells in T-cell acute lymphoblastic leukemia via attenuating immunogenic dsRNA sensing
Source: Research Square preprint supplement (doi:10.21203/rs.3.rs-2444524/v1), 2023-01-17
Supplement: Supplementary file 6 [file f807919941ad0c792a4a506a.xlsx]

## Sheet: wt IFN vs wt
Symbol	Description	log2FoldChange	pvalue
FYN	FYN proto-oncogene_ Src family tyrosine kinase	-0.472188	8.81296e-05
PHGDH	phosphoglycerate dehydrogenase	-0.744373	8.33693e-05	total DE genes	30
PSAT1	phosphoserine aminotransferase 1	-0.856402	0.000288436	up regulated	6
MTHFD2	methylenetetrahydrofolate dehydrogenase (NADP+ dependent) 2_ methenyltetrahydrofolate cyclohydrolase	-0.776302	0.000699491	downregulated	24
GARS	glycyl-tRNA synthetase	-0.473403	0.00209036
IKZF2	IKAROS family zinc finger 2 (Helios)	-0.494999	0.00284678
DECR1	2_4-dienoyl CoA reductase 1_ mitochondrial	-0.542621	0.0044953
GRPEL1	GrpE-like 1_ mitochondrial (E. coli)	0.720314	0.00453143
CD247	CD247 molecule	-0.712718	0.0217688
CD6	CD6 molecule	0.521172	0.0234651
CD96	CD96 molecule	-0.524727	0.0183388
GRK2	adrenergic_ beta_ receptor kinase 1	-0.387993	0.017458
HSPA9	heat shock 70kDa protein 9 (mortalin)	-0.351117	0.0234651
IFNAR1	interferon (alpha_ beta and omega) receptor 1	-0.377355	0.0189796
LEF1	lymphoid enhancer-binding factor 1	-0.323826	0.0170418
NCAPH	non-SMC condensin I complex_ subunit H	-0.35707	0.0253106
NSD2	Wolf-Hirschhorn syndrome candidate 1	-0.515246	0.0260472
OAS1	2'-5'-oligoadenylate synthetase 1_ 40/46kDa	3.70941	0.0159487
SHMT2	serine hydroxymethyltransferase 2 (mitochondrial)	-0.35709	0.0280803
BID	BH3 interacting domain death agonist	0.368413	0.0322174
GNAI2	guanine nucleotide binding protein (G protein)_ alpha inhibiting activity polypeptide 2	-0.412009	0.0400886
HIF1A	hypoxia inducible factor 1_ alpha subunit (basic helix-loop-helix transcription factor)	-0.31269	0.0384201
LAMP1	lysosomal-associated membrane protein 1	0.311651	0.0390506
MAP3K7	mitogen-activated protein kinase kinase kinase 7	-0.345792	0.038607
NDUFA2	NADH dehydrogenase (ubiquinone) 1 alpha subcomplex_ 2_ 8kDa	-0.549062	0.0389555
STAT3	signal transducer and activator of transcription 3 (acute-phase response factor)	-0.378279	0.0374467
VAV3	vav 3 guanine nucleotide exchange factor	-0.222058	0.0365473
ADD1	adducin 1 (alpha)	-0.361888	0.0463209
PECAM1	platelet/endothelial cell adhesion molecule 1	-0.339057	0.0489782
TRAC	T cell receptor alpha constant	0.380272	0.048266
BUB1	BUB1 mitotic checkpoint serine/threonine kinase	-0.27253	0.0515894
OAS3	2'-5'-oligoadenylate synthetase 3_ 100kDa	1.4881	0.0529049
CD28	CD28 molecule	-0.580682	0.0626976
CTSD	cathepsin D	0.346744	0.0605365
IFIT1	interferon-induced protein with tetratricopeptide repeats 1	2.37851	0.0664471
LAT	linker for activation of T cells	-0.300669	0.0602332
OAS2	2'-5'-oligoadenylate synthetase 2_ 69/71kDa	1.94503	0.0559709
PDHA1	pyruvate dehydrogenase (lipoamide) alpha 1	-0.52302	0.060708
TRBC1/2	NA	0.29547	0.0648052
TRIM25	tripartite motif containing 25	0.653872	0.063702
RORA	RAR-related orphan receptor A	-0.545046	0.0706151
LAMTOR1	late endosomal/lysosomal adaptor_ MAPK and MTOR activator 1	-0.348847	0.0728056
NCAPD2	non-SMC condensin I complex_ subunit D2	-0.277197	0.0768981
NFKB2	nuclear factor of kappa light polypeptide gene enhancer in B-cells 2 (p49/p100)	-0.606336	0.0779759
NKG7	natural killer cell granule protein 7	0.655352	0.0789367
AURKA	aurora kinase A	-0.615894	0.0854354
CBR4	carbonyl reductase 4	-0.483985	0.0874991
LAIR1	leukocyte-associated immunoglobulin-like receptor 1	0.347923	0.0882118
MTHFD1	methylenetetrahydrofolate dehydrogenase (NADP+ dependent) 1_ methenyltetrahydrofolate cyclohydrolase_ formyltetrahydrofolate synthetase	0.211957	0.0882011
PIK3R1	phosphoinositide-3-kinase_ regulatory subunit 1 (alpha)	-0.343145	0.0816797
ALDOC	aldolase C_ fructose-bisphosphate	-0.568284	0.0923516
MX1	MX dynamin-like GTPase 1	5.04792	0.092883
GOT1	glutamic-oxaloacetic transaminase 1_ soluble	-0.436099	0.0954765
SIK1	salt-inducible kinase 1	1.67807	0.10004
IRF7	interferon regulatory factor 7	2.27302	0.110905
MID1IP1	MID1 interacting protein 1	0.229689	0.108337
RAG2	recombination activating gene 2	-0.421016	0.111939
DAP3	death associated protein 3	-0.212236	0.127324
IFI6	interferon_ alpha-inducible protein 6	1.40871	0.123638
IL23A	interleukin 23_ alpha subunit p19	1.22166	0.126532
LCK	LCK proto-oncogene_ Src family tyrosine kinase	0.195135	0.128408
OPA1	optic atrophy 1 (autosomal dominant)	-0.200223	0.127724
TCF7	transcription factor 7 (T-cell specific_ HMG-box)	-0.463965	0.12003
TPR	translocated promoter region_ nuclear basket protein	-0.446256	0.12759
AKT2	v-akt murine thymoma viral oncogene homolog 2	0.208665	0.132118
ZBTB16	zinc finger and BTB domain containing 16	-1.21703	0.136751
IRF9	interferon regulatory factor 9	1.94111	0.13902
CXCR4	chemokine (C-X-C motif) receptor 4	-0.258988	0.147371
PTPRC	protein tyrosine phosphatase_ receptor type_ C	-0.20704	0.150867
WDR45	WD repeat domain 45	-0.456858	0.155019
ATG14	autophagy related 14	0.431716	0.225959
ATG7	autophagy related 7	-0.278479	0.199734
CD38	CD38 molecule	-0.591037	0.202377
CD45R0	NA	-0.264213	0.232507
CD69	CD69 molecule	-0.770913	0.224372
CHMP3	charged multivesicular body protein 3	0.243295	0.173545
COX16	COX16 cytochrome c oxidase assembly homolog	-0.281145	0.159733
COX5B	cytochrome c oxidase subunit Vb	-0.302785	0.219606
CPT1A	carnitine palmitoyltransferase 1A (liver)	-0.51625	0.22142
DIABLO	diablo_ IAP-binding mitochondrial protein	-0.301033	0.164104
DOCK2	dedicator of cytokinesis 2	-0.0974894	0.232805
ERAP2	endoplasmic reticulum aminopeptidase 2	-0.288304	0.201741
IFIT2	interferon-induced protein with tetratricopeptide repeats 2	0.769387	0.203658
IFIT3	interferon-induced protein with tetratricopeptide repeats 3	2.63969	0.246753
IL32	interleukin 32	-0.215628	0.223105
IRF3	interferon regulatory factor 3	0.777608	0.177654
ISG15	ISG15 ubiquitin-like modifier	1.02277	0.247198
MAP2K2	mitogen-activated protein kinase kinase 2	0.192256	0.238138
MT2A	metallothionein 2A	0.26049	0.242759
NDUFA1	NADH dehydrogenase (ubiquinone) 1 alpha subcomplex_ 1_ 7.5kDa	-0.458118	0.188097
NDUFA6	NADH dehydrogenase (ubiquinone) 1 alpha subcomplex_ 6_ 14kDa	0.260772	0.204238
NDUFB9	NADH dehydrogenase (ubiquinone) 1 beta subcomplex_ 9_ 22kDa	0.219748	0.236445
NMT1	N-myristoyltransferase 1	-0.201243	0.161875
NOTCH1	notch 1	-0.247928	0.238991
NPRL3	NPR3-like_ GATOR1 complex subunit	-0.417196	0.206935
PDK1	pyruvate dehydrogenase kinase_ isozyme 1	-0.303653	0.2161
PFKP	phosphofructokinase_ platelet	-0.16339	0.246713
RAE1	ribonucleic acid export 1	0.142169	0.217565
SERINC3	serine incorporator 3	-0.186225	0.179831
SKP1	S-phase kinase-associated protein 1	-0.37105	0.212667
STAM	signal transducing adaptor molecule (SH3 domain and ITAM motif) 1	-0.570384	0.174887
STAT1	signal transducer and activator of transcription 1_ 91kDa	1.07571	0.189698
STAT2	signal transducer and activator of transcription 2_ 113kDa	-0.557218	0.200553
TFAM	transcription factor A_ mitochondrial	0.223989	0.18233
TGFB1	transforming growth factor_ beta 1	0.198691	0.219467
TGFBR1	transforming growth factor_ beta receptor 1	-0.27793	0.246132
TOX	thymocyte selection-associated high mobility group box	-0.181353	0.226488
UBE2F	ubiquitin-conjugating enzyme E2F (putative)	-0.281161	0.228831
UBE2I	ubiquitin-conjugating enzyme E2I	-0.221324	0.238722
UBE2V1	ubiquitin-conjugating enzyme E2 variant 1	-0.161016	0.243421
WAS	Wiskott-Aldrich syndrome	-0.33417	0.195098
COX7C	cytochrome c oxidase subunit VIIc	0.339486	0.252603
FAM30A	KIAA0125	-0.584963	0.266362
IFI35	interferon-induced protein 35	1.078	0.263331
TRAF3	TNF receptor-associated factor 3	0.193508	0.266988
PPP2R5D	protein phosphatase 2_ regulatory subunit B'_ delta	-0.175548	0.270565
TRGV3/5	NA	-0.463947	0.273571
OXSM	3-oxoacyl-ACP synthase_ mitochondrial	-0.288245	0.276261
IL10RA	interleukin 10 receptor_ alpha	-0.758992	0.279073
CREB1	cAMP responsive element binding protein 1	0.167196	0.287968
IL7R	interleukin 7 receptor	0.280108	0.291456
PSPH	phosphoserine phosphatase	-0.459432	0.292617
SOCS2	suppressor of cytokine signaling 2	-0.419301	0.285353
STK11	serine/threonine kinase 11	0.349942	0.288985
ACACA	acetyl-CoA carboxylase alpha	0.714598	0.340784
ACAD10	acyl-CoA dehydrogenase family_ member 10	0.36257	0.339998
ADAR	adenosine deaminase_ RNA-specific	0.459134	0.370358
ALDH3A2	aldehyde dehydrogenase 3 family_ member A2	-0.296509	0.341951
ATP6V1F	ATPase_ H+ transporting_ lysosomal 14kDa_ V1 subunit F	-0.294147	0.364853
CCNC	cyclin C	-0.132959	0.367882
CD3G	CD3g molecule_ gamma (CD3-TCR complex)	-0.199145	0.305011
CD45RA	NA	0.36995	0.352518
CD7	CD7 molecule	0.19977	0.365814
COX6B1	cytochrome c oxidase subunit VIb polypeptide 1 (ubiquitous)	-0.224377	0.323447
COX7B	cytochrome c oxidase subunit VIIb	-0.253459	0.366125
FNIP1	folliculin interacting protein 1	-0.314109	0.352164
HDAC7	histone deacetylase 7	-0.358454	0.365627
KLRG1	killer cell lectin-like receptor subfamily G_ member 1	0.70044	0.351269
MFN2	mitofusin 2	0.2144	0.342164
MTHFS	5_10-methenyltetrahydrofolate synthetase (5-formyltetrahydrofolate cyclo-ligase)	-0.161921	0.345395
NFIL3	nuclear factor_ interleukin 3 regulated	-0.130573	0.37133
NME2	NME/NM23 nucleoside diphosphate kinase 2	-0.237371	0.314244
RDH10	retinol dehydrogenase 10 (all-trans)	0.643856	0.360083
SERINC1	serine incorporator 1	-0.15029	0.323433
SLAMF6	SLAM family member 6	-0.443607	0.299161
SMARCA4	SWI/SNF related_ matrix associated_ actin dependent regulator of chromatin_ subfamily a_ member 4	-0.0858717	0.325102
SOS2	son of sevenless homolog 2 (Drosophila)	-0.61891	0.298414
TERT	telomerase reverse transcriptase	0.4975	0.363242
TGFBR2	transforming growth factor_ beta receptor II (70/80kDa)	-0.238348	0.367649
TGIF2	TGFB-induced factor homeobox 2	-0.456955	0.31244
TNFSF9	tumor necrosis factor (ligand) superfamily_ member 9	0.628031	0.358899
TRAV19	T cell receptor alpha variable 19	-0.418713	0.32192
TRBV7-2	T cell receptor beta variable 7-2	0.21494	0.316301
TRBV7-8	T cell receptor beta variable 7-8	0.62293	0.337033
UQCRQ	ubiquinol-cytochrome c reductase_ complex III subunit VII_ 9.5kDa	-0.199869	0.341085
VAV1	vav 1 guanine nucleotide exchange factor	-0.133678	0.335288
ZAP70	zeta-chain (TCR) associated protein kinase 70kDa	-0.097356	0.325894
PKM	pyruvate kinase_ muscle	0.0720627	0.377346
MKI67	marker of proliferation Ki-67	-0.13929	0.38271
ACADVL	acyl-CoA dehydrogenase_ very long chain	-0.27323	0.448948
ACOT2	acyl-CoA thioesterase 2	0	1
ACSF2	acyl-CoA synthetase family member 2	-0.263034	0.566001
ACSL5	acyl-CoA synthetase long-chain family member 5	0	1
ACTN1	actinin_ alpha 1	-0.16665	0.504009
ACVR1B	activin A receptor_ type IB	0.135655	0.797474
ACVR1C	activin A receptor_ type IC	0	1
ACVR2A	activin A receptor_ type IIA	0	1
ADAR1 P110 ISOFORM	NA	0	1
ADAR1 P150 ISOFORM	NA	0	1
ADAR2	adenosine deaminase_ RNA-specific_ B1	0	1
ADORA2A	adenosine A2a receptor	0.206451	0.828134
AFDN	acrofacial dysostosis 1_ Nager type	-1.16763e-16	1
AHR	aryl hydrocarbon receptor	0	1
AKT1	v-akt murine thymoma viral oncogene homolog 1	0.186769	0.689317
ALDH1L1	aldehyde dehydrogenase 1 family_ member L1	0	1
ALDH1L2	aldehyde dehydrogenase 1 family_ member L2	0	1
ALDH8A1	aldehyde dehydrogenase 8 family_ member A1	0	1
ALDOA	aldolase A_ fructose-bisphosphate	-0.0594751	0.667128
ANGPT2	angiopoietin 2	0	1
APC	adenomatous polyposis coli	-0.0671142	0.858632
APOBEC3B	apolipoprotein B mRNA editing enzyme_ catalytic polypeptide-like 3B	0	1
APOBEC3G	apolipoprotein B mRNA editing enzyme_ catalytic polypeptide-like 3G	0	1
ARAF	A-Raf proto-oncogene_ serine/threonine kinase	0.415037	0.560811
AREG	amphiregulin	0	1
ATP5MF	NA	-0.167181	0.730045
ATP5MG	NA	-0.0905309	0.783517
ATP5PD	NA	0.117161	0.463428
B3GAT1	beta-1_3-glucuronyltransferase 1	0	1
BATF	basic leucine zipper transcription factor_ ATF-like	0.432959	0.510401
BATF3	basic leucine zipper transcription factor_ ATF-like 3	0.00628626	0.985892
BCL2	B-cell CLL/lymphoma 2	-0.137504	0.800536
BCL2L1	BCL2-like 1	-0.197537	0.589246
BCL6	B-cell CLL/lymphoma 6	0.347923	0.778071
BLK	BLK proto-oncogene_ Src family tyrosine kinase	0.283793	0.498253
BTBD6	BTB (POZ) domain containing 6	-0.324002	0.434877
C3	complement component 3	0	1
CALM1	calmodulin 1 (phosphorylase kinase_ delta)	-0.0491875	0.866929
CARD10	caspase recruitment domain family_ member 10	0	1
CASP3	caspase 3_ apoptosis-related cysteine peptidase	-0.165059	0.48509
CASP8	caspase 8_ apoptosis-related cysteine peptidase	-0.00319534	0.991376
CCL1	chemokine (C-C motif) ligand 1	0	1
CCL11	chemokine (C-C motif) ligand 11	0	1
CCL13	chemokine (C-C motif) ligand 13	0	1
CCL14	chemokine (C-C motif) ligand 14	0	1
CCL15	chemokine (C-C motif) ligand 15	0	1
CCL16	chemokine (C-C motif) ligand 16	0	1
CCL17	chemokine (C-C motif) ligand 17	0	1
CCL18	chemokine (C-C motif) ligand 18 (pulmonary and activation-regulated)	0	1
CCL19	chemokine (C-C motif) ligand 19	0	1
CCL2	chemokine (C-C motif) ligand 2	0	1
CCL20	chemokine (C-C motif) ligand 20	0	1
CCL21	chemokine (C-C motif) ligand 21	0	1
CCL22	chemokine (C-C motif) ligand 22	0	1
CCL23	chemokine (C-C motif) ligand 23	0	1
CCL24	chemokine (C-C motif) ligand 24	0	1
CCL25	chemokine (C-C motif) ligand 25	0	1
CCL26	chemokine (C-C motif) ligand 26	0	1
CCL27	chemokine (C-C motif) ligand 27	0	1
CCL28	chemokine (C-C motif) ligand 28	0	1
CCL3/L1	NA	0	1
CCL4/L1	NA	0	1
CCL5	chemokine (C-C motif) ligand 5	0	1
CCL7	chemokine (C-C motif) ligand 7	0	1
CCL8	chemokine (C-C motif) ligand 8	0	1
CCR2	chemokine (C-C motif) receptor 2	0	1
CCR4	chemokine (C-C motif) receptor 4	0.302563	0.656186
CCR5	chemokine (C-C motif) receptor 5 (gene/pseudogene)	0	1
CCR6	chemokine (C-C motif) receptor 6	0	1
CCR7	chemokine (C-C motif) receptor 7	0	1
CCR8	chemokine (C-C motif) receptor 8	-0.0418202	0.927397
CD14	CD14 molecule	0	1
CD160	CD160 molecule	0	1
CD163	CD163 molecule	0	1
CD19	CD19 molecule	0	1
CD1A	CD1a molecule	-0.0260974	0.939082
CD1D	CD1d molecule	-0.280472	0.490445
CD200	CD200 molecule	0	1
CD209	CD209 molecule	0	1
CD22	CD22 molecule	0	1
CD244	CD244 molecule_ natural killer cell receptor 2B4	0	1
CD27	CD27 molecule	0	1
CD274	CD274 molecule	0	1
CD276	CD276 molecule	0	1
CD300C	CD300c molecule	0	1
CD300E	CD300e molecule	0	1
CD300LF	CD300 molecule-like family member f	0	1
CD33	CD33 molecule	0	1
CD3D	CD3d molecule_ delta (CD3-TCR complex)	0.00129312	0.995783
CD3E	CD3e molecule_ epsilon (CD3-TCR complex)	-0.0331669	0.807433
CD4	CD4 molecule	-0.108934	0.88298
CD40	CD40 molecule_ TNF receptor superfamily member 5	0	1
CD40LG	CD40 ligand	0.247483	0.670878
CD68	CD68 molecule	0	1
CD80	CD80 molecule	0	1
CD84	CD84 molecule	-0.124848	0.497846
CD86	CD86 molecule	0	1
CD8A	CD8a molecule	0	1
CD8B	CD8b molecule	0	1
CD9	CD9 molecule	0.0831701	0.912411
CD99	CD99 molecule	0.0222047	0.899891
CDC26	cell division cycle 26	0.00415164	0.983783
CDC42	cell division cycle 42	0.0277747	0.921807
CDKN1A	cyclin-dependent kinase inhibitor 1A (p21_ Cip1)	0.807355	0.509397
CEACAM1	carcinoembryonic antigen-related cell adhesion molecule 1 (biliary glycoprotein)	0	1
CEACAM3	carcinoembryonic antigen-related cell adhesion molecule 3	0	1
CHMP4A	charged multivesicular body protein 4A	0.12443	0.432688
CIITA	class II_ major histocompatibility complex_ transactivator	0	1
CISH	cytokine inducible SH2-containing protein	0	1
CKAP5	cytoskeleton associated protein 5	-0.200614	0.617327
CLCF1	cardiotrophin-like cytokine factor 1	0	1
CLDN1	claudin 1	0	1
CLDN23	claudin 23	0	1
CLDN3	claudin 3	0	1
CLDN4	claudin 4	0	1
CLDN7	claudin 7	0	1
CMIP	c-Maf inducing protein	0.0717907	0.910353
CMKLR1	chemerin chemokine-like receptor 1	0	1
COLEC12	collectin sub-family member 12	0	1
COX19	COX19 cytochrome c oxidase assembly factor	0.234465	0.465903
COX4I1	cytochrome c oxidase subunit IV isoform 1	-0.0490781	0.753839
COX6C	cytochrome c oxidase subunit VIc	0.00239964	0.993279
COX7A2	cytochrome c oxidase subunit VIIa polypeptide 2 (liver)	0.00312224	0.992179
CPA3	carboxypeptidase A3 (mast cell)	0	1
CPT1B	carnitine palmitoyltransferase 1B (muscle)	0.160465	0.819477
CRLF2	cytokine receptor-like factor 2	0	1
CS	citrate synthase	0.00339858	0.985549
CSF2	colony stimulating factor 2 (granulocyte-macrophage)	0	1
CSF2RA	colony stimulating factor 2 receptor_ alpha_ low-affinity (granulocyte-macrophage)	0	1
CSF3	colony stimulating factor 3 (granulocyte)	0	1
CSF3R	colony stimulating factor 3 receptor (granulocyte)	0	1
CTLA4	cytotoxic T-lymphocyte-associated protein 4	0	1
CTNNA1	catenin (cadherin-associated protein)_ alpha 1_ 102kDa	-0.0782312	0.791425
CTNNB1	catenin (cadherin-associated protein)_ beta 1_ 88kDa	-0.0857232	0.536343
CTNND1	catenin (cadherin-associated protein)_ delta 1	0	1
CTSS	cathepsin S	0	1
CTSW	cathepsin W	0.158698	0.740452
CX3CL1	chemokine (C-X3-C motif) ligand 1	0	1
CX3CR1	chemokine (C-X3-C motif) receptor 1	0.440573	0.589139
CXCL1	chemokine (C-X-C motif) ligand 1 (melanoma growth stimulating activity_ alpha)	0	1
CXCL10	chemokine (C-X-C motif) ligand 10	0	1
CXCL11	chemokine (C-X-C motif) ligand 11	0	1
CXCL12	chemokine (C-X-C motif) ligand 12	0	1
CXCL13	chemokine (C-X-C motif) ligand 13	0	1
CXCL14	chemokine (C-X-C motif) ligand 14	0	1
CXCL16	chemokine (C-X-C motif) ligand 16	0	1
CXCL2	chemokine (C-X-C motif) ligand 2	0	1
CXCL3	chemokine (C-X-C motif) ligand 3	-0.436099	0.442761
CXCL5	chemokine (C-X-C motif) ligand 5	0	1
CXCL6	chemokine (C-X-C motif) ligand 6	0	1
CXCL8	chemokine (C-X-C motif) ligand 8	0	1
CXCL9	chemokine (C-X-C motif) ligand 9	0	1
CXCR3	chemokine (C-X-C motif) receptor 3	-0.584963	0.534301
CXCR5	chemokine (C-X-C motif) receptor 5	0	1
CXCR6	chemokine (C-X-C motif) receptor 6	0	1
CYBB	cytochrome b-245_ beta polypeptide	0	1
DDIT4	DNA-damage-inducible transcript 4	0.073249	0.885072
DDX17	DEAD (Asp-Glu-Ala-Asp) box helicase 17	0	1
DDX5	DEAD (Asp-Glu-Ala-Asp) box helicase 5	0	1
DDX58 (RIG-I)	NA	0	1
DGLUCY	NA	0.181998	0.663027
DHFR2	NA	0.184425	0.796573
DHRS4	dehydrogenase/reductase (SDR family) member 4	0.0496021	0.797526
DHX9	DEAH (Asp-Glu-Ala-His) box helicase 9	0	1
DLL1	delta-like 1 (Drosophila)	0	1
DUSP1	dual specificity phosphatase 1	-0.125531	0.779891
DVL2	dishevelled segment polarity protein 2	-0.0632516	0.776916
EBI3	Epstein-Barr virus induced 3	0	1
EGF	epidermal growth factor	0	1
EGR1	early growth response 1	0	1
ENTPD1	ectonucleoside triphosphate diphosphohydrolase 1	0	1
ENTPD2	ectonucleoside triphosphate diphosphohydrolase 2	0	1
EOMES	eomesodermin	0	1
FAS	Fas cell surface death receptor	-0.0487963	0.803712
FASLG	Fas ligand (TNF superfamily_ member 6)	0	1
FASN	fatty acid synthase	0.13457	0.50308
FCAR	Fc fragment of IgA receptor	0	1
FCGR3A/B	NA	0	1
FCRL2	Fc receptor-like 2	0	1
FH	fumarate hydratase	-0.126722	0.606877
FKBP1A	FK506 binding protein 1A_ 12kDa	-0.0725829	0.958779
FLCN	folliculin	-0.222392	0.593266
FOS	FBJ murine osteosarcoma viral oncogene homolog	0	1
FOSB	FBJ murine osteosarcoma viral oncogene homolog B	0	1
FOXO1	forkhead box O1	0	1
FOXP3	forkhead box P3	0	1
FPR1	formyl peptide receptor 1	0	1
GADD45B	growth arrest and DNA-damage-inducible_ beta	-0.402098	0.741015
GART	phosphoribosylglycinamide formyltransferase_ phosphoribosylglycinamide synthetase_ phosphoribosylaminoimidazole synthetase	-0.164588	0.416333
GATA3	GATA binding protein 3	-0.0997269	0.648298
GFER	growth factor_ augmenter of liver regeneration	0.0196288	0.955773
GFM1	G elongation factor_ mitochondrial 1	0.115966	0.734529
GLI1	GLI family zinc finger 1	0	1
GLS	glutaminase	0.0482173	0.637431
GLS2	glutaminase 2 (liver_ mitochondrial)	0	1
GLUD1/2	NA	-0.144762	0.593289
GNG10	guanine nucleotide binding protein (G protein)_ gamma 10	-0.293731	0.64104
GNLY	granulysin	0	1
GPI	glucose-6-phosphate isomerase	0.0153703	0.892264
GRK4	G protein-coupled receptor kinase 4	-1.40627e-16	1
GZMA	granzyme A (granzyme 1_ cytotoxic T-lymphocyte-associated serine esterase 3)	-0.0272729	0.950668
GZMB	granzyme B (granzyme 2_ cytotoxic T-lymphocyte-associated serine esterase 1)	0	1
GZMH	granzyme H (cathepsin G-like 2_ protein h-CCPX)	0	1
GZMK	granzyme K (granzyme 3; tryptase II)	0	1
GZMM	granzyme M (lymphocyte met-ase 1)	0	1
HACD4	3-hydroxyacyl-CoA dehydratase 4	0	1
HADHB	hydroxyacyl-CoA dehydrogenase/3-ketoacyl-CoA thiolase/enoyl-CoA hydratase (trifunctional protein)_ beta subunit	-0.194786	0.477726
HAVCR2	hepatitis A virus cellular receptor 2	0	1
HDAC8	histone deacetylase 8	-0.144157	0.431142
HDC	histidine decarboxylase	0	1
HK2	hexokinase 2	0.0184569	0.941806
HK3	kallikrein-related peptidase 3	0	1
HLA-DQA1	major histocompatibility complex_ class II_ DQ alpha 1	0	1
HLA-DRA	major histocompatibility complex_ class II_ DR alpha	0	1
HLA-DRB1	major histocompatibility complex_ class II_ DR beta 1	0	1
HLA-E	major histocompatibility complex_ class I_ E	0.00747512	0.98149
HMGCR	3-hydroxy-3-methylglutaryl-CoA reductase	-0.0610854	0.875726
HSD11B1	hydroxysteroid (11-beta) dehydrogenase 1	0	1
HSPE1	heat shock 10kDa protein 1	0.0601274	0.808218
ICAM1	intercellular adhesion molecule 1	0	1
ICOS	inducible T-cell co-stimulator	0	1
ICOSLG	inducible T-cell co-stimulator ligand	0	1
ID2	inhibitor of DNA binding 2_ dominant negative helix-loop-helix protein	-0.0703893	0.94098
IDH3A	isocitrate dehydrogenase 3 (NAD+) alpha	-0.0104569	0.949182
IDO1	indoleamine 2_3-dioxygenase 1	0	1
IDO2	indoleamine 2_3-dioxygenase 2	0	1
IFI30	interferon_ gamma-inducible protein 30	-0.142444	0.627216
IFIH1 (MDA5)	NA	0	1
IFITM3	interferon induced transmembrane protein 3	0	1
IFNA1	interferon_ alpha 1	0	1
IFNB1	interferon_ beta 1_ fibroblast	0	1
IFNG	interferon_ gamma	0	1
IFNGR1	interferon gamma receptor 1	-0.293025	0.509627
IFNGR2	interferon gamma receptor 2 (interferon gamma transducer 1)	-0.0725125	0.856704
IGF1R	insulin-like growth factor 1 receptor	0.345135	0.442637
IKBKE	inhibitor of kappa light polypeptide gene enhancer in B-cells_ kinase epsilon	0.0228843	0.912417
IKZF4	IKAROS family zinc finger 4 (Eos)	0	1
IL10	interleukin 10	0	1
IL11	interleukin 11	0	1
IL12A	interleukin 12A	0	1
IL12B	interleukin 12B	0	1
IL12RB1	interleukin 12 receptor_ beta 1	0	1
IL12RB2	interleukin 12 receptor_ beta 2	0	1
IL13	interleukin 13	0	1
IL15	interleukin 15	-0.169925	0.889435
IL16	interleukin 16	0.0588937	0.888846
IL17A	interleukin 17A	0	1
IL17C	interleukin 17C	0	1
IL17F	interleukin 17F	0	1
IL18	interleukin 18	0	1
IL18BP	interleukin 18 binding protein	3.28096e-16	1
IL19	interleukin 19	0	1
IL1A	interleukin 1_ alpha	0	1
IL1B	interleukin 1_ beta	0	1
IL1F10	interleukin 1 family_ member 10 (theta)	0	1
IL1R1	interleukin 1 receptor_ type I	0	1
IL1RN	interleukin 1 receptor antagonist	0	1
IL2	interleukin 2	0	1
IL20	interleukin 20	0	1
IL21	interleukin 21	0	1
IL21R	interleukin 21 receptor	0	1
IL22	interleukin 22	0	1
IL23R	interleukin 23 receptor	0	1
IL24	interleukin 24	0	1
IL25	interleukin 25	0	1
IL26	interleukin 26	0	1
IL27	interleukin 27	0	1
IL2RA	interleukin 2 receptor_ alpha	0	1
IL2RB	interleukin 2 receptor_ beta	0	1
IL2RG	interleukin 2 receptor_ gamma	0.0475943	0.613169
IL3	interleukin 3	0	1
IL31	interleukin 31	0	1
IL33	interleukin 33	0	1
IL36A	interleukin 36_ alpha	-0.347923	0.659152
IL36B	interleukin 36_ beta	0	1
IL36G	interleukin 36_ gamma	0	1
IL36RN	interleukin 36 receptor antagonist	0	1
IL37	interleukin 37	0	1
IL3RA	interleukin 3 receptor_ alpha (low affinity)	0	1
IL4	interleukin 4	0	1
IL4R	interleukin 4 receptor	0	1
IL5	interleukin 5	0	1
IL6	interleukin 6	0	1
IL6R	interleukin 6 receptor	0	1
IL6ST	interleukin 6 signal transducer	0.0187366	0.968849
IL7	interleukin 7	0	1
IL9	interleukin 9	0	1
IRF1	interferon regulatory factor 1	-0.0356239	0.958185
IRF4	interferon regulatory factor 4	0	1
IRF5	interferon regulatory factor 5	0	1
IRF6	interferon regulatory factor 6	0	1
IRF8	interferon regulatory factor 8	-0.222392	0.686587
ITGAM	integrin_ alpha M (complement component 3 receptor 3 subunit)	0	1
ITGB2	integrin_ beta 2 (complement component 3 receptor 3 and 4 subunit)	-0.00543389	0.984058
JAG1	jagged 1	0	1
JAK1	Janus kinase 1	0.0283818	0.94113
JAK2	Janus kinase 2	0.14543	0.807363
JUN	jun proto-oncogene	-0.263034	0.862217
JUNB	jun B proto-oncogene	0.127756	0.880704
KIR3DL1/2	NA	0	1
KLRB1	killer cell lectin-like receptor subfamily B_ member 1	0	1
KLRC1/2	NA	0	1
KLRD1	killer cell lectin-like receptor subfamily D_ member 1	0	1
KLRF1	killer cell lectin-like receptor subfamily F_ member 1	0	1
KLRK1	killer cell lectin-like receptor subfamily K_ member 1	0	1
KYAT1	NA	-0.368645	0.399362
LAG3	lymphocyte-activation gene 3	0	1
LAMP2	lysosomal-associated membrane protein 2	-0.115482	0.446777
LDHA	lactate dehydrogenase A	-0.0434188	0.862673
LDHC	lactate dehydrogenase C	0	1
LEFTY1	left-right determination factor 1	0	1
LIF	leukemia inhibitory factor	0	1
LILRA1	leukocyte immunoglobulin-like receptor_ subfamily A (with TM domain)_ member 1	0	1
LILRA5	leukocyte immunoglobulin-like receptor_ subfamily A (with TM domain)_ member 5	0	1
LILRB2	leukocyte immunoglobulin-like receptor_ subfamily B (with TM and ITIM domains)_ member 2	0	1
LILRB3	leukocyte immunoglobulin-like receptor_ subfamily B (with TM and ITIM domains)_ member 3	0	1
LILRB4	leukocyte immunoglobulin-like receptor_ subfamily B (with TM and ITIM domains)_ member 4	0	1
LIN28A	lin-28 homolog A (C. elegans)	0	1
LIN28B	lin-28 homolog B (C. elegans)	0	1
LNX1	ligand of numb-protein X 1_ E3 ubiquitin protein ligase	0	1
LPAR6	lysophosphatidic acid receptor 6	0.366782	0.511842
LTA	lymphotoxin alpha	0	1
LTB	lymphotoxin beta (TNF superfamily_ member 3)	0.530515	0.608197
MAF	v-maf avian musculoaponeurotic fibrosarcoma oncogene homolog	0	1
MAGED1	melanoma antigen family D1	-0.118868	0.648745
MALAT1	metastasis associated lung adenocarcinoma transcript 1 (non-protein coding)	0	1
MAML2	mastermind-like transcriptional coactivator 2	0	1
MAML3	mastermind-like transcriptional coactivator 3	0	1
MAP2K7	mitogen-activated protein kinase kinase 7	0.142353	0.581367
MAP3K14	mitogen-activated protein kinase kinase kinase 14	-0.415037	0.427614
MAPK12	mitogen-activated protein kinase 12	0.186413	0.763482
MAPK3	mitogen-activated protein kinase 3	-0.229026	0.550728
MAVS	mitochondrial antiviral signaling protein	0	1
MAX	MYC associated factor X	0.0501079	0.695125
MCAT	malonyl CoA:ACP acyltransferase (mitochondrial)	0.332575	0.640494
MDFIC	MyoD family inhibitor domain containing	0	1
MDH2	malate dehydrogenase 2_ NAD (mitochondrial)	-0.210567	0.475256
METTL14	methyltransferase like 14	0	1
METTL3	methyltransferase like 3	0	1
MIF	macrophage migration inhibitory factor (glycosylation-inhibiting factor)	-0.000746157	0.996823
MINOS1	mitochondrial inner membrane organizing system 1	0	1
MMP2	matrix metallopeptidase 2	0	1
MMP9	matrix metallopeptidase 9	0	1
MPC2	mitochondrial pyruvate carrier 2	-0.210469	0.410717
MR1	major histocompatibility complex_ class I-related	0.222392	0.709184
MS4A1	membrane-spanning 4-domains_ subfamily A_ member 1	0	1
MS4A2	membrane-spanning 4-domains_ subfamily A_ member 2	0	1
MS4A4A	membrane-spanning 4-domains_ subfamily A_ member 4A	0	1
MTCP1	mature T-cell proliferation 1	-0.306103	0.608099
MTHFD1L	methylenetetrahydrofolate dehydrogenase (NADP+ dependent) 1-like	0.0545655	0.696436
MTHFR	methylenetetrahydrofolate reductase (NAD(P)H)	-0.0365259	0.944418
MTOR	mechanistic target of rapamycin (serine/threonine kinase)	-0.0421255	0.869091
MYC	v-myc avian myelocytomatosis viral oncogene homolog	-0.067936	0.685096
MYL9	myosin_ light chain 9_ regulatory	0	1
NAA20	N(alpha)-acetyltransferase 20_ NatB catalytic subunit	-0.0464801	0.790188
NBL1	neuroblastoma 1_ DAN family BMP antagonist	0	1
NCAM1	neural cell adhesion molecule 1	0	1
NCAPG2	non-SMC condensin II complex_ subunit G2	-0.139803	0.571584
NCR1	natural cytotoxicity triggering receptor 1	0	1
NCR2	natural cytotoxicity triggering receptor 2	0	1
NCR3	natural cytotoxicity triggering receptor 3	0	1
NDUFA4	NDUFA4_ mitochondrial complex associated	0.140492	0.485988
NDUFAB1	NADH dehydrogenase (ubiquinone) 1_ alpha/beta subcomplex_ 1_ 8kDa	-0.0100642	0.973907
NEAT1	nuclear paraspeckle assembly transcript 1 (non-protein coding)	0	1
NEDD8	neural precursor cell expressed_ developmentally down-regulated 8	0.0335136	0.865502
NEK2	NIMA-related kinase 2	-0.170685	0.450892
NFAT5	nuclear factor of activated T-cells 5_ tonicity-responsive	0.245112	0.657905
NFATC1	nuclear factor of activated T-cells_ cytoplasmic_ calcineurin-dependent 1	-0.116645	0.681108
NFATC2IP	nuclear factor of activated T-cells_ cytoplasmic_ calcineurin-dependent 2 interacting protein	-0.0136749	0.954758
NFKBIA	nuclear factor of kappa light polypeptide gene enhancer in B-cells inhibitor_ alpha	-0.107856	0.735213
NME1	NME/NM23 nucleoside diphosphate kinase 1	-0.000929272	0.996574
NOD2	nucleotide-binding oligomerization domain containing 2	0	1
NOTCH2	notch 2	0.207233	0.658605
NR3C1	nuclear receptor subfamily 3_ group C_ member 1 (glucocorticoid receptor)	9.06079e-17	1
NRF1	nuclear respiratory factor 1	0.449803	0.437191
NRL	neural retina leucine zipper	0	1
NT5E	5'-nucleotidase_ ecto (CD73)	-0.0962153	0.931043
OASL	2'-5'-oligoadenylate synthetase-like	0	1
OAT	ornithine aminotransferase	-0.183005	0.54054
OMA1	OMA1 zinc metallopeptidase	0.00795086	0.964368
PARP1	poly (ADP-ribose) polymerase 1	-0.0783617	0.582992
PCCA	propionyl CoA carboxylase_ alpha polypeptide	0.352672	0.389019
PCK2	phosphoenolpyruvate carboxykinase 2 (mitochondrial)	-0.342392	0.475331
PDCD1	programmed cell death 1	0	1
PDCD1LG2	programmed cell death 1 ligand 2	0	1
PDGFRA	platelet-derived growth factor receptor_ alpha polypeptide	0	1
PDK3	pyruvate dehydrogenase kinase_ isozyme 3	-0.0137401	0.973569
PDPN	podoplanin	0	1
PFKFB4	6-phosphofructo-2-kinase/fructose-2_6-biphosphatase 4	-0.249359	0.52211
PFKL	phosphofructokinase_ liver	-0.0716125	0.691669
PGAM1	phosphoglycerate mutase 1 (brain)	-0.0835731	0.687604
PGK1	phosphoglycerate kinase 1	-0.0532118	0.83911
PIDD1	p53-induced death domain protein 1	-0.277534	0.707408
PIK3C3	phosphatidylinositol 3-kinase_ catalytic subunit type 3	0.0728789	0.848838
PIK3R2	phosphoinositide-3-kinase_ regulatory subunit 2 (beta)	-0.27684	0.723359
PIK3R3	phosphoinositide-3-kinase_ regulatory subunit 3 (gamma)	-0.13217	0.547508
PLA2G4B	phospholipase A2_ group IVB (cytosolic)	0	1
PLCB2	phospholipase C_ beta 2	0.296982	0.707701
PLCB3	phospholipase C_ beta 3 (phosphatidylinositol-specific)	0	1
PLCG1	phospholipase C_ gamma 1	-0.0389111	0.802038
PML	promyelocytic leukemia	0.0117772	0.973518
PNOC	prepronociceptin	0	1
PPARA	peroxisome proliferator-activated receptor alpha	-0.0740006	0.908409
PPARD	peroxisome proliferator-activated receptor delta	0	1
PPARGC1A	peroxisome proliferator-activated receptor gamma_ coactivator 1 alpha	0	1
PPAT	phosphoribosyl pyrophosphate amidotransferase	-0.112989	0.448897
PPIA	peptidylprolyl isomerase A (cyclophilin A)	0.198876	0.597167
PPP3CA	protein phosphatase 3_ catalytic subunit_ alpha isozyme	0.0632181	0.947146
PPT2	palmitoyl-protein thioesterase 2	-0.671377	0.447805
PRDM1	PR domain containing 1_ with ZNF domain	0	1
PRF1	perforin 1 (pore forming protein)	0.226771	0.728429
PRICKLE3	prickle homolog 3	0.0641303	0.896092
PRKAB2	protein kinase_ AMP-activated_ beta 2 non-catalytic subunit	-0.0901978	0.854016
PRKCB	protein kinase C_ beta	3.04933e-15	1
PRKCD	protein kinase C_ delta	-0.202817	0.658611
PROCR	protein C receptor_ endothelial	0	1
PSMA2	proteasome subunit alpha 2	-0.0963873	0.694165
PSMA3	proteasome subunit alpha 3	0.0315912	0.895059
PSMA6	proteasome subunit alpha 6	-0.0690078	0.802375
PSMB10	proteasome subunit beta 10	0.222392	0.56747
PTCD1	pentatricopeptide repeat domain 1	0.0703893	0.909178
PTGDR2	prostaglandin D2 receptor 2	0	1
PTGER2	prostaglandin E receptor 2 (subtype EP2)_ 53kDa	0	1
PTGER4	prostaglandin E receptor 4 (subtype EP4)	0.188072	0.531161
PTGS1	prostaglandin-endoperoxide synthase 1 (prostaglandin G/H synthase and cyclooxygenase)	0	1
PTGS2	prostaglandin-endoperoxide synthase 2 (prostaglandin G/H synthase and cyclooxygenase)	0	1
PTK2B	protein tyrosine kinase 2 beta	-0.040898	0.882899
PTPN6	protein tyrosine phosphatase_ non-receptor type 6	-0.105547	0.503624
PYCR1	pyrroline-5-carboxylate reductase 1	0.125819	0.412847
PYCR2	pyrroline-5-carboxylate reductase family_ member 2	0.177882	0.406789
PYCR3	pyrroline-5-carboxylate reductase-like	-0.271302	0.710518
RAC2	ras-related C3 botulinum toxin substrate 2 (rho family_ small GTP binding protein Rac2)	-0.175836	0.858896
RAI1	retinoic acid induced 1	0.0608822	0.814784
RARB	retinoic acid receptor_ beta	0	1
RARG	retinoic acid receptor_ gamma	-0.371893	0.654147
RBX1	ring-box 1_ E3 ubiquitin protein ligase	-0.0595664	0.824067
RDH14	retinol dehydrogenase 14 (all-trans/9-cis/11-cis)	-0.217357	0.621596
RDH5	retinol dehydrogenase 5 (11-cis/9-cis)	0	1
RELA	v-rel avian reticuloendotheliosis viral oncogene homolog A	0.0093987	0.976644
RIMKLA	ribosomal modification protein rimK-like family member A	-0.0317089	0.95562
RNASEL	ribonuclease L (2'_5'-oligoisoadenylate synthetase-dependent)	-0.180572	0.677229
RORC	RAR-related orphan receptor C	0.203533	0.749069
RPL23	ribosomal protein L23	-0.130641	0.655724
RPL3	ribosomal protein L3	-0.0520222	0.768248
RPTOR	regulatory associated protein of MTOR_ complex 1	-0.222392	0.72104
RUNX3	runt-related transcription factor 3	0.060754	0.83002
S100A12	S100 calcium binding protein A12	0	1
SCD	stearoyl-CoA desaturase (delta-9-desaturase)	-0.0136784	0.936288
SDHB	succinate dehydrogenase complex_ subunit B_ iron sulfur (Ip)	-0.0839573	0.568191
SEC22B	SEC22 homolog B_ vesicle trafficking protein (gene/pseudogene)	-0.0634791	0.866792
SELL	selectin L	0.203238	0.41607
SELPLG	selectin P ligand	0	1
SERINC4	serine incorporator 4	0	1
SERPINB9	serpin peptidase inhibitor_ clade B (ovalbumin)_ member 9	0.0951572	0.87219
SGK3	serum/glucocorticoid regulated kinase family_ member 3	-0.341037	0.604551
SGO2	shugoshin-like 2 (S. pombe)	0.023031	0.886418
SH2D1A	SH2 domain containing 1A	-0.177296	0.478952
SH3BP2	SH3-domain binding protein 2	-0.0864148	0.841141
SHMT1	serine hydroxymethyltransferase 1 (soluble)	0.0811454	0.594572
SIGLEC5	sialic acid binding Ig-like lectin 5	0	1
SLAMF7	SLAM family member 7	0	1
SLC25A20	solute carrier family 25 (carnitine/acylcarnitine translocase)_ member 20	-0.0501235	0.888714
SLC25A6	solute carrier family 25 (mitochondrial carrier; adenine nucleotide translocator)_ member 6	0.0173337	0.942281
SLC27A3	solute carrier family 27 (fatty acid transporter)_ member 3	0	1
SLC2A1	solute carrier family 2 (facilitated glucose transporter)_ member 1	0.422691	0.516759
SLC2A11	solute carrier family 2 (facilitated glucose transporter)_ member 11	-0.270089	0.538287
SLC2A2	solute carrier family 2 (facilitated glucose transporter)_ member 2	0	1
SLC3A2	solute carrier family 3 (amino acid transporter heavy chain)_ member 2	0.0487914	0.864796
SLC7A5	solute carrier family 7 (amino acid transporter light chain_ L system)_ member 5	-0.102483	0.472334
SMAD2	SMAD family member 2	-0.0245197	0.859125
SMAD3	SMAD family member 3	-0.108934	0.750543
SMAD5	SMAD family member 5	0.115477	0.69031
SMC2	structural maintenance of chromosomes 2	-0.00384411	0.980092
SMURF1	SMAD specific E3 ubiquitin protein ligase 1	-0.358454	0.524771
SOCS4	suppressor of cytokine signaling 4	-0.00672586	0.974087
SOCS5	suppressor of cytokine signaling 5	-0.289507	0.626644
SOX4	SRY (sex determining region Y)-box 4	0	1
SP100	SP100 nuclear antigen	0.47478	0.392602
SPIB	Spi-B transcription factor (Spi-1/PU.1 related)	0	1
SRC	SRC proto-oncogene_ non-receptor tyrosine kinase	-0.288345	0.477143
SRR	serine racemase	-0.398407	0.787392
STAT4	signal transducer and activator of transcription 4	0	1
STAT5A	signal transducer and activator of transcription 5A	-0.329841	0.794646
STAT5B	signal transducer and activator of transcription 5B	-0.0848084	0.744373
STAT6	signal transducer and activator of transcription 6_ interleukin-4 induced	0.0969617	0.646983
TAOK2	TAO kinase 2	0.0473057	0.921124
TBX21	T-box 21	0	1
TCL1A	T-cell leukemia/lymphoma 1A	0	1
TET2	tet methylcytosine dioxygenase 2	-0.0299532	0.963194
TFB2M	transcription factor B2_ mitochondrial	0.0967851	0.593333
TFDP1	transcription factor Dp-1	-0.030724	0.896367
TFRC	transferrin receptor	0.0753945	0.628818
TICAM1	toll-like receptor adaptor molecule 1	0.537548	0.685822
TIGIT	T cell immunoreceptor with Ig and ITIM domains	0	1
TIMM17A	translocase of inner mitochondrial membrane 17 homolog A (yeast)	0.0925661	0.624154
TIMM23	translocase of inner mitochondrial membrane 23 homolog (yeast)	-0.00254444	0.98989
TIMP1	TIMP metallopeptidase inhibitor 1	0	1
TKT	transketolase	0.0947506	0.488694
TLR2	toll-like receptor 2	0	1
TLR4	toll-like receptor 4	0	1
TLR9	toll-like receptor 9	0	1
TNF	tumor necrosis factor	0	1
TNFRSF10B	tumor necrosis factor receptor superfamily_ member 10b	-1.60754e-15	1
TNFRSF11A	tumor necrosis factor receptor superfamily_ member 11a_ NFKB activator	0	1
TNFRSF17	tumor necrosis factor receptor superfamily_ member 17	0	1
TNFRSF18	tumor necrosis factor receptor superfamily_ member 18	0	1
TNFRSF4	tumor necrosis factor receptor superfamily_ member 4	0	1
TNFRSF9	tumor necrosis factor receptor superfamily_ member 9	0	1
TNFSF13B	tumor necrosis factor (ligand) superfamily_ member 13b	0	1
TOLLIP	toll interacting protein	0.175367	0.539395
TOMM6	translocase of outer mitochondrial membrane 6 homolog (yeast)	-0.00594927	0.978728
TP53	tumor protein p53	0.0227201	0.969159
TPSAB1/B2	NA	0	1
TRAF5	TNF receptor-associated factor 5	-0.028289	0.927943
TRAF6	TNF receptor-associated factor 6_ E3 ubiquitin protein ligase	0.00786212	0.975965
TRAT1	T cell receptor associated transmembrane adaptor 1	-0.162898	0.696985
TRAV1-1	T cell receptor alpha variable 1-1	0	1
TRAV1-2	T cell receptor alpha variable 1-2	0	1
TRAV10	T cell receptor alpha variable 10	0	1
TRAV11	T cell receptor alpha variable 11 (pseudogene)	0	1
TRAV12-1	T cell receptor alpha variable 12-1	0	1
TRAV12-2	T cell receptor alpha variable 12-2	0	1
TRAV12-3	T cell receptor alpha variable 12-3	0	1
TRAV13-1	T cell receptor alpha variable 13-1	0	1
TRAV13-2	T cell receptor alpha variable 13-2	0	1
TRAV14	NA	0	1
TRAV16	T cell receptor alpha variable 16	-0.215729	0.762387
TRAV17	T cell receptor alpha variable 17	-0.314109	0.677481
TRAV18	T cell receptor alpha variable 18	-0.167457	0.79932
TRAV2	T cell receptor alpha variable 2	0	1
TRAV20	T cell receptor alpha variable 20	0	1
TRAV21	T cell receptor alpha variable 21	0	1
TRAV22	T cell receptor alpha variable 22	0	1
TRAV23	NA	0	1
TRAV24	T cell receptor alpha variable 24	0	1
TRAV25	T cell receptor alpha variable 25	0	1
TRAV26-1	T cell receptor alpha variable 26-1	0	1
TRAV26-2	T cell receptor alpha variable 26-2	0	1
TRAV27	T cell receptor alpha variable 27	0	1
TRAV29	NA	0	1
TRAV3	T cell receptor alpha variable 3 (gene/pseudogene)	0	1
TRAV30	T cell receptor alpha variable 30	0	1
TRAV34	T cell receptor alpha variable 34	0	1
TRAV35	T cell receptor alpha variable 35	0	1
TRAV36	NA	0	1
TRAV38-1	T cell receptor alpha variable 38-1	0	1
TRAV38-2	NA	0	1
TRAV39	T cell receptor alpha variable 39	0	1
TRAV4	T cell receptor alpha variable 4	0	1
TRAV40	T cell receptor alpha variable 40	0	1
TRAV41	T cell receptor alpha variable 41	0	1
TRAV5	T cell receptor alpha variable 5	0	1
TRAV6	T cell receptor alpha variable 6	0	1
TRAV7	T cell receptor alpha variable 7	0	1
TRAV8-1	T cell receptor alpha variable 8-1	0	1
TRAV8-2	T cell receptor alpha variable 8-2	-0.0469779	0.743201
TRAV8-3	T cell receptor alpha variable 8-3	0	1
TRAV8-6	T cell receptor alpha variable 8-6	0	1
TRAV9-1	T cell receptor alpha variable 9-1	0	1
TRAV9-2	T cell receptor alpha variable 9-2	0	1
TRBV10-1	T cell receptor beta variable 10-1(gene/pseudogene)	0	1
TRBV10-2	T cell receptor beta variable 10-2	0	1
TRBV10-3	T cell receptor beta variable 10-3	-8.26059e-16	1
TRBV11-1	T cell receptor beta variable 11-1	0	1
TRBV11-2	T cell receptor beta variable 11-2	0	1
TRBV11-3	T cell receptor beta variable 11-3	0	1
TRBV12-3	T cell receptor beta variable 12-3	-0.241349	0.533634
TRBV12-5	T cell receptor beta variable 12-5	0	1
TRBV13	T cell receptor beta variable 13	-0.423808	0.402174
TRBV14	T cell receptor beta variable 14	0	1
TRBV15	T cell receptor beta variable 15	0	1
TRBV16	T cell receptor beta variable 16 (gene/pseudogene)	0	1
TRBV18	T cell receptor beta variable 18	0	1
TRBV19	T cell receptor beta variable 19	0	1
TRBV2	T cell receptor beta variable 2	0	1
TRBV20-1	T cell receptor beta variable 20-1	0	1
TRBV24-1	T cell receptor beta variable 24-1	0	1
TRBV25-1	T cell receptor beta variable 25-1	0	1
TRBV27	T cell receptor beta variable 27	0	1
TRBV28	T cell receptor beta variable 28	-0.30355	0.495934
TRBV29-1	T cell receptor beta variable 29-1	0	1
TRBV3-1	T cell receptor beta variable 3-1	0	1
TRBV30	T cell receptor beta variable 30 (gene/pseudogene)	0	1
TRBV4-1	T cell receptor beta variable 4-1	0	1
TRBV4-2	T cell receptor beta variable 4-2	0	1
TRBV4-3	T cell receptor beta variable 4-3	0	1
TRBV5-1	T cell receptor beta variable 5-1	0	1
TRBV5-4	T cell receptor beta variable 5-4	0	1
TRBV5-5	T cell receptor beta variable 5-5	0	1
TRBV5-6	T cell receptor beta variable 5-6	0	1
TRBV5-8	T cell receptor beta variable 5-8	0	1
TRBV6-1	T cell receptor beta variable 6-1	0	1
TRBV6-2	T cell receptor beta variable 6-2 (gene/pseudogene)	0	1
TRBV6-4	T cell receptor beta variable 6-4	0	1
TRBV6-5	T cell receptor beta variable 6-5	0	1
TRBV6-6	T cell receptor beta variable 6-6	0	1
TRBV6-8	T cell receptor beta variable 6-8	0	1
TRBV6-9	T cell receptor beta variable 6-9	-0.0418202	0.938189
TRBV7-3	T cell receptor beta variable 7-3	0.243926	0.7256
TRBV7-4	T cell receptor beta variable 7-4 (gene/pseudogene)	0	1
TRBV7-6	T cell receptor beta variable 7-6	0	1
TRBV7-7	T cell receptor beta variable 7-7	0	1
TRBV7-9	T cell receptor beta variable 7-9	0	1
TRBV9	T cell receptor beta variable 9	0	1
TRDC	T cell receptor delta constant	0	1
TRDV1	T cell receptor delta variable 1	0	1
TRDV2	T cell receptor delta variable 2	0	1
TRDV3	T cell receptor delta variable 3	0	1
TREM1	triggering receptor expressed on myeloid cells 1	0	1
TRGC1	T cell receptor gamma constant 1	0	1
TRGC2	T cell receptor gamma constant 2	0	1
TRGV2	T cell receptor gamma variable 2	0	1
TRGV4	T cell receptor gamma variable 4	0	1
TRGV8	T cell receptor gamma variable 8	0.347923	0.518333
TRGV9	T cell receptor gamma variable 9	0	1
TRIM10	tripartite motif containing 10	0	1
TRIM22	tripartite motif containing 22	0	1
TRIM26	tripartite motif containing 26	0.169925	0.607984
TRIM31	tripartite motif containing 31	0	1
TRIM33	tripartite motif containing 33	0.0600404	0.688152
TRIM34	tripartite motif containing 34	0.0182622	0.970917
TSC2	tuberous sclerosis 2	-0.0851166	0.74026
TYK2	tyrosine kinase 2	-0.121306	0.763404
TYROBP	TYRO protein tyrosine kinase binding protein	0	1
UBA5	ubiquitin-like modifier activating enzyme 5	0.140373	0.812724
UQCR10	ubiquinol-cytochrome c reductase_ complex III subunit X	0.211055	0.686259
USP15	ubiquitin specific peptidase 15	-0.316027	0.439376
USP18	ubiquitin specific peptidase 18	0.439984	0.545988
VSIR	NA	-0.125531	0.825081
XAF1	XIAP associated factor 1	0.706269	0.491809
XCL1/2	NA	0	1

## Sheet: KO IFN vs KO
Symbol	Description	log2FoldChange	pvalue
SGK3	serum/glucocorticoid regulated kinase family_ member 3	-3.92871	2.52112e-11			total DE genes	237
TRAV17	T cell receptor alpha variable 17	-3.75569	1.53977e-10			up regulated	71
NDUFAB1	NADH dehydrogenase (ubiquinone) 1_ alpha/beta subcomplex_ 1_ 8kDa	-1.17897	5.57813e-10			downregulated	166
CS	citrate synthase	-0.678016	5.98843e-09
LDHA	lactate dehydrogenase A	-0.938551	6.12444e-09
PIK3R2	phosphoinositide-3-kinase_ regulatory subunit 2 (beta)	-3.53955	5.22668e-09
PPIA	peptidylprolyl isomerase A (cyclophilin A)	-1.46803	1.34321e-08
ATP5MF	NA	-1.92889	1.54569e-08
PGAM1	phosphoglycerate mutase 1 (brain)	-0.741478	2.28481e-08
CASP8	caspase 8_ apoptosis-related cysteine peptidase	1.06341	3.2229e-08
RIMKLA	ribosomal modification protein rimK-like family member A	-3.29335	1.24676e-07
SOCS5	suppressor of cytokine signaling 5	-3.57237	1.51962e-07
DHFR2	NA	2.12409	1.88568e-07
ALDOA	aldolase A_ fructose-bisphosphate	-0.487051	2.46161e-07
CDC42	cell division cycle 42	-1.05844	5.18205e-07
PSMA3	proteasome subunit alpha 3	-0.89716	4.87009e-07
PGK1	phosphoglycerate kinase 1	-0.9916	6.86384e-07
RPL23	ribosomal protein L23	-1.02265	8.16507e-07
TFRC	transferrin receptor	-0.593724	8.15865e-07
TRBV6-9	T cell receptor beta variable 6-9	-3.04898	8.1267e-07
BCL2	B-cell CLL/lymphoma 2	-2.92209	9.68306e-07
COX6C	cytochrome c oxidase subunit VIc	-1.03802	9.8392e-07
TYK2	tyrosine kinase 2	1.22114	1.22499e-06
CD3D	CD3d molecule_ delta (CD3-TCR complex)	-0.940502	1.86405e-06
PSMA2	proteasome subunit alpha 2	-0.91641	2.30796e-06
MTHFR	methylenetetrahydrofolate reductase (NAD(P)H)	-2.85624	2.83353e-06
PRKCB	protein kinase C_ beta	-1.65869	4.43169e-06
GADD45B	growth arrest and DNA-damage-inducible_ beta	4.4133	4.87944e-06
FH	fumarate hydratase	-0.94054	7.0328e-06
PPP3CA	protein phosphatase 3_ catalytic subunit_ alpha isozyme	-2.75451	6.91124e-06
SLC25A6	solute carrier family 25 (mitochondrial carrier; adenine nucleotide translocator)_ member 6	-0.885541	8.22666e-06
SMC2	structural maintenance of chromosomes 2	-0.536016	8.14968e-06
HSPE1	heat shock 10kDa protein 1	-0.816336	9.33628e-06
MAGED1	melanoma antigen family D1	-0.956521	9.33775e-06
TRBV12-3	T cell receptor beta variable 12-3	-1.38867	8.85893e-06
GLUD1/2	NA	-0.966334	1.0158e-05
SH2D1A	SH2 domain containing 1A	-0.877674	1.21726e-05
STAT5A	signal transducer and activator of transcription 5A	-2.73985	1.53322e-05
SMAD5	SMAD family member 5	-1.09876	1.5931e-05
COX7A2	cytochrome c oxidase subunit VIIa polypeptide 2 (liver)	-1.19758	1.63515e-05
SELL	selectin L	-0.902783	1.85417e-05
JUN	jun proto-oncogene	6.3339	2.08036e-05
PSMA6	proteasome subunit alpha 6	-0.792136	2.10024e-05
USP15	ubiquitin specific peptidase 15	1.17982	2.22411e-05
PLCB2	phospholipase C_ beta 2	3.15549	2.54427e-05
HMGCR	3-hydroxy-3-methylglutaryl-CoA reductase	-1.36227	2.7106e-05
TET2	tet methylcytosine dioxygenase 2	-2.19068	2.70727e-05
TRAF6	TNF receptor-associated factor 6_ E3 ubiquitin protein ligase	0.718673	2.82482e-05
CD3E	CD3e molecule_ epsilon (CD3-TCR complex)	-0.422218	3.20303e-05
COX4I1	cytochrome c oxidase subunit IV isoform 1	-0.58939	3.7288e-05
IRF3	interferon regulatory factor 3	-2.71755	3.72775e-05
IL15	interleukin 15	4.0199	3.84991e-05
CD3G	CD3g molecule_ gamma (CD3-TCR complex)	-0.656439	4.04429e-05
NME1	NME/NM23 nucleoside diphosphate kinase 1	-0.765857	3.97914e-05
PIK3R3	phosphoinositide-3-kinase_ regulatory subunit 3 (gamma)	-0.771114	5.24453e-05
AKT1	v-akt murine thymoma viral oncogene homolog 1	-1.827	5.51665e-05
ATP6V1F	ATPase_ H+ transporting_ lysosomal 14kDa_ V1 subunit F	-1.15463	7.25972e-05
RAI1	retinoic acid induced 1	0.75192	7.49919e-05
RBX1	ring-box 1_ E3 ubiquitin protein ligase	-0.875763	8.0124e-05
MPC2	mitochondrial pyruvate carrier 2	-0.962431	8.95705e-05
NDUFA6	NADH dehydrogenase (ubiquinone) 1 alpha subcomplex_ 6_ 14kDa	-0.698001	9.68656e-05
UQCR10	ubiquinol-cytochrome c reductase_ complex III subunit X	-1.63413	0.000107964
DDIT4	DNA-damage-inducible transcript 4	1.8606	0.000110137
CD28	CD28 molecule	-1.1078	0.000130726
JAK1	Janus kinase 1	1.16875	0.000148436
MIF	macrophage migration inhibitory factor (glycosylation-inhibiting factor)	-0.649424	0.000147975
PPARA	peroxisome proliferator-activated receptor alpha	1.62344	0.0001483
UBA5	ubiquitin-like modifier activating enzyme 5	-1.80296	0.000145332
NME2	NME/NM23 nucleoside diphosphate kinase 2	-0.763387	0.000152862
PKM	pyruvate kinase_ muscle	-0.230753	0.000165456
TRAV19	T cell receptor alpha variable 19	1.27711	0.000163402
NT5E	5'-nucleotidase_ ecto (CD73)	3.1964	0.000175862
PPT2	palmitoyl-protein thioesterase 2	-4.52356	0.000174696
IL32	interleukin 32	-0.559548	0.000185861
IRF7	interferon regulatory factor 7	5.35252	0.000198498
IRF9	interferon regulatory factor 9	4.9	0.000209686
MAPK3	mitogen-activated protein kinase 3	-1.29698	0.000223681
NFKBIA	nuclear factor of kappa light polypeptide gene enhancer in B-cells inhibitor_ alpha	0.896377	0.000225785
PPAT	phosphoribosyl pyrophosphate amidotransferase	-0.483042	0.000235936
GNG10	guanine nucleotide binding protein (G protein)_ gamma 10	-3.1897	0.000245279
SRR	serine racemase	-2.18903	0.000247521
JUNB	jun B proto-oncogene	2.72792	0.000271485
PIDD1	p53-induced death domain protein 1	2.08746	0.000311375
SKP1	S-phase kinase-associated protein 1	-1.01312	0.000305138
TRAV18	T cell receptor alpha variable 18	-3.1289	0.000309499
SLC2A1	solute carrier family 2 (facilitated glucose transporter)_ member 1	-3.12461	0.000318554
PDK3	pyruvate dehydrogenase kinase_ isozyme 3	-1.25329	0.000366428
IFNGR2	interferon gamma receptor 2 (interferon gamma transducer 1)	-1.6105	0.000409856
VAV1	vav 1 guanine nucleotide exchange factor	-0.359007	0.000407022
COX7B	cytochrome c oxidase subunit VIIb	-0.928606	0.000427374
TRIM34	tripartite motif containing 34	-1.74706	0.000428998
FAM30A	KIAA0125	-1.67807	0.000454623
IL16	interleukin 16	1.28219	0.000463926
PSPH	phosphoserine phosphatase	-1.97451	0.000473973
CCNC	cyclin C	-0.513976	0.000489183
HDAC7	histone deacetylase 7	1.23704	0.000484221
CDC26	cell division cycle 26	-0.657111	0.000504635
TIMM17A	translocase of inner mitochondrial membrane 17 homolog A (yeast)	-0.597133	0.000542782
TRBV10-3	T cell receptor beta variable 10-3	3.49185	0.000560217
PYCR2	pyrroline-5-carboxylate reductase family_ member 2	-0.645996	0.000580501
CD1A	CD1a molecule	-0.98216	0.000624555
PML	promyelocytic leukemia	1.08508	0.000640329
SP100	SP100 nuclear antigen	1.7291	0.000651777
ACADVL	acyl-CoA dehydrogenase_ very long chain	1.26911	0.000691994
ACVR1B	activin A receptor_ type IB	1.3599	0.00070431
PECAM1	platelet/endothelial cell adhesion molecule 1	-0.572853	0.000718143
UQCRQ	ubiquinol-cytochrome c reductase_ complex III subunit VII_ 9.5kDa	-0.589967	0.000721054
NAA20	N(alpha)-acetyltransferase 20_ NatB catalytic subunit	-0.527512	0.000770426
RPTOR	regulatory associated protein of MTOR_ complex 1	-2.79242	0.000774634
CD99	CD99 molecule	-0.604546	0.000798117
STAT1	signal transducer and activator of transcription 1_ 91kDa	2.64448	0.000790968
NDUFA1	NADH dehydrogenase (ubiquinone) 1 alpha subcomplex_ 1_ 7.5kDa	-1.2699	0.00081618
CDKN1A	cyclin-dependent kinase inhibitor 1A (p21_ Cip1)	2.53051	0.000903036
COX6B1	cytochrome c oxidase subunit VIb polypeptide 1 (ubiquitous)	-0.823207	0.000904019
PIK3C3	phosphatidylinositol 3-kinase_ catalytic subunit type 3	0.864022	0.000931298
OAS1	2'-5'-oligoadenylate synthetase 1_ 40/46kDa	5.2676	0.000967008
NEDD8	neural precursor cell expressed_ developmentally down-regulated 8	-0.609619	0.0010097
COX5B	cytochrome c oxidase subunit Vb	-0.834439	0.00102828
XAF1	XIAP associated factor 1	3.5216	0.00107143
IFI35	interferon-induced protein 35	3.03562	0.00110468
OAT	ornithine aminotransferase	-0.839535	0.00115263
VAV3	vav 3 guanine nucleotide exchange factor	-0.297384	0.00114723
RNASEL	ribonuclease L (2'_5'-oligoisoadenylate synthetase-dependent)	1.29039	0.00116714
BCL6	B-cell CLL/lymphoma 6	3.12338	0.00134716
CD45RA	NA	-1.19878	0.00133785
GRK4	G protein-coupled receptor kinase 4	2	0.0014023
ISG15	ISG15 ubiquitin-like modifier	2.86138	0.00142982
IL2RG	interleukin 2 receptor_ gamma	-0.252036	0.00150757
SEC22B	SEC22 homolog B_ vesicle trafficking protein (gene/pseudogene)	-0.923548	0.00151391
IFIT3	interferon-induced protein with tetratricopeptide repeats 3	6.21594	0.00152829
ADORA2A	adenosine A2a receptor	2.04836	0.00157909
SLC3A2	solute carrier family 3 (amino acid transporter heavy chain)_ member 2	0.791235	0.00159807
ATG14	autophagy related 14	0.862048	0.00169798
LTB	lymphotoxin beta (TNF superfamily_ member 3)	2.42951	0.00173166
USP18	ubiquitin specific peptidase 18	2.21871	0.00183521
CKAP5	cytoskeleton associated protein 5	-1.05649	0.00192202
GFM1	G elongation factor_ mitochondrial 1	-0.955877	0.00190844
TICAM1	toll-like receptor adaptor molecule 1	-1.60407	0.00193415
TRBC1/2	NA	-0.499722	0.00196121
MAP2K2	mitogen-activated protein kinase kinase 2	-0.489266	0.00205738
PYCR3	pyrroline-5-carboxylate reductase-like	-2.5025	0.00209929
GART	phosphoribosylglycinamide formyltransferase_ phosphoribosylglycinamide synthetase_ phosphoribosylaminoimidazole synthetase	-0.562505	0.00216629
MDH2	malate dehydrogenase 2_ NAD (mitochondrial)	0.763766	0.0021674
CD69	CD69 molecule	-3.34577	0.0021851
OAS3	2'-5'-oligoadenylate synthetase 3_ 100kDa	2.32536	0.00221858
DGLUCY	NA	1.07371	0.00245001
TOLLIP	toll interacting protein	0.628618	0.00264044
ATP5PD	NA	-0.466567	0.00267379
GPI	glucose-6-phosphate isomerase	-0.274582	0.00275026
DAP3	death associated protein 3	-0.457247	0.00277315
AURKA	aurora kinase A	-1.311	0.00282158
CD1D	CD1d molecule	-1.01954	0.00297776
TRIM26	tripartite motif containing 26	0.889817	0.00303677
DUSP1	dual specificity phosphatase 1	1.1343	0.00307635
TCF7	transcription factor 7 (T-cell specific_ HMG-box)	-0.89532	0.00309375
TRBV7-2	T cell receptor beta variable 7-2	-0.710493	0.00317594
CD40LG	CD40 ligand	-2.50901	0.00320495
MTCP1	mature T-cell proliferation 1	2.07529	0.00324152
NDUFA4	NDUFA4_ mitochondrial complex associated	-0.535786	0.00322761
CHMP4A	charged multivesicular body protein 4A	-0.423052	0.00340681
CPT1B	carnitine palmitoyltransferase 1B (muscle)	2.14296	0.00366796
NDUFB9	NADH dehydrogenase (ubiquinone) 1 beta subcomplex_ 9_ 22kDa	-0.487652	0.00390491
IFIT1	interferon-induced protein with tetratricopeptide repeats 1	3.98299	0.00414373
IRF1	interferon regulatory factor 1	1.6746	0.00449866
UBE2F	ubiquitin-conjugating enzyme E2F (putative)	-0.704633	0.00453517
SMAD3	SMAD family member 3	-1.0177	0.00480584
MTOR	mechanistic target of rapamycin (serine/threonine kinase)	0.574084	0.00488411
PFKFB4	6-phosphofructo-2-kinase/fructose-2_6-biphosphatase 4	-2.41504	0.00506224
TERT	telomerase reverse transcriptase	-1.53051	0.00508448
IFI6	interferon_ alpha-inducible protein 6	2.47603	0.00540828
COX16	COX16 cytochrome c oxidase assembly homolog	-0.606024	0.00547829
JAK2	Janus kinase 2	1.68806	0.00576386
TFDP1	transcription factor Dp-1	-0.474194	0.0057782
RELA	v-rel avian reticuloendotheliosis viral oncogene homolog A	0.761213	0.00635407
MX1	MX dynamin-like GTPase 1	7.67215	0.00657689
OAS2	2'-5'-oligoadenylate synthetase 2_ 69/71kDa	3.05635	0.00672909
CTNNB1	catenin (cadherin-associated protein)_ beta 1_ 88kDa	-0.407557	0.00690423
ID2	inhibitor of DNA binding 2_ dominant negative helix-loop-helix protein	2.45943	0.00743316
IFNGR1	interferon gamma receptor 1	-1.22463	0.00752652
SMAD2	SMAD family member 2	-0.323915	0.00757703
COX7C	cytochrome c oxidase subunit VIIc	-0.736966	0.00783455
CXCR4	chemokine (C-X-C motif) receptor 4	-0.586263	0.00807689
NRF1	nuclear respiratory factor 1	-1.40718	0.00830903
SOCS4	suppressor of cytokine signaling 4	-0.495041	0.00855988
SOS2	son of sevenless homolog 2 (Drosophila)	-1.926	0.00850758
TGFBR1	transforming growth factor_ beta receptor 1	-0.715432	0.00856527
MYC	v-myc avian myelocytomatosis viral oncogene homolog	0.406291	0.00877877
RPL3	ribosomal protein L3	-0.420748	0.00888045
IFIT2	interferon-induced protein with tetratricopeptide repeats 2	1.57347	0.0089467
UBE2V1	ubiquitin-conjugating enzyme E2 variant 1	-0.278884	0.00924026
MAP3K14	mitogen-activated protein kinase kinase kinase 14	1.16559	0.00946706
SDHB	succinate dehydrogenase complex_ subunit B_ iron sulfur (Ip)	-0.398831	0.00958785
ALDH3A2	aldehyde dehydrogenase 3 family_ member A2	-0.902074	0.0102184
APC	adenomatous polyposis coli	-1.19255	0.0104964
CX3CR1	chemokine (C-X3-C motif) receptor 1	1.7425	0.0105416
TGFB1	transforming growth factor_ beta 1	-0.376076	0.0107122
PPP2R5D	protein phosphatase 2_ regulatory subunit B'_ delta	-0.353796	0.0109888
CD247	CD247 molecule	-0.87564	0.0110971
NEK2	NIMA-related kinase 2	-0.642237	0.011994
HADHB	hydroxyacyl-CoA dehydrogenase/3-ketoacyl-CoA thiolase/enoyl-CoA hydratase (trifunctional protein)_ beta subunit	-0.620548	0.012575
SLAMF6	SLAM family member 6	-1.16665	0.0125728
TSC2	tuberous sclerosis 2	0.538569	0.0126749
PTK2B	protein tyrosine kinase 2 beta	0.662642	0.0133067
PFKP	phosphofructokinase_ platelet	-0.412939	0.0140702
RARG	retinoic acid receptor_ gamma	-1.62493	0.0141941
FKBP1A	FK506 binding protein 1A_ 12kDa	-1.63306	0.0145664
TIMM23	translocase of inner mitochondrial membrane 23 homolog (yeast)	-0.450587	0.0153651
PYCR1	pyrroline-5-carboxylate reductase 1	0.335089	0.0157128
CCR8	chemokine (C-C motif) receptor 8	-2.73697	0.0158533
PARP1	poly (ADP-ribose) polymerase 1	-0.357113	0.0163977
NCAPG2	non-SMC condensin II complex_ subunit G2	-0.587588	0.0166019
TOMM6	translocase of outer mitochondrial membrane 6 homolog (yeast)	-0.495077	0.0170681
SGO2	shugoshin-like 2 (S. pombe)	-0.414369	0.0212394
CXCL3	chemokine (C-X-C motif) ligand 3	-1.23133	0.022256
NDUFA2	NADH dehydrogenase (ubiquinone) 1 alpha subcomplex_ 2_ 8kDa	-0.857706	0.0225613
TRIM33	tripartite motif containing 33	-0.319963	0.0240144
LCK	LCK proto-oncogene_ Src family tyrosine kinase	-0.369692	0.0245115
MTHFD1	methylenetetrahydrofolate dehydrogenase (NADP+ dependent) 1_ methenyltetrahydrofolate cyclohydrolase_ formyltetrahydrofolate synthetase	-0.324014	0.0249677
SERINC1	serine incorporator 1	-0.405256	0.0280447
TRAF3	TNF receptor-associated factor 3	-0.374396	0.0293864
CTSW	cathepsin W	-1.03103	0.0297022
NOTCH2	notch 2	-0.967334	0.031876
NCAPD2	non-SMC condensin I complex_ subunit D2	-0.407033	0.0338343
BATF3	basic leucine zipper transcription factor_ ATF-like 3	-0.736966	0.0340196
CBR4	carbonyl reductase 4	-0.76069	0.0346797
TRBV7-8	T cell receptor beta variable 7-8	-1.33342	0.0355478
NSD2	Wolf-Hirschhorn syndrome candidate 1	-0.587654	0.0365564
TOX	thymocyte selection-associated high mobility group box	-0.396129	0.0367738
CTNNA1	catenin (cadherin-associated protein)_ alpha 1_ 102kDa	-0.869069	0.0373989
IDH3A	isocitrate dehydrogenase 3 (NAD+) alpha	-0.259263	0.0375294
ADD1	adducin 1 (alpha)	-0.485772	0.0378722
MCAT	malonyl CoA:ACP acyltransferase (mitochondrial)	1.22781	0.0392599
GNAI2	guanine nucleotide binding protein (G protein)_ alpha inhibiting activity polypeptide 2	-0.527358	0.0465851
PLCG1	phospholipase C_ gamma 1	-0.352146	0.0468643
PRF1	perforin 1 (pore forming protein)	1.16993	0.0472302
PTGER4	prostaglandin E receptor 4 (subtype EP4)	0.546404	0.0472805
PCK2	phosphoenolpyruvate carboxykinase 2 (mitochondrial)	1.54432	0.0484186
ATP5MG	NA	-0.586372	0.0508952
CASP3	caspase 3_ apoptosis-related cysteine peptidase	-0.416965	0.0511821
DIABLO	diablo_ IAP-binding mitochondrial protein	-0.38425	0.0506092
GRK2	adrenergic_ beta_ receptor kinase 1	-0.414664	0.0513321
NKG7	natural killer cell granule protein 7	0.760812	0.0514291
GATA3	GATA binding protein 3	-0.404596	0.0522117
MAPK12	mitogen-activated protein kinase 12	0.830075	0.0541714
FASN	fatty acid synthase	-0.372987	0.0549337
ACTN1	actinin_ alpha 1	-0.752479	0.0557822
TRAF5	TNF receptor-associated factor 5	-0.546634	0.0556602
ARAF	A-Raf proto-oncogene_ serine/threonine kinase	1.20811	0.0578941
SHMT1	serine hydroxymethyltransferase 1 (soluble)	-0.242109	0.058402
OXSM	3-oxoacyl-ACP synthase_ mitochondrial	-0.485427	0.0605413
SLC7A5	solute carrier family 7 (amino acid transporter light chain_ L system)_ member 5	0.287469	0.0628413
WDR45	WD repeat domain 45	-1.05247	0.0635817
LEF1	lymphoid enhancer-binding factor 1	-0.293799	0.0656292
CPT1A	carnitine palmitoyltransferase 1A (liver)	0.731183	0.0676551
IL7R	interleukin 7 receptor	-0.76033	0.068454
NFAT5	nuclear factor of activated T-cells 5_ tonicity-responsive	1	0.0680549
TFB2M	transcription factor B2_ mitochondrial	-0.377832	0.0685664
TAOK2	TAO kinase 2	0.862496	0.0692424
KLRG1	killer cell lectin-like receptor subfamily G_ member 1	1.16439	0.0739179
SCD	stearoyl-CoA desaturase (delta-9-desaturase)	-0.54349	0.0734679
SERINC3	serine incorporator 3	-0.27698	0.0733035
SLC2A11	solute carrier family 2 (facilitated glucose transporter)_ member 11	0.65729	0.0736652
AKT2	v-akt murine thymoma viral oncogene homolog 2	-0.228892	0.0770322
CD9	CD9 molecule	-1.22574	0.0784975
TFAM	transcription factor A_ mitochondrial	-0.359685	0.0791118
KYAT1	NA	-1.26303	0.0835289
BATF	basic leucine zipper transcription factor_ ATF-like	1.1375	0.0855111
ADAR	adenosine deaminase_ RNA-specific	1.63614	0.0862044
NFKB2	nuclear factor of kappa light polypeptide gene enhancer in B-cells 2 (p49/p100)	0.807355	0.0863781
DECR1	2_4-dienoyl CoA reductase 1_ mitochondrial	-0.50758	0.0888151
UBE2I	ubiquitin-conjugating enzyme E2I	-0.320432	0.0897218
TRBV13	T cell receptor beta variable 13	-1.5025	0.0909718
STK11	serine/threonine kinase 11	-0.542318	0.0963642
AFDN	acrofacial dysostosis 1_ Nager type	1.58496	0.102732
GZMA	granzyme A (granzyme 1_ cytotoxic T-lymphocyte-associated serine esterase 3)	0.871102	0.102994
MT2A	metallothionein 2A	0.426719	0.102626
CXCR3	chemokine (C-X-C motif) receptor 3	-1.58496	0.105145
PDHA1	pyruvate dehydrogenase (lipoamide) alpha 1	-0.60464	0.106165
CMIP	c-Maf inducing protein	0.878009	0.11275
ACAD10	acyl-CoA dehydrogenase family_ member 10	-0.63743	0.113362
NCAPH	non-SMC condensin I complex_ subunit H	-0.338219	0.118618
RORC	RAR-related orphan receptor C	-0.847997	0.119085
CD4	CD4 molecule	1.4361	0.1241
PRICKLE3	prickle homolog 3	0.825971	0.126451
MAP3K7	mitogen-activated protein kinase kinase kinase 7	-0.320233	0.129797
TP53	tumor protein p53	0.886343	0.129537
PRKCD	protein kinase C_ delta	-0.784271	0.137017
GFER	growth factor_ augmenter of liver regeneration	0.494109	0.138181
STAT6	signal transducer and activator of transcription 6_ interleukin-4 induced	0.286157	0.144385
WAS	Wiskott-Aldrich syndrome	-0.348804	0.143988
TRIM25	tripartite motif containing 25	0.517723	0.150915
PTCD1	pentatricopeptide repeat domain 1	0.838719	0.155152
PFKL	phosphofructokinase_ liver	-0.430197	0.15877
RAE1	ribonucleic acid export 1	-0.186928	0.164993
IFNAR1	interferon (alpha_ beta and omega) receptor 1	-0.250076	0.167016
FNIP1	folliculin interacting protein 1	-0.532014	0.168177
IL23A	interleukin 23_ alpha subunit p19	-0.975083	0.167632
ALDOC	aldolase C_ fructose-bisphosphate	-1.1304	0.178072
LAT	linker for activation of T cells	0.218079	0.180103
RUNX3	runt-related transcription factor 3	0.526069	0.18414
BLK	BLK proto-oncogene_ Src family tyrosine kinase	0.489038	0.185682
PTPRC	protein tyrosine phosphatase_ receptor type_ C	0.34224	0.18657
BUB1	BUB1 mitotic checkpoint serine/threonine kinase	-0.267745	0.187238
OMA1	OMA1 zinc metallopeptidase	0.228465	0.195619
RAC2	ras-related C3 botulinum toxin substrate 2 (rho family_ small GTP binding protein Rac2)	-0.62849	0.195917
PSMB10	proteasome subunit beta 10	0.522678	0.203578
BCL2L1	BCL2-like 1	-0.461981	0.206273
LAMP1	lysosomal-associated membrane protein 1	0.25849	0.21237
SRC	SRC proto-oncogene_ non-receptor tyrosine kinase	0.472936	0.220899
RDH10	retinol dehydrogenase 10 (all-trans)	-1.05399	0.226098
NOTCH1	notch 1	-0.368306	0.231096
SMURF1	SMAD specific E3 ubiquitin protein ligase 1	0.847997	0.239493
DHRS4	dehydrogenase/reductase (SDR family) member 4	-0.254814	0.24502
RAG2	recombination activating gene 2	-0.367904	0.24543
HDAC8	histone deacetylase 8	-0.258312	0.254768
IKZF2	IKAROS family zinc finger 2 (Helios)	-0.223497	0.258475
IL6ST	interleukin 6 signal transducer	-0.598637	0.261544
NR3C1	nuclear receptor subfamily 3_ group C_ member 1 (glucocorticoid receptor)	0.271302	0.269228
HK2	hexokinase 2	0.285818	0.270959
TRBV28	T cell receptor beta variable 28	-0.537266	0.276446
IL10RA	interleukin 10 receptor_ alpha	0.906891	0.28184
STAT2	signal transducer and activator of transcription 2_ 113kDa	0.830075	0.283078
SMARCA4	SWI/SNF related_ matrix associated_ actin dependent regulator of chromatin_ subfamily a_ member 4	-0.0985007	0.286641
NPRL3	NPR3-like_ GATOR1 complex subunit	-0.334069	0.296294
TRAC	T cell receptor alpha constant	0.383436	0.2994
MR1	major histocompatibility complex_ class I-related	0.685891	0.31016
CD6	CD6 molecule	0.29956	0.334056
IFI30	interferon_ gamma-inducible protein 30	0.296617	0.33511
LAMP2	lysosomal-associated membrane protein 2	-0.150143	0.345385
SH3BP2	SH3-domain binding protein 2	-0.403356	0.346584
MTHFD2	methylenetetrahydrofolate dehydrogenase (NADP+ dependent) 2_ methenyltetrahydrofolate cyclohydrolase	-0.436285	0.36073
IL18BP	interleukin 18 binding protein	-0.523562	0.361927
MTHFD1L	methylenetetrahydrofolate dehydrogenase (NADP+ dependent) 1-like	0.139125	0.363024
LPAR6	lysophosphatidic acid receptor 6	-1	0.3698
TGFBR2	transforming growth factor_ beta receptor II (70/80kDa)	-0.23816	0.376607
ZBTB16	zinc finger and BTB domain containing 16	-0.503081	0.380338
MID1IP1	MID1 interacting protein 1	-0.242005	0.393271
IGF1R	insulin-like growth factor 1 receptor	-0.375509	0.400697
TPR	translocated promoter region_ nuclear basket protein	0.317029	0.399582
TNFSF9	tumor necrosis factor (ligand) superfamily_ member 9	-0.547488	0.405747
HLA-E	major histocompatibility complex_ class I_ E	0.342392	0.4114
MTHFS	5_10-methenyltetrahydrofolate synthetase (5-formyltetrahydrofolate cyclo-ligase)	0.138825	0.413127
STAM	signal transducing adaptor molecule (SH3 domain and ITAM motif) 1	-0.402547	0.415498
TRBV7-3	T cell receptor beta variable 7-3	0.554589	0.427639
CD96	CD96 molecule	0.216037	0.429656
CREB1	cAMP responsive element binding protein 1	0.136539	0.451935
NFATC1	nuclear factor of activated T-cells_ cytoplasmic_ calcineurin-dependent 1	-0.257798	0.457241
ATG7	autophagy related 7	0.16601	0.463596
BTBD6	BTB (POZ) domain containing 6	-0.328623	0.465257
MAP2K7	mitogen-activated protein kinase kinase 7	-0.18737	0.467408
GARS	glycyl-tRNA synthetase	0.171903	0.485327
CD7	CD7 molecule	-0.232043	0.487056
SLC25A20	solute carrier family 25 (carnitine/acylcarnitine translocase)_ member 20	-0.23816	0.49828
FAS	Fas cell surface death receptor	0.141962	0.50023
TRAV16	T cell receptor alpha variable 16	0.514573	0.506088
CHMP3	charged multivesicular body protein 3	-0.113822	0.523495
TRGV8	T cell receptor gamma variable 8	-0.341037	0.527993
TNFRSF10B	tumor necrosis factor receptor superfamily_ member 10b	0.321928	0.53732
PIK3R1	phosphoinositide-3-kinase_ regulatory subunit 1 (alpha)	0.135706	0.544832
TRAT1	T cell receptor associated transmembrane adaptor 1	-0.261807	0.547587
SIK1	salt-inducible kinase 1	-0.584963	0.551015
IRF8	interferon regulatory factor 8	0.378512	0.55598
PTPN6	protein tyrosine phosphatase_ non-receptor type 6	-0.117544	0.593025
COX19	COX19 cytochrome c oxidase assembly factor	0.283793	0.598358
DVL2	dishevelled segment polarity protein 2	-0.130532	0.59771
CD38	CD38 molecule	0.447459	0.613621
MKI67	marker of proliferation Ki-67	-0.0843457	0.6213
CD45R0	NA	0.225745	0.631457
GLS	glutaminase	-0.0627785	0.63334
MFN2	mitofusin 2	-0.10497	0.636449
PHGDH	phosphoglycerate dehydrogenase	0.208317	0.668766
HSPA9	heat shock 70kDa protein 9 (mortalin)	0.0795749	0.684689
SHMT2	serine hydroxymethyltransferase 2 (mitochondrial)	-0.111933	0.682863
OPA1	optic atrophy 1 (autosomal dominant)	0.0617243	0.68686
FYN	FYN proto-oncogene_ Src family tyrosine kinase	0.071232	0.692145
RDH14	retinol dehydrogenase 14 (all-trans/9-cis/11-cis)	-0.159657	0.708131
ERAP2	endoplasmic reticulum aminopeptidase 2	0.102934	0.71672
IL36A	interleukin 36_ alpha	-0.231326	0.715549
RORA	RAR-related orphan receptor A	0.19592	0.715777
PCCA	propionyl CoA carboxylase_ alpha polypeptide	-0.169925	0.720162
CALM1	calmodulin 1 (phosphorylase kinase_ delta)	0.108934	0.725379
TRAV8-2	T cell receptor alpha variable 8-2	-0.0707424	0.749407
VSIR	NA	0.241008	0.747846
BID	BH3 interacting domain death agonist	-0.0805237	0.752719
STAT5B	signal transducer and activator of transcription 5B	0.103241	0.763854
LAIR1	leukocyte-associated immunoglobulin-like receptor 1	-0.0714624	0.785153
TKT	transketolase	-0.0399539	0.784695
TRGV3/5	NA	-0.13493	0.795046
IKBKE	inhibitor of kappa light polypeptide gene enhancer in B-cells_ kinase epsilon	0.0536365	0.798848
FLCN	folliculin	-0.108934	0.812957
NMT1	N-myristoyltransferase 1	0.0444488	0.817869
SERPINB9	serpin peptidase inhibitor_ clade B (ovalbumin)_ member 9	-0.152003	0.819493
ACACA	acetyl-CoA carboxylase alpha	0.16665	0.825258
PSAT1	phosphoserine aminotransferase 1	0.122619	0.826039
GRPEL1	GrpE-like 1_ mitochondrial (E. coli)	-0.0718503	0.832433
HIF1A	hypoxia inducible factor 1_ alpha subunit (basic helix-loop-helix transcription factor)	-0.0383039	0.829708
ITGB2	integrin_ beta 2 (complement component 3 receptor 3 and 4 subunit)	0.0588937	0.831079
PDK1	pyruvate dehydrogenase kinase_ isozyme 1	0.0897302	0.852565
GOT1	glutamic-oxaloacetic transaminase 1_ soluble	0.0644887	0.863685
ACSF2	acyl-CoA synthetase family member 2	-0.106915	0.873397
DOCK2	dedicator of cytokinesis 2	0.0235944	0.872439
CCR4	chemokine (C-C motif) receptor 4	-0.104337	0.882264
MAX	MYC associated factor X	0.020643	0.880586
NFATC2IP	nuclear factor of activated T-cells_ cytoplasmic_ calcineurin-dependent 2 interacting protein	0.0345511	0.897337
STAT3	signal transducer and activator of transcription 3 (acute-phase response factor)	-0.0288137	0.911676
PRKAB2	protein kinase_ AMP-activated_ beta 2 non-catalytic subunit	0.0588937	0.915881
NFIL3	nuclear factor_ interleukin 3 regulated	0.0247467	0.922291
SOCS2	suppressor of cytokine signaling 2	0.0703893	0.922795
LAMTOR1	late endosomal/lysosomal adaptor_ MAPK and MTOR activator 1	0.0214797	0.929872
CD84	CD84 molecule	0.0135891	0.945683
ZAP70	zeta-chain (TCR) associated protein kinase 70kDa	0.00519818	0.960628
TGIF2	TGFB-induced factor homeobox 2	-0.0161197	0.971386
CTSD	cathepsin D	-7.77676e-16	1
ACOT2	acyl-CoA thioesterase 2	0	1
ACSL5	acyl-CoA synthetase long-chain family member 5	0	1
ACVR1C	activin A receptor_ type IC	0	1
ACVR2A	activin A receptor_ type IIA	0	1
ADAR1 P110 ISOFORM	NA	0	1
ADAR1 P150 ISOFORM	NA	0	1
ADAR2	adenosine deaminase_ RNA-specific_ B1	0	1
AHR	aryl hydrocarbon receptor	0	1
ALDH1L1	aldehyde dehydrogenase 1 family_ member L1	0	1
ALDH1L2	aldehyde dehydrogenase 1 family_ member L2	0	1
ALDH8A1	aldehyde dehydrogenase 8 family_ member A1	0	1
ANGPT2	angiopoietin 2	0	1
APOBEC3B	apolipoprotein B mRNA editing enzyme_ catalytic polypeptide-like 3B	0	1
APOBEC3G	apolipoprotein B mRNA editing enzyme_ catalytic polypeptide-like 3G	0	1
AREG	amphiregulin	0	1
B3GAT1	beta-1_3-glucuronyltransferase 1	0	1
C3	complement component 3	0	1
CARD10	caspase recruitment domain family_ member 10	0	1
CCL1	chemokine (C-C motif) ligand 1	0	1
CCL11	chemokine (C-C motif) ligand 11	0	1
CCL13	chemokine (C-C motif) ligand 13	0	1
CCL14	chemokine (C-C motif) ligand 14	0	1
CCL15	chemokine (C-C motif) ligand 15	0	1
CCL16	chemokine (C-C motif) ligand 16	0	1
CCL17	chemokine (C-C motif) ligand 17	0	1
CCL18	chemokine (C-C motif) ligand 18 (pulmonary and activation-regulated)	0	1
CCL19	chemokine (C-C motif) ligand 19	0	1
CCL2	chemokine (C-C motif) ligand 2	0	1
CCL20	chemokine (C-C motif) ligand 20	0	1
CCL21	chemokine (C-C motif) ligand 21	0	1
CCL22	chemokine (C-C motif) ligand 22	0	1
CCL23	chemokine (C-C motif) ligand 23	0	1
CCL24	chemokine (C-C motif) ligand 24	0	1
CCL25	chemokine (C-C motif) ligand 25	0	1
CCL26	chemokine (C-C motif) ligand 26	0	1
CCL27	chemokine (C-C motif) ligand 27	0	1
CCL28	chemokine (C-C motif) ligand 28	0	1
CCL3/L1	NA	0	1
CCL4/L1	NA	0	1
CCL5	chemokine (C-C motif) ligand 5	0	1
CCL7	chemokine (C-C motif) ligand 7	0	1
CCL8	chemokine (C-C motif) ligand 8	0	1
CCR2	chemokine (C-C motif) receptor 2	0	1
CCR5	chemokine (C-C motif) receptor 5 (gene/pseudogene)	0	1
CCR6	chemokine (C-C motif) receptor 6	0	1
CCR7	chemokine (C-C motif) receptor 7	0	1
CD14	CD14 molecule	0	1
CD160	CD160 molecule	0	1
CD163	CD163 molecule	0	1
CD19	CD19 molecule	0	1
CD200	CD200 molecule	0	1
CD209	CD209 molecule	0	1
CD22	CD22 molecule	0	1
CD244	CD244 molecule_ natural killer cell receptor 2B4	0	1
CD27	CD27 molecule	0	1
CD274	CD274 molecule	0	1
CD276	CD276 molecule	0	1
CD300C	CD300c molecule	0	1
CD300E	CD300e molecule	0	1
CD300LF	CD300 molecule-like family member f	0	1
CD33	CD33 molecule	0	1
CD40	CD40 molecule_ TNF receptor superfamily member 5	0	1
CD68	CD68 molecule	0	1
CD80	CD80 molecule	0	1
CD86	CD86 molecule	0	1
CD8A	CD8a molecule	0	1
CD8B	CD8b molecule	0	1
CEACAM1	carcinoembryonic antigen-related cell adhesion molecule 1 (biliary glycoprotein)	0	1
CEACAM3	carcinoembryonic antigen-related cell adhesion molecule 3	0	1
CIITA	class II_ major histocompatibility complex_ transactivator	0	1
CISH	cytokine inducible SH2-containing protein	0	1
CLCF1	cardiotrophin-like cytokine factor 1	0	1
CLDN1	claudin 1	0	1
CLDN23	claudin 23	0	1
CLDN3	claudin 3	0	1
CLDN4	claudin 4	0	1
CLDN7	claudin 7	0	1
CMKLR1	chemerin chemokine-like receptor 1	0	1
COLEC12	collectin sub-family member 12	0	1
CPA3	carboxypeptidase A3 (mast cell)	0	1
CRLF2	cytokine receptor-like factor 2	0	1
CSF2	colony stimulating factor 2 (granulocyte-macrophage)	0	1
CSF2RA	colony stimulating factor 2 receptor_ alpha_ low-affinity (granulocyte-macrophage)	0	1
CSF3	colony stimulating factor 3 (granulocyte)	0	1
CSF3R	colony stimulating factor 3 receptor (granulocyte)	0	1
CTLA4	cytotoxic T-lymphocyte-associated protein 4	0	1
CTNND1	catenin (cadherin-associated protein)_ delta 1	0	1
CTSS	cathepsin S	0	1
CX3CL1	chemokine (C-X3-C motif) ligand 1	0	1
CXCL1	chemokine (C-X-C motif) ligand 1 (melanoma growth stimulating activity_ alpha)	0	1
CXCL10	chemokine (C-X-C motif) ligand 10	0	1
CXCL11	chemokine (C-X-C motif) ligand 11	0	1
CXCL12	chemokine (C-X-C motif) ligand 12	0	1
CXCL13	chemokine (C-X-C motif) ligand 13	0	1
CXCL14	chemokine (C-X-C motif) ligand 14	0	1
CXCL16	chemokine (C-X-C motif) ligand 16	0	1
CXCL2	chemokine (C-X-C motif) ligand 2	0	1
CXCL5	chemokine (C-X-C motif) ligand 5	0	1
CXCL6	chemokine (C-X-C motif) ligand 6	0	1
CXCL8	chemokine (C-X-C motif) ligand 8	0	1
CXCL9	chemokine (C-X-C motif) ligand 9	0	1
CXCR5	chemokine (C-X-C motif) receptor 5	0	1
CXCR6	chemokine (C-X-C motif) receptor 6	0	1
CYBB	cytochrome b-245_ beta polypeptide	0	1
DDX17	DEAD (Asp-Glu-Ala-Asp) box helicase 17	0	1
DDX5	DEAD (Asp-Glu-Ala-Asp) box helicase 5	0	1
DDX58 (RIG-I)	NA	0	1
DHX9	DEAH (Asp-Glu-Ala-His) box helicase 9	0	1
DLL1	delta-like 1 (Drosophila)	0	1
EBI3	Epstein-Barr virus induced 3	0	1
EGF	epidermal growth factor	0	1
EGR1	early growth response 1	0	1
ENTPD1	ectonucleoside triphosphate diphosphohydrolase 1	0	1
ENTPD2	ectonucleoside triphosphate diphosphohydrolase 2	0	1
EOMES	eomesodermin	0	1
FASLG	Fas ligand (TNF superfamily_ member 6)	0	1
FCAR	Fc fragment of IgA receptor	0	1
FCGR3A/B	NA	0	1
FCRL2	Fc receptor-like 2	0	1
FOS	FBJ murine osteosarcoma viral oncogene homolog	0	1
FOSB	FBJ murine osteosarcoma viral oncogene homolog B	0	1
FOXO1	forkhead box O1	0	1
FOXP3	forkhead box P3	0	1
FPR1	formyl peptide receptor 1	0	1
GLI1	GLI family zinc finger 1	0	1
GLS2	glutaminase 2 (liver_ mitochondrial)	0	1
GNLY	granulysin	0	1
GZMB	granzyme B (granzyme 2_ cytotoxic T-lymphocyte-associated serine esterase 1)	0	1
GZMH	granzyme H (cathepsin G-like 2_ protein h-CCPX)	0	1
GZMK	granzyme K (granzyme 3; tryptase II)	0	1
GZMM	granzyme M (lymphocyte met-ase 1)	0	1
HACD4	3-hydroxyacyl-CoA dehydratase 4	0	1
HAVCR2	hepatitis A virus cellular receptor 2	0	1
HDC	histidine decarboxylase	0	1
HK3	kallikrein-related peptidase 3	0	1
HLA-DQA1	major histocompatibility complex_ class II_ DQ alpha 1	0	1
HLA-DRA	major histocompatibility complex_ class II_ DR alpha	0	1
HLA-DRB1	major histocompatibility complex_ class II_ DR beta 1	0	1
HSD11B1	hydroxysteroid (11-beta) dehydrogenase 1	0	1
ICAM1	intercellular adhesion molecule 1	0	1
ICOS	inducible T-cell co-stimulator	0	1
ICOSLG	inducible T-cell co-stimulator ligand	0	1
IDO1	indoleamine 2_3-dioxygenase 1	0	1
IDO2	indoleamine 2_3-dioxygenase 2	0	1
IFIH1 (MDA5)	NA	0	1
IFITM3	interferon induced transmembrane protein 3	0	1
IFNA1	interferon_ alpha 1	0	1
IFNB1	interferon_ beta 1_ fibroblast	0	1
IFNG	interferon_ gamma	0	1
IKZF4	IKAROS family zinc finger 4 (Eos)	0	1
IL10	interleukin 10	0	1
IL11	interleukin 11	0	1
IL12A	interleukin 12A	0	1
IL12B	interleukin 12B	0	1
IL12RB1	interleukin 12 receptor_ beta 1	0	1
IL12RB2	interleukin 12 receptor_ beta 2	0	1
IL13	interleukin 13	0	1
IL17A	interleukin 17A	0	1
IL17C	interleukin 17C	0	1
IL17F	interleukin 17F	0	1
IL18	interleukin 18	0	1
IL19	interleukin 19	0	1
IL1A	interleukin 1_ alpha	0	1
IL1B	interleukin 1_ beta	0	1
IL1F10	interleukin 1 family_ member 10 (theta)	0	1
IL1R1	interleukin 1 receptor_ type I	0	1
IL1RN	interleukin 1 receptor antagonist	0	1
IL2	interleukin 2	0	1
IL20	interleukin 20	0	1
IL21	interleukin 21	0	1
IL21R	interleukin 21 receptor	0	1
IL22	interleukin 22	0	1
IL23R	interleukin 23 receptor	0	1
IL24	interleukin 24	0	1
IL25	interleukin 25	0	1
IL26	interleukin 26	0	1
IL27	interleukin 27	0	1
IL2RA	interleukin 2 receptor_ alpha	0	1
IL2RB	interleukin 2 receptor_ beta	0	1
IL3	interleukin 3	0	1
IL31	interleukin 31	0	1
IL33	interleukin 33	0	1
IL36B	interleukin 36_ beta	0	1
IL36G	interleukin 36_ gamma	0	1
IL36RN	interleukin 36 receptor antagonist	0	1
IL37	interleukin 37	0	1
IL3RA	interleukin 3 receptor_ alpha (low affinity)	0	1
IL4	interleukin 4	0	1
IL4R	interleukin 4 receptor	0	1
IL5	interleukin 5	0	1
IL6	interleukin 6	0	1
IL6R	interleukin 6 receptor	0	1
IL7	interleukin 7	0	1
IL9	interleukin 9	0	1
IRF4	interferon regulatory factor 4	0	1
IRF5	interferon regulatory factor 5	0	1
IRF6	interferon regulatory factor 6	0	1
ITGAM	integrin_ alpha M (complement component 3 receptor 3 subunit)	0	1
JAG1	jagged 1	0	1
KIR3DL1/2	NA	0	1
KLRB1	killer cell lectin-like receptor subfamily B_ member 1	0	1
KLRC1/2	NA	0	1
KLRD1	killer cell lectin-like receptor subfamily D_ member 1	0	1
KLRF1	killer cell lectin-like receptor subfamily F_ member 1	0	1
KLRK1	killer cell lectin-like receptor subfamily K_ member 1	0	1
LAG3	lymphocyte-activation gene 3	0	1
LDHC	lactate dehydrogenase C	0	1
LEFTY1	left-right determination factor 1	0	1
LIF	leukemia inhibitory factor	0	1
LILRA1	leukocyte immunoglobulin-like receptor_ subfamily A (with TM domain)_ member 1	0	1
LILRA5	leukocyte immunoglobulin-like receptor_ subfamily A (with TM domain)_ member 5	0	1
LILRB2	leukocyte immunoglobulin-like receptor_ subfamily B (with TM and ITIM domains)_ member 2	0	1
LILRB3	leukocyte immunoglobulin-like receptor_ subfamily B (with TM and ITIM domains)_ member 3	0	1
LILRB4	leukocyte immunoglobulin-like receptor_ subfamily B (with TM and ITIM domains)_ member 4	0	1
LIN28A	lin-28 homolog A (C. elegans)	0	1
LIN28B	lin-28 homolog B (C. elegans)	0	1
LNX1	ligand of numb-protein X 1_ E3 ubiquitin protein ligase	0	1
LTA	lymphotoxin alpha	0	1
MAF	v-maf avian musculoaponeurotic fibrosarcoma oncogene homolog	0	1
MALAT1	metastasis associated lung adenocarcinoma transcript 1 (non-protein coding)	0	1
MAML2	mastermind-like transcriptional coactivator 2	0	1
MAML3	mastermind-like transcriptional coactivator 3	0	1
MAVS	mitochondrial antiviral signaling protein	0	1
MDFIC	MyoD family inhibitor domain containing	0	1
METTL14	methyltransferase like 14	0	1
METTL3	methyltransferase like 3	0	1
MINOS1	mitochondrial inner membrane organizing system 1	0	1
MMP2	matrix metallopeptidase 2	0	1
MMP9	matrix metallopeptidase 9	0	1
MS4A1	membrane-spanning 4-domains_ subfamily A_ member 1	0	1
MS4A2	membrane-spanning 4-domains_ subfamily A_ member 2	0	1
MS4A4A	membrane-spanning 4-domains_ subfamily A_ member 4A	0	1
MYL9	myosin_ light chain 9_ regulatory	0	1
NBL1	neuroblastoma 1_ DAN family BMP antagonist	0	1
NCAM1	neural cell adhesion molecule 1	0	1
NCR1	natural cytotoxicity triggering receptor 1	0	1
NCR2	natural cytotoxicity triggering receptor 2	0	1
NCR3	natural cytotoxicity triggering receptor 3	0	1
NEAT1	nuclear paraspeckle assembly transcript 1 (non-protein coding)	0	1
NOD2	nucleotide-binding oligomerization domain containing 2	0	1
NRL	neural retina leucine zipper	0	1
OASL	2'-5'-oligoadenylate synthetase-like	0	1
PDCD1	programmed cell death 1	0	1
PDCD1LG2	programmed cell death 1 ligand 2	0	1
PDGFRA	platelet-derived growth factor receptor_ alpha polypeptide	0	1
PDPN	podoplanin	0	1
PLA2G4B	phospholipase A2_ group IVB (cytosolic)	0	1
PLCB3	phospholipase C_ beta 3 (phosphatidylinositol-specific)	0	1
PNOC	prepronociceptin	0	1
PPARD	peroxisome proliferator-activated receptor delta	0	1
PPARGC1A	peroxisome proliferator-activated receptor gamma_ coactivator 1 alpha	0	1
PRDM1	PR domain containing 1_ with ZNF domain	0	1
PROCR	protein C receptor_ endothelial	0	1
PTGDR2	prostaglandin D2 receptor 2	0	1
PTGER2	prostaglandin E receptor 2 (subtype EP2)_ 53kDa	0	1
PTGS1	prostaglandin-endoperoxide synthase 1 (prostaglandin G/H synthase and cyclooxygenase)	0	1
PTGS2	prostaglandin-endoperoxide synthase 2 (prostaglandin G/H synthase and cyclooxygenase)	0	1
RARB	retinoic acid receptor_ beta	0	1
RDH5	retinol dehydrogenase 5 (11-cis/9-cis)	0	1
S100A12	S100 calcium binding protein A12	0	1
SELPLG	selectin P ligand	0	1
SERINC4	serine incorporator 4	0	1
SIGLEC5	sialic acid binding Ig-like lectin 5	0	1
SLAMF7	SLAM family member 7	0	1
SLC27A3	solute carrier family 27 (fatty acid transporter)_ member 3	0	1
SLC2A2	solute carrier family 2 (facilitated glucose transporter)_ member 2	0	1
SOX4	SRY (sex determining region Y)-box 4	0	1
SPIB	Spi-B transcription factor (Spi-1/PU.1 related)	0	1
STAT4	signal transducer and activator of transcription 4	0	1
TBX21	T-box 21	0	1
TCL1A	T-cell leukemia/lymphoma 1A	0	1
TIGIT	T cell immunoreceptor with Ig and ITIM domains	0	1
TIMP1	TIMP metallopeptidase inhibitor 1	0	1
TLR2	toll-like receptor 2	0	1
TLR4	toll-like receptor 4	0	1
TLR9	toll-like receptor 9	0	1
TNF	tumor necrosis factor	0	1
TNFRSF11A	tumor necrosis factor receptor superfamily_ member 11a_ NFKB activator	0	1
TNFRSF17	tumor necrosis factor receptor superfamily_ member 17	0	1
TNFRSF18	tumor necrosis factor receptor superfamily_ member 18	0	1
TNFRSF4	tumor necrosis factor receptor superfamily_ member 4	0	1
TNFRSF9	tumor necrosis factor receptor superfamily_ member 9	0	1
TNFSF13B	tumor necrosis factor (ligand) superfamily_ member 13b	0	1
TPSAB1/B2	NA	0	1
TRAV1-1	T cell receptor alpha variable 1-1	0	1
TRAV1-2	T cell receptor alpha variable 1-2	0	1
TRAV10	T cell receptor alpha variable 10	0	1
TRAV11	T cell receptor alpha variable 11 (pseudogene)	0	1
TRAV12-1	T cell receptor alpha variable 12-1	0	1
TRAV12-2	T cell receptor alpha variable 12-2	0	1
TRAV12-3	T cell receptor alpha variable 12-3	0	1
TRAV13-1	T cell receptor alpha variable 13-1	0	1
TRAV13-2	T cell receptor alpha variable 13-2	0	1
TRAV14	NA	0	1
TRAV2	T cell receptor alpha variable 2	0	1
TRAV20	T cell receptor alpha variable 20	0	1
TRAV21	T cell receptor alpha variable 21	0	1
TRAV22	T cell receptor alpha variable 22	0	1
TRAV23	NA	0	1
TRAV24	T cell receptor alpha variable 24	0	1
TRAV25	T cell receptor alpha variable 25	0	1
TRAV26-1	T cell receptor alpha variable 26-1	0	1
TRAV26-2	T cell receptor alpha variable 26-2	0	1
TRAV27	T cell receptor alpha variable 27	0	1
TRAV29	NA	0	1
TRAV3	T cell receptor alpha variable 3 (gene/pseudogene)	0	1
TRAV30	T cell receptor alpha variable 30	0	1
TRAV34	T cell receptor alpha variable 34	0	1
TRAV35	T cell receptor alpha variable 35	0	1
TRAV36	NA	0	1
TRAV38-1	T cell receptor alpha variable 38-1	0	1
TRAV38-2	NA	0	1
TRAV39	T cell receptor alpha variable 39	0	1
TRAV4	T cell receptor alpha variable 4	0	1
TRAV40	T cell receptor alpha variable 40	0	1
TRAV41	T cell receptor alpha variable 41	0	1
TRAV5	T cell receptor alpha variable 5	0	1
TRAV6	T cell receptor alpha variable 6	0	1
TRAV7	T cell receptor alpha variable 7	0	1
TRAV8-1	T cell receptor alpha variable 8-1	0	1
TRAV8-3	T cell receptor alpha variable 8-3	0	1
TRAV8-6	T cell receptor alpha variable 8-6	0	1
TRAV9-1	T cell receptor alpha variable 9-1	0	1
TRAV9-2	T cell receptor alpha variable 9-2	0	1
TRBV10-1	T cell receptor beta variable 10-1(gene/pseudogene)	0	1
TRBV10-2	T cell receptor beta variable 10-2	0	1
TRBV11-1	T cell receptor beta variable 11-1	0	1
TRBV11-2	T cell receptor beta variable 11-2	0	1
TRBV11-3	T cell receptor beta variable 11-3	0	1
TRBV12-5	T cell receptor beta variable 12-5	0	1
TRBV14	T cell receptor beta variable 14	0	1
TRBV15	T cell receptor beta variable 15	0	1
TRBV16	T cell receptor beta variable 16 (gene/pseudogene)	0	1
TRBV18	T cell receptor beta variable 18	0	1
TRBV19	T cell receptor beta variable 19	0	1
TRBV2	T cell receptor beta variable 2	0	1
TRBV20-1	T cell receptor beta variable 20-1	0	1
TRBV24-1	T cell receptor beta variable 24-1	0	1
TRBV25-1	T cell receptor beta variable 25-1	0	1
TRBV27	T cell receptor beta variable 27	0	1
TRBV29-1	T cell receptor beta variable 29-1	0	1
TRBV3-1	T cell receptor beta variable 3-1	0	1
TRBV30	T cell receptor beta variable 30 (gene/pseudogene)	0	1
TRBV4-1	T cell receptor beta variable 4-1	0	1
TRBV4-2	T cell receptor beta variable 4-2	0	1
TRBV4-3	T cell receptor beta variable 4-3	0	1
TRBV5-1	T cell receptor beta variable 5-1	0	1
TRBV5-4	T cell receptor beta variable 5-4	0	1
TRBV5-5	T cell receptor beta variable 5-5	0	1
TRBV5-6	T cell receptor beta variable 5-6	0	1
TRBV5-8	T cell receptor beta variable 5-8	0	1
TRBV6-1	T cell receptor beta variable 6-1	0	1
TRBV6-2	T cell receptor beta variable 6-2 (gene/pseudogene)	0	1
TRBV6-4	T cell receptor beta variable 6-4	0	1
TRBV6-5	T cell receptor beta variable 6-5	0	1
TRBV6-6	T cell receptor beta variable 6-6	0	1
TRBV6-8	T cell receptor beta variable 6-8	0	1
TRBV7-4	T cell receptor beta variable 7-4 (gene/pseudogene)	0	1
TRBV7-6	T cell receptor beta variable 7-6	0	1
TRBV7-7	T cell receptor beta variable 7-7	0	1
TRBV7-9	T cell receptor beta variable 7-9	0	1
TRBV9	T cell receptor beta variable 9	0	1
TRDC	T cell receptor delta constant	0	1
TRDV1	T cell receptor delta variable 1	0	1
TRDV2	T cell receptor delta variable 2	0	1
TRDV3	T cell receptor delta variable 3	0	1
TREM1	triggering receptor expressed on myeloid cells 1	0	1
TRGC1	T cell receptor gamma constant 1	0	1
TRGC2	T cell receptor gamma constant 2	0	1
TRGV2	T cell receptor gamma variable 2	0	1
TRGV4	T cell receptor gamma variable 4	0	1
TRGV9	T cell receptor gamma variable 9	0	1
TRIM10	tripartite motif containing 10	0	1
TRIM22	tripartite motif containing 22	0	1
TRIM31	tripartite motif containing 31	0	1
TYROBP	TYRO protein tyrosine kinase binding protein	0	1
XCL1/2	NA	0	1

## Sheet: E912A IFN vs E912A
Symbol	Description	log2FoldChange	pvalue
IFI6	interferon_ alpha-inducible protein 6	2.96963	0.000362895
TRIM25	tripartite motif containing 25	0.981354	0.000533661		total DE genes	27
IFIT1	interferon-induced protein with tetratricopeptide repeats 1	4.47249	0.000899657		up regulated	24
IFIT3	interferon-induced protein with tetratricopeptide repeats 3	5.8392	0.00202806		downregulated	3
ISG15	ISG15 ubiquitin-like modifier	2.78987	0.00217501
OAS1	2'-5'-oligoadenylate synthetase 1_ 40/46kDa	4.95936	0.0014672
STAT1	signal transducer and activator of transcription 1_ 91kDa	2.47156	0.00230981
USP18	ubiquitin specific peptidase 18	2.10962	0.00275628
IRF9	interferon regulatory factor 9	3.98255	0.00359314
OAS2	2'-5'-oligoadenylate synthetase 2_ 69/71kDa	3.22762	0.00359676
IFI35	interferon-induced protein 35	2.64386	0.00762999
MTHFD1L	methylenetetrahydrofolate dehydrogenase (NADP+ dependent) 1-like	0.362432	0.00727718
MX1	MX dynamin-like GTPase 1	7.71891	0.00613023
OAS3	2'-5'-oligoadenylate synthetase 3_ 100kDa	2.07635	0.00767359
SP100	SP100 nuclear antigen	1.44057	0.00630477
TRAV8-2	T cell receptor alpha variable 8-2	0.391479	0.0086783
MT2A	metallothionein 2A	0.51357	0.0105704
IFIT2	interferon-induced protein with tetratricopeptide repeats 2	1.4361	0.0124535
XAF1	XIAP associated factor 1	2.82018	0.0180222
NDUFA4	NDUFA4_ mitochondrial complex associated	-0.450026	0.0212182
FASN	fatty acid synthase	-0.434021	0.0229747
IRF7	interferon regulatory factor 7	3.36565	0.0247151
MYC	v-myc avian myelocytomatosis viral oncogene homolog	0.356439	0.024495
SLC7A5	solute carrier family 7 (amino acid transporter light chain_ L system)_ member 5	0.32868	0.0273779
LAT	linker for activation of T cells	0.355457	0.0285849
RAG2	recombination activating gene 2	-0.694292	0.0314776
SLC3A2	solute carrier family 3 (amino acid transporter heavy chain)_ member 2	0.558992	0.0465618
CD84	CD84 molecule	0.369495	0.0504233
PML	promyelocytic leukemia	0.701404	0.0536787
IDH3A	isocitrate dehydrogenase 3 (NAD+) alpha	0.329308	0.0560328
COX7C	cytochrome c oxidase subunit VIIc	-0.521921	0.0731607
JUN	jun proto-oncogene	2.98706	0.0736759
NEDD8	neural precursor cell expressed_ developmentally down-regulated 8	-0.335097	0.0708426
PFKL	phosphofructokinase_ liver	-0.541894	0.0734703
RPL3	ribosomal protein L3	-0.335117	0.0734005
COX7B	cytochrome c oxidase subunit VIIb	-0.569028	0.0863439
ACACA	acetyl-CoA carboxylase alpha	-0.36257	0.628066
ACAD10	acyl-CoA dehydrogenase family_ member 10	-0.231326	0.598387
ACADVL	acyl-CoA dehydrogenase_ very long chain	0.193955	0.570912
ACSF2	acyl-CoA synthetase family member 2	-0.839535	0.263116
ACTN1	actinin_ alpha 1	-0.390952	0.385141
ACVR1B	activin A receptor_ type IB	0.060754	0.915788
ADAR	adenosine deaminase_ RNA-specific	1.22517	0.201633
ADD1	adducin 1 (alpha)	-0.0529992	0.846817
ADORA2A	adenosine A2a receptor	1.20645	0.22536
AFDN	acrofacial dysostosis 1_ Nager type	0.906891	0.3176
AKT1	v-akt murine thymoma viral oncogene homolog 1	-0.1532	0.746947
AKT2	v-akt murine thymoma viral oncogene homolog 2	-0.00854444	0.943926
ALDH3A2	aldehyde dehydrogenase 3 family_ member A2	-0.198381	0.632394
ALDOA	aldolase A_ fructose-bisphosphate	-0.0891441	0.53025
ALDOC	aldolase C_ fructose-bisphosphate	-0.454566	0.599666
APC	adenomatous polyposis coli	-0.257798	0.456677
ARAF	A-Raf proto-oncogene_ serine/threonine kinase	0.175087	0.806948
ATG14	autophagy related 14	0.0285692	0.935987
ATG7	autophagy related 7	0.219169	0.346815
ATP5MF	NA	-0.308807	0.555675
ATP5MG	NA	-0.439564	0.176922
ATP5PD	NA	-0.245814	0.112003
ATP6V1F	ATPase_ H+ transporting_ lysosomal 14kDa_ V1 subunit F	-0.158076	0.693159
AURKA	aurora kinase A	-0.148735	0.779813
BATF	basic leucine zipper transcription factor_ ATF-like	0.214125	0.736451
BATF3	basic leucine zipper transcription factor_ ATF-like 3	-0.185692	0.626594
BCL2	B-cell CLL/lymphoma 2	-0.387023	0.53882
BID	BH3 interacting domain death agonist	0.369838	0.113124
BLK	BLK proto-oncogene_ Src family tyrosine kinase	0.540568	0.19752
BTBD6	BTB (POZ) domain containing 6	-0.0484985	0.921217
BUB1	BUB1 mitotic checkpoint serine/threonine kinase	-0.102152	0.654223
CALM1	calmodulin 1 (phosphorylase kinase_ delta)	0.0303736	0.920121
CASP3	caspase 3_ apoptosis-related cysteine peptidase	0.120217	0.608272
CASP8	caspase 8_ apoptosis-related cysteine peptidase	0.12	0.667926
CBR4	carbonyl reductase 4	-0.318909	0.465466
CCNC	cyclin C	-0.0459252	0.80401
CCR4	chemokine (C-C motif) receptor 4	0.453718	0.529448
CCR8	chemokine (C-C motif) receptor 8	-0.765535	0.399603
CD1A	CD1a molecule	-0.145562	0.657232
CD1D	CD1d molecule	-0.281326	0.518555
CD247	CD247 molecule	-0.0476405	0.914339
CD28	CD28 molecule	-0.196892	0.597973
CD38	CD38 molecule	-0.0524674	0.953293
CD3D	CD3d molecule_ delta (CD3-TCR complex)	-0.0844804	0.715589
CD3E	CD3e molecule_ epsilon (CD3-TCR complex)	0.0726537	0.600405
CD3G	CD3g molecule_ gamma (CD3-TCR complex)	0.139093	0.459919
CD4	CD4 molecule	-0.584963	0.49676
CD40LG	CD40 ligand	-0.0874628	0.9267
CD45R0	NA	0.391483	0.342774
CD45RA	NA	-0.234465	0.519535
CD6	CD6 molecule	0.0369942	0.921421
CD69	CD69 molecule	-0.610053	0.561028
CD7	CD7 molecule	0.146413	0.589501
CD9	CD9 molecule	-0.347923	0.593286
CD96	CD96 molecule	-0.0421695	0.864972
CD99	CD99 molecule	-0.282079	0.130002
CDC26	cell division cycle 26	0.0530664	0.777542
CDC42	cell division cycle 42	-0.27193	0.369346
CDKN1A	cyclin-dependent kinase inhibitor 1A (p21_ Cip1)	0.415037	0.734826
CHMP3	charged multivesicular body protein 3	0.242003	0.151439
CHMP4A	charged multivesicular body protein 4A	0.0825514	0.585287
CKAP5	cytoskeleton associated protein 5	-0.172432	0.697759
CMIP	c-Maf inducing protein	-0.405256	0.510437
COX16	COX16 cytochrome c oxidase assembly homolog	-0.133387	0.591311
COX19	COX19 cytochrome c oxidase assembly factor	-0.321928	0.569433
COX4I1	cytochrome c oxidase subunit IV isoform 1	-0.119556	0.505289
COX5B	cytochrome c oxidase subunit Vb	-0.193134	0.572494
COX6B1	cytochrome c oxidase subunit VIb polypeptide 1 (ubiquitous)	-0.219093	0.501899
COX6C	cytochrome c oxidase subunit VIc	-0.455679	0.120998
COX7A2	cytochrome c oxidase subunit VIIa polypeptide 2 (liver)	-0.521214	0.128373
CPT1A	carnitine palmitoyltransferase 1A (liver)	0.432111	0.31391
CPT1B	carnitine palmitoyltransferase 1B (muscle)	-0.0801703	0.909235
CREB1	cAMP responsive element binding protein 1	-0.0762425	0.681982
CS	citrate synthase	-0.0648374	0.757672
CTNNA1	catenin (cadherin-associated protein)_ alpha 1_ 102kDa	-0.404596	0.402331
CTNNB1	catenin (cadherin-associated protein)_ beta 1_ 88kDa	-0.0218467	0.898673
CTSD	cathepsin D	0.275973	0.30549
CTSW	cathepsin W	0.434403	0.370299
CX3CR1	chemokine (C-X3-C motif) receptor 1	-0.0565835	0.943515
CXCL3	chemokine (C-X-C motif) ligand 3	0.0972972	0.861413
CXCR3	chemokine (C-X-C motif) receptor 3	0.228269	0.682792
CXCR4	chemokine (C-X-C motif) receptor 4	0.0490457	0.868006
DAP3	death associated protein 3	0.0875346	0.646503
DDIT4	DNA-damage-inducible transcript 4	0.451379	0.367922
DECR1	2_4-dienoyl CoA reductase 1_ mitochondrial	-0.143078	0.68535
DGLUCY	NA	0.5603	0.194786
DHFR2	NA	0.196397	0.788493
DHRS4	dehydrogenase/reductase (SDR family) member 4	-0.0461418	0.843819
DIABLO	diablo_ IAP-binding mitochondrial protein	-0.119053	0.681612
DOCK2	dedicator of cytokinesis 2	-0.139858	0.353371
DUSP1	dual specificity phosphatase 1	0.268703	0.592478
DVL2	dishevelled segment polarity protein 2	-0.119299	0.653975
ERAP2	endoplasmic reticulum aminopeptidase 2	0.2456	0.35709
FAM30A	KIAA0125	-0.584963	0.259768
FAS	Fas cell surface death receptor	0.253739	0.195938
FH	fumarate hydratase	-0.125234	0.675863
FKBP1A	FK506 binding protein 1A_ 12kDa	-0.244618	0.859429
FLCN	folliculin	-0.025091	0.957331
FNIP1	folliculin interacting protein 1	-0.0931094	0.814511
FYN	FYN proto-oncogene_ Src family tyrosine kinase	0.0275244	0.867512
GADD45B	growth arrest and DNA-damage-inducible_ beta	1.87869	0.163947
GARS	glycyl-tRNA synthetase	0.288287	0.264782
GART	phosphoribosylglycinamide formyltransferase_ phosphoribosylglycinamide synthetase_ phosphoribosylaminoimidazole synthetase	0.0777552	0.732147
GATA3	GATA binding protein 3	-0.239383	0.366119
GFER	growth factor_ augmenter of liver regeneration	0.296982	0.39894
GFM1	G elongation factor_ mitochondrial 1	0.122656	0.697249
GLS	glutaminase	0.100884	0.460465
GLUD1/2	NA	-0.0413869	0.900445
GNG10	guanine nucleotide binding protein (G protein)_ gamma 10	0.0430687	0.946548
GOT1	glutamic-oxaloacetic transaminase 1_ soluble	-0.249359	0.496842
GPI	glucose-6-phosphate isomerase	-0.0924078	0.407162
GRK2	adrenergic_ beta_ receptor kinase 1	0.0162285	0.953861
GRK4	G protein-coupled receptor kinase 4	0.321928	0.689926
GRPEL1	GrpE-like 1_ mitochondrial (E. coli)	0.274059	0.366429
GZMA	granzyme A (granzyme 1_ cytotoxic T-lymphocyte-associated serine esterase 3)	0.492704	0.325008
HADHB	hydroxyacyl-CoA dehydrogenase/3-ketoacyl-CoA thiolase/enoyl-CoA hydratase (trifunctional protein)_ beta subunit	-0.307734	0.308804
HDAC7	histone deacetylase 7	0.590016	0.131029
HDAC8	histone deacetylase 8	-0.046921	0.852789
HIF1A	hypoxia inducible factor 1_ alpha subunit (basic helix-loop-helix transcription factor)	-0.0700688	0.681827
HK2	hexokinase 2	0.27432	0.30197
HLA-E	major histocompatibility complex_ class I_ E	0.715119	0.12096
HMGCR	3-hydroxy-3-methylglutaryl-CoA reductase	-0.295167	0.501596
HSPA9	heat shock 70kDa protein 9 (mortalin)	0.203045	0.335936
HSPE1	heat shock 10kDa protein 1	0.0436854	0.849079
ID2	inhibitor of DNA binding 2_ dominant negative helix-loop-helix protein	0.662965	0.492648
IFI30	interferon_ gamma-inducible protein 30	-0.126912	0.6783
IFNAR1	interferon (alpha_ beta and omega) receptor 1	0.171161	0.43312
IFNGR1	interferon gamma receptor 1	0.0369416	0.944247
IFNGR2	interferon gamma receptor 2 (interferon gamma transducer 1)	-0.343074	0.56617
IGF1R	insulin-like growth factor 1 receptor	-0.584963	0.192057
IKBKE	inhibitor of kappa light polypeptide gene enhancer in B-cells_ kinase epsilon	0.233876	0.207282
IKZF2	IKAROS family zinc finger 2 (Helios)	-0.220769	0.27275
IL10RA	interleukin 10 receptor_ alpha	0.530515	0.526245
IL15	interleukin 15	0.485427	0.692858
IL16	interleukin 16	0.68966	0.102993
IL18BP	interleukin 18 binding protein	0.304855	0.604729
IL23A	interleukin 23_ alpha subunit p19	0.289494	0.705623
IL2RG	interleukin 2 receptor_ gamma	0.0108133	0.905271
IL32	interleukin 32	-0.178666	0.278708
IL36A	interleukin 36_ alpha	-0.547488	0.482412
IL6ST	interleukin 6 signal transducer	0.138828	0.810865
IL7R	interleukin 7 receptor	-0.223721	0.598004
IRF1	interferon regulatory factor 1	0.496426	0.507365
IRF3	interferon regulatory factor 3	0.118644	0.797816
IRF8	interferon regulatory factor 8	0.321928	0.585101
ITGB2	integrin_ beta 2 (complement component 3 receptor 3 and 4 subunit)	0.286621	0.286417
JAK1	Janus kinase 1	0.0931094	0.816085
JAK2	Janus kinase 2	0.334419	0.589112
JUNB	jun B proto-oncogene	0.306103	0.720895
KLRG1	killer cell lectin-like receptor subfamily G_ member 1	0.163499	0.826132
KYAT1	NA	-0.0721498	0.930085
LAIR1	leukocyte-associated immunoglobulin-like receptor 1	0.245577	0.184763
LAMP1	lysosomal-associated membrane protein 1	0.330571	0.18473
LAMP2	lysosomal-associated membrane protein 2	0.0173273	0.916054
LAMTOR1	late endosomal/lysosomal adaptor_ MAPK and MTOR activator 1	0.0577155	0.811992
LCK	LCK proto-oncogene_ Src family tyrosine kinase	0.0240856	0.894734
LDHA	lactate dehydrogenase A	-0.166721	0.527017
LEF1	lymphoid enhancer-binding factor 1	-0.178922	0.347113
LPAR6	lysophosphatidic acid receptor 6	0.0671142	0.94855
LTB	lymphotoxin beta (TNF superfamily_ member 3)	1.02857	0.378483
MAGED1	melanoma antigen family D1	-0.301363	0.339537
MAP2K2	mitogen-activated protein kinase kinase 2	0.0421553	0.794349
MAP2K7	mitogen-activated protein kinase kinase 7	0.0744782	0.768119
MAP3K14	mitogen-activated protein kinase kinase kinase 14	0.490986	0.351975
MAP3K7	mitogen-activated protein kinase kinase kinase 7	0.0254532	0.91645
MAPK12	mitogen-activated protein kinase 12	-0.237039	0.701293
MAPK3	mitogen-activated protein kinase 3	-0.311944	0.522289
MAX	MYC associated factor X	0.19044	0.141261
MCAT	malonyl CoA:ACP acyltransferase (mitochondrial)	-0.228269	0.754627
MFN2	mitofusin 2	0.0969617	0.674883
MID1IP1	MID1 interacting protein 1	-0.229351	0.398375
MIF	macrophage migration inhibitory factor (glycosylation-inhibiting factor)	-0.246778	0.2739
MKI67	marker of proliferation Ki-67	0.0965624	0.552073
MPC2	mitochondrial pyruvate carrier 2	-0.29563	0.361318
MR1	major histocompatibility complex_ class I-related	0.0995357	0.882772
MTCP1	mature T-cell proliferation 1	0.0874628	0.902045
MTHFD1	methylenetetrahydrofolate dehydrogenase (NADP+ dependent) 1_ methenyltetrahydrofolate cyclohydrolase_ formyltetrahydrofolate synthetase	-0.0874495	0.538505
MTHFD2	methylenetetrahydrofolate dehydrogenase (NADP+ dependent) 2_ methenyltetrahydrofolate cyclohydrolase	0.124364	0.823753
MTHFR	methylenetetrahydrofolate reductase (NAD(P)H)	-0.118644	0.833663
MTHFS	5_10-methenyltetrahydrofolate synthetase (5-formyltetrahydrofolate cyclo-ligase)	0.250797	0.138257
NAA20	N(alpha)-acetyltransferase 20_ NatB catalytic subunit	0.0173241	0.920601
NCAPD2	non-SMC condensin I complex_ subunit D2	-0.285909	0.13679
NCAPG2	non-SMC condensin II complex_ subunit G2	-0.327726	0.235539
NCAPH	non-SMC condensin I complex_ subunit H	-0.116315	0.658503
NDUFA1	NADH dehydrogenase (ubiquinone) 1 alpha subcomplex_ 1_ 7.5kDa	-0.267057	0.577952
NDUFA2	NADH dehydrogenase (ubiquinone) 1 alpha subcomplex_ 2_ 8kDa	-0.257053	0.569844
NDUFA6	NADH dehydrogenase (ubiquinone) 1 alpha subcomplex_ 6_ 14kDa	-0.251158	0.220839
NDUFAB1	NADH dehydrogenase (ubiquinone) 1_ alpha/beta subcomplex_ 1_ 8kDa	-0.129948	0.677507
NDUFB9	NADH dehydrogenase (ubiquinone) 1 beta subcomplex_ 9_ 22kDa	-0.181887	0.227906
NEK2	NIMA-related kinase 2	-0.0911011	0.779446
NFAT5	nuclear factor of activated T-cells 5_ tonicity-responsive	0.819428	0.103336
NFATC1	nuclear factor of activated T-cells_ cytoplasmic_ calcineurin-dependent 1	-0.189825	0.66098
NFATC2IP	nuclear factor of activated T-cells_ cytoplasmic_ calcineurin-dependent 2 interacting protein	-0.297386	0.291918
NFIL3	nuclear factor_ interleukin 3 regulated	0.0147466	0.954083
NFKB2	nuclear factor of kappa light polypeptide gene enhancer in B-cells 2 (p49/p100)	0.314511	0.465906
NFKBIA	nuclear factor of kappa light polypeptide gene enhancer in B-cells inhibitor_ alpha	0.0334747	0.914199
NKG7	natural killer cell granule protein 7	0.228269	0.57418
NME1	NME/NM23 nucleoside diphosphate kinase 1	-0.141514	0.486592
NME2	NME/NM23 nucleoside diphosphate kinase 2	-0.0627147	0.83059
NMT1	N-myristoyltransferase 1	0.094374	0.623576
NOTCH1	notch 1	-0.0235868	0.908249
NOTCH2	notch 2	-0.27684	0.573975
NPRL3	NPR3-like_ GATOR1 complex subunit	-0.158065	0.633919
NR3C1	nuclear receptor subfamily 3_ group C_ member 1 (glucocorticoid receptor)	0.29956	0.227778
NRF1	nuclear respiratory factor 1	0.111893	0.827911
NSD2	Wolf-Hirschhorn syndrome candidate 1	-0.0412797	0.907579
NT5E	5'-nucleotidase_ ecto (CD73)	0.559427	0.606729
OAT	ornithine aminotransferase	-0.169925	0.583122
OMA1	OMA1 zinc metallopeptidase	0.160792	0.35911
OPA1	optic atrophy 1 (autosomal dominant)	-0.0659429	0.606967
OXSM	3-oxoacyl-ACP synthase_ mitochondrial	-0.0248747	0.92641
PARP1	poly (ADP-ribose) polymerase 1	-0.244356	0.145449
PCCA	propionyl CoA carboxylase_ alpha polypeptide	-0.16665	0.716362
PCK2	phosphoenolpyruvate carboxykinase 2 (mitochondrial)	0.947533	0.209157
PDHA1	pyruvate dehydrogenase (lipoamide) alpha 1	-0.0964451	0.831312
PDK1	pyruvate dehydrogenase kinase_ isozyme 1	-0.518729	0.124197
PDK3	pyruvate dehydrogenase kinase_ isozyme 3	-0.387023	0.357519
PECAM1	platelet/endothelial cell adhesion molecule 1	-0.0528122	0.768861
PFKFB4	6-phosphofructo-2-kinase/fructose-2_6-biphosphatase 4	-0.273018	0.725275
PFKP	phosphofructokinase_ platelet	-0.0306837	0.896719
PGK1	phosphoglycerate kinase 1	-0.259218	0.349498
PHGDH	phosphoglycerate dehydrogenase	0.23523	0.636229
PIDD1	p53-induced death domain protein 1	-0.289507	0.689146
PIK3C3	phosphatidylinositol 3-kinase_ catalytic subunit type 3	0.0937144	0.774351
PIK3R1	phosphoinositide-3-kinase_ regulatory subunit 1 (alpha)	0.342504	0.141201
PIK3R2	phosphoinositide-3-kinase_ regulatory subunit 2 (beta)	-0.356144	0.649967
PIK3R3	phosphoinositide-3-kinase_ regulatory subunit 3 (gamma)	-0.0203918	0.926559
PKM	pyruvate kinase_ muscle	0.0110195	0.880639
PLCB2	phospholipase C_ beta 2	0.425306	0.593538
PLCG1	phospholipase C_ gamma 1	-0.0997077	0.636458
PPARA	peroxisome proliferator-activated receptor alpha	-0.321928	0.631769
PPAT	phosphoribosyl pyrophosphate amidotransferase	0.0802561	0.646116
PPIA	peptidylprolyl isomerase A (cyclophilin A)	-0.315992	0.386485
PPP2R5D	protein phosphatase 2_ regulatory subunit B'_ delta	-0.0353812	0.826041
PPP3CA	protein phosphatase 3_ catalytic subunit_ alpha isozyme	-0.452512	0.53594
PPT2	palmitoyl-protein thioesterase 2	-0.376854	0.698778
PRF1	perforin 1 (pore forming protein)	0.415037	0.516896
PRICKLE3	prickle homolog 3	0.241008	0.660168
PRKAB2	protein kinase_ AMP-activated_ beta 2 non-catalytic subunit	-0.241008	0.647383
PRKCB	protein kinase C_ beta	-0.347504	0.499423
PRKCD	protein kinase C_ delta	-0.23816	0.692109
PSAT1	phosphoserine aminotransferase 1	0.523308	0.390902
PSMA2	proteasome subunit alpha 2	-0.100637	0.704925
PSMA3	proteasome subunit alpha 3	-0.107206	0.637426
PSMA6	proteasome subunit alpha 6	-0.269746	0.292834
PSMB10	proteasome subunit beta 10	0.125112	0.74819
PSPH	phosphoserine phosphatase	0.56706	0.457491
PTCD1	pentatricopeptide repeat domain 1	0.201634	0.743699
PTGER4	prostaglandin E receptor 4 (subtype EP4)	0.0398927	0.908151
PTK2B	protein tyrosine kinase 2 beta	0.240134	0.386126
PTPN6	protein tyrosine phosphatase_ non-receptor type 6	0.180107	0.270539
PTPRC	protein tyrosine phosphatase_ receptor type_ C	0.0613503	0.784178
PYCR1	pyrroline-5-carboxylate reductase 1	0.0897034	0.556442
PYCR2	pyrroline-5-carboxylate reductase family_ member 2	0.0865258	0.691041
PYCR3	pyrroline-5-carboxylate reductase-like	0.0259952	0.954683
RAC2	ras-related C3 botulinum toxin substrate 2 (rho family_ small GTP binding protein Rac2)	-0.124098	0.901495
RAE1	ribonucleic acid export 1	-0.104926	0.422703
RAI1	retinoic acid induced 1	-0.121306	0.641034
RBX1	ring-box 1_ E3 ubiquitin protein ligase	-0.355533	0.182357
RDH10	retinol dehydrogenase 10 (all-trans)	0.321928	0.531531
RDH14	retinol dehydrogenase 14 (all-trans/9-cis/11-cis)	0.117184	0.788764
RELA	v-rel avian reticuloendotheliosis viral oncogene homolog A	0.12883	0.719028
RIMKLA	ribosomal modification protein rimK-like family member A	-0.201634	0.73349
RNASEL	ribonuclease L (2'_5'-oligoisoadenylate synthetase-dependent)	0.0335526	0.935455
RORA	RAR-related orphan receptor A	-0.169925	0.735485
RPL23	ribosomal protein L23	-0.323073	0.271619
RPTOR	regulatory associated protein of MTOR_ complex 1	-0.127379	0.832845
RUNX3	runt-related transcription factor 3	0.311202	0.432311
SCD	stearoyl-CoA desaturase (delta-9-desaturase)	-0.179218	0.583127
SDHB	succinate dehydrogenase complex_ subunit B_ iron sulfur (Ip)	-0.138666	0.42083
SEC22B	SEC22 homolog B_ vesicle trafficking protein (gene/pseudogene)	0.111031	0.745924
SELL	selectin L	-0.068089	0.772976
SERINC1	serine incorporator 1	-0.0259952	0.916004
SERINC3	serine incorporator 3	0.148702	0.412493
SERPINB9	serpin peptidase inhibitor_ clade B (ovalbumin)_ member 9	-0.271302	0.687203
SH2D1A	SH2 domain containing 1A	-0.316538	0.23702
SH3BP2	SH3-domain binding protein 2	0.108253	0.804877
SHMT1	serine hydroxymethyltransferase 1 (soluble)	0.0247111	0.868276
SHMT2	serine hydroxymethyltransferase 2 (mitochondrial)	-0.163404	0.567201
SIK1	salt-inducible kinase 1	-0.192645	0.745091
SKP1	S-phase kinase-associated protein 1	-0.169366	0.663763
SLAMF6	SLAM family member 6	-0.175087	0.757396
SLC25A20	solute carrier family 25 (carnitine/acylcarnitine translocase)_ member 20	0.370838	0.294488
SLC25A6	solute carrier family 25 (mitochondrial carrier; adenine nucleotide translocator)_ member 6	-0.338253	0.160158
SLC2A1	solute carrier family 2 (facilitated glucose transporter)_ member 1	0.0614005	0.915101
SLC2A11	solute carrier family 2 (facilitated glucose transporter)_ member 11	0.0443941	0.91745
SMAD2	SMAD family member 2	-0.0664317	0.62447
SMAD3	SMAD family member 3	-0.152003	0.730594
SMAD5	SMAD family member 5	-0.186413	0.585627
SMARCA4	SWI/SNF related_ matrix associated_ actin dependent regulator of chromatin_ subfamily a_ member 4	0.0207104	0.842381
SMC2	structural maintenance of chromosomes 2	-0.0773489	0.636909
SMURF1	SMAD specific E3 ubiquitin protein ligase 1	-0.459432	0.562896
SOCS2	suppressor of cytokine signaling 2	-0.131245	0.858674
SOCS5	suppressor of cytokine signaling 5	-0.152003	0.820753
SOS2	son of sevenless homolog 2 (Drosophila)	-0.467779	0.57259
SRC	SRC proto-oncogene_ non-receptor tyrosine kinase	-0.309855	0.436237
STAM	signal transducing adaptor molecule (SH3 domain and ITAM motif) 1	-0.403603	0.432879
STAT2	signal transducer and activator of transcription 2_ 113kDa	0.704544	0.403528
STAT3	signal transducer and activator of transcription 3 (acute-phase response factor)	0.048156	0.868916
STAT5A	signal transducer and activator of transcription 5A	-0.0435893	0.958725
STAT5B	signal transducer and activator of transcription 5B	-0.134693	0.690509
STAT6	signal transducer and activator of transcription 6_ interleukin-4 induced	-0.0516621	0.80797
STK11	serine/threonine kinase 11	-0.115477	0.722425
TAOK2	TAO kinase 2	0.215013	0.653157
TCF7	transcription factor 7 (T-cell specific_ HMG-box)	-0.0658801	0.87432
TERT	telomerase reverse transcriptase	-0.353637	0.52021
TET2	tet methylcytosine dioxygenase 2	0.256014	0.723163
TFAM	transcription factor A_ mitochondrial	0.11589	0.519524
TFB2M	transcription factor B2_ mitochondrial	0.169741	0.39686
TFDP1	transcription factor Dp-1	-0.0416316	0.863255
TFRC	transferrin receptor	0.0734518	0.646296
TGFB1	transforming growth factor_ beta 1	-0.08397	0.613046
TGFBR2	transforming growth factor_ beta receptor II (70/80kDa)	-0.226276	0.401505
TGIF2	TGFB-induced factor homeobox 2	0.13691	0.771878
TICAM1	toll-like receptor adaptor molecule 1	-0.0984037	0.885273
TIMM17A	translocase of inner mitochondrial membrane 17 homolog A (yeast)	0.0215153	0.895131
TIMM23	translocase of inner mitochondrial membrane 23 homolog (yeast)	-0.0153015	0.93345
TKT	transketolase	-0.157617	0.33358
TNFRSF10B	tumor necrosis factor receptor superfamily_ member 10b	0.302563	0.564451
TNFSF9	tumor necrosis factor (ligand) superfamily_ member 9	0.247928	0.695078
TOLLIP	toll interacting protein	-0.0387324	0.889741
TOMM6	translocase of outer mitochondrial membrane 6 homolog (yeast)	-0.0305164	0.906323
TOX	thymocyte selection-associated high mobility group box	-0.0639678	0.804653
TP53	tumor protein p53	0.0715533	0.904533
TRAC	T cell receptor alpha constant	0.276709	0.39006
TRAF3	TNF receptor-associated factor 3	0.0345572	0.848279
TRAF5	TNF receptor-associated factor 5	-0.0306968	0.921394
TRAF6	TNF receptor-associated factor 6_ E3 ubiquitin protein ligase	0.0623965	0.812105
TRAV16	T cell receptor alpha variable 16	-0.353637	0.648422
TRAV17	T cell receptor alpha variable 17	0.130061	0.837585
TRAV18	T cell receptor alpha variable 18	0.409391	0.512878
TRAV19	T cell receptor alpha variable 19	0.0848889	0.837199
TRBC1/2	NA	-0.0728287	0.649513
TRBV10-3	T cell receptor beta variable 10-3	-0.29956	0.809174
TRBV12-3	T cell receptor beta variable 12-3	-0.0392654	0.93617
TRBV13	T cell receptor beta variable 13	-1.23704	0.174292
TRBV28	T cell receptor beta variable 28	-0.237186	0.840319
TRBV6-9	T cell receptor beta variable 6-9	-0.398549	0.563951
TRBV7-2	T cell receptor beta variable 7-2	-0.403516	0.123581
TRBV7-3	T cell receptor beta variable 7-3	-0.285402	0.686079
TRBV7-8	T cell receptor beta variable 7-8	-0.532874	0.428896
TRGV3/5	NA	0.270648	0.638209
TRGV8	T cell receptor gamma variable 8	0.289507	0.517933
TRIM26	tripartite motif containing 26	0.428843	0.194382
TRIM33	tripartite motif containing 33	0.106658	0.476332
TRIM34	tripartite motif containing 34	0.119299	0.845597
TSC2	tuberous sclerosis 2	-0.212408	0.361575
TYK2	tyrosine kinase 2	-0.13493	0.726541
UBE2F	ubiquitin-conjugating enzyme E2F (putative)	-0.152258	0.644313
UBE2I	ubiquitin-conjugating enzyme E2I	0.23754	0.33209
UBE2V1	ubiquitin-conjugating enzyme E2 variant 1	0.0376744	0.80458
UQCR10	ubiquinol-cytochrome c reductase_ complex III subunit X	-0.190431	0.708177
UQCRQ	ubiquinol-cytochrome c reductase_ complex III subunit VII_ 9.5kDa	-0.241935	0.257241
USP15	ubiquitin specific peptidase 15	0.497958	0.210041
VAV1	vav 1 guanine nucleotide exchange factor	0.0883024	0.528617
VAV3	vav 3 guanine nucleotide exchange factor	0.0199147	0.857682
VSIR	NA	-0.0995357	0.893563
WAS	Wiskott-Aldrich syndrome	0.100604	0.763205
WDR45	WD repeat domain 45	-0.0473057	0.944154
ZAP70	zeta-chain (TCR) associated protein kinase 70kDa	-0.12204	0.414399
ZBTB16	zinc finger and BTB domain containing 16	-0.559967	0.430231
MTOR	mechanistic target of rapamycin (serine/threonine kinase)	0.0114956	0.962501
ACOT2	acyl-CoA thioesterase 2	0	1
ACSL5	acyl-CoA synthetase long-chain family member 5	0	1
ACVR1C	activin A receptor_ type IC	0	1
ACVR2A	activin A receptor_ type IIA	0	1
ADAR1 P110 ISOFORM	NA	0	1
ADAR1 P150 ISOFORM	NA	0	1
ADAR2	adenosine deaminase_ RNA-specific_ B1	0	1
AHR	aryl hydrocarbon receptor	0	1
ALDH1L1	aldehyde dehydrogenase 1 family_ member L1	0	1
ALDH1L2	aldehyde dehydrogenase 1 family_ member L2	0	1
ALDH8A1	aldehyde dehydrogenase 8 family_ member A1	0	1
ANGPT2	angiopoietin 2	0	1
APOBEC3B	apolipoprotein B mRNA editing enzyme_ catalytic polypeptide-like 3B	0	1
APOBEC3G	apolipoprotein B mRNA editing enzyme_ catalytic polypeptide-like 3G	0	1
AREG	amphiregulin	0	1
B3GAT1	beta-1_3-glucuronyltransferase 1	0	1
BCL2L1	BCL2-like 1	0.00416362	0.991387
BCL6	B-cell CLL/lymphoma 6	-1.03172e-15	1
C3	complement component 3	0	1
CARD10	caspase recruitment domain family_ member 10	0	1
CCL1	chemokine (C-C motif) ligand 1	0	1
CCL11	chemokine (C-C motif) ligand 11	0	1
CCL13	chemokine (C-C motif) ligand 13	0	1
CCL14	chemokine (C-C motif) ligand 14	0	1
CCL15	chemokine (C-C motif) ligand 15	0	1
CCL16	chemokine (C-C motif) ligand 16	0	1
CCL17	chemokine (C-C motif) ligand 17	0	1
CCL18	chemokine (C-C motif) ligand 18 (pulmonary and activation-regulated)	0	1
CCL19	chemokine (C-C motif) ligand 19	0	1
CCL2	chemokine (C-C motif) ligand 2	0	1
CCL20	chemokine (C-C motif) ligand 20	0	1
CCL21	chemokine (C-C motif) ligand 21	0	1
CCL22	chemokine (C-C motif) ligand 22	0	1
CCL23	chemokine (C-C motif) ligand 23	0	1
CCL24	chemokine (C-C motif) ligand 24	0	1
CCL25	chemokine (C-C motif) ligand 25	0	1
CCL26	chemokine (C-C motif) ligand 26	0	1
CCL27	chemokine (C-C motif) ligand 27	0	1
CCL28	chemokine (C-C motif) ligand 28	0	1
CCL3/L1	NA	0	1
CCL4/L1	NA	0	1
CCL5	chemokine (C-C motif) ligand 5	0	1
CCL7	chemokine (C-C motif) ligand 7	0	1
CCL8	chemokine (C-C motif) ligand 8	0	1
CCR2	chemokine (C-C motif) receptor 2	0	1
CCR5	chemokine (C-C motif) receptor 5 (gene/pseudogene)	0	1
CCR6	chemokine (C-C motif) receptor 6	0	1
CCR7	chemokine (C-C motif) receptor 7	0	1
CD14	CD14 molecule	0	1
CD160	CD160 molecule	0	1
CD163	CD163 molecule	0	1
CD19	CD19 molecule	0	1
CD200	CD200 molecule	0	1
CD209	CD209 molecule	0	1
CD22	CD22 molecule	0	1
CD244	CD244 molecule_ natural killer cell receptor 2B4	0	1
CD27	CD27 molecule	0	1
CD274	CD274 molecule	0	1
CD276	CD276 molecule	0	1
CD300C	CD300c molecule	0	1
CD300E	CD300e molecule	0	1
CD300LF	CD300 molecule-like family member f	0	1
CD33	CD33 molecule	0	1
CD40	CD40 molecule_ TNF receptor superfamily member 5	0	1
CD68	CD68 molecule	0	1
CD80	CD80 molecule	0	1
CD86	CD86 molecule	0	1
CD8A	CD8a molecule	0	1
CD8B	CD8b molecule	0	1
CEACAM1	carcinoembryonic antigen-related cell adhesion molecule 1 (biliary glycoprotein)	0	1
CEACAM3	carcinoembryonic antigen-related cell adhesion molecule 3	0	1
CIITA	class II_ major histocompatibility complex_ transactivator	0	1
CISH	cytokine inducible SH2-containing protein	0	1
CLCF1	cardiotrophin-like cytokine factor 1	0	1
CLDN1	claudin 1	0	1
CLDN23	claudin 23	0	1
CLDN3	claudin 3	0	1
CLDN4	claudin 4	0	1
CLDN7	claudin 7	0	1
CMKLR1	chemerin chemokine-like receptor 1	0	1
COLEC12	collectin sub-family member 12	0	1
CPA3	carboxypeptidase A3 (mast cell)	0	1
CRLF2	cytokine receptor-like factor 2	0	1
CSF2	colony stimulating factor 2 (granulocyte-macrophage)	0	1
CSF2RA	colony stimulating factor 2 receptor_ alpha_ low-affinity (granulocyte-macrophage)	0	1
CSF3	colony stimulating factor 3 (granulocyte)	0	1
CSF3R	colony stimulating factor 3 receptor (granulocyte)	0	1
CTLA4	cytotoxic T-lymphocyte-associated protein 4	0	1
CTNND1	catenin (cadherin-associated protein)_ delta 1	0	1
CTSS	cathepsin S	0	1
CX3CL1	chemokine (C-X3-C motif) ligand 1	0	1
CXCL1	chemokine (C-X-C motif) ligand 1 (melanoma growth stimulating activity_ alpha)	0	1
CXCL10	chemokine (C-X-C motif) ligand 10	0	1
CXCL11	chemokine (C-X-C motif) ligand 11	0	1
CXCL12	chemokine (C-X-C motif) ligand 12	0	1
CXCL13	chemokine (C-X-C motif) ligand 13	0	1
CXCL14	chemokine (C-X-C motif) ligand 14	0	1
CXCL16	chemokine (C-X-C motif) ligand 16	0	1
CXCL2	chemokine (C-X-C motif) ligand 2	0	1
CXCL5	chemokine (C-X-C motif) ligand 5	0	1
CXCL6	chemokine (C-X-C motif) ligand 6	0	1
CXCL8	chemokine (C-X-C motif) ligand 8	0	1
CXCL9	chemokine (C-X-C motif) ligand 9	0	1
CXCR5	chemokine (C-X-C motif) receptor 5	0	1
CXCR6	chemokine (C-X-C motif) receptor 6	0	1
CYBB	cytochrome b-245_ beta polypeptide	0	1
DDX17	DEAD (Asp-Glu-Ala-Asp) box helicase 17	0	1
DDX5	DEAD (Asp-Glu-Ala-Asp) box helicase 5	0	1
DDX58 (RIG-I)	NA	0	1
DHX9	DEAH (Asp-Glu-Ala-His) box helicase 9	0	1
DLL1	delta-like 1 (Drosophila)	0	1
EBI3	Epstein-Barr virus induced 3	0	1
EGF	epidermal growth factor	0	1
EGR1	early growth response 1	0	1
ENTPD1	ectonucleoside triphosphate diphosphohydrolase 1	0	1
ENTPD2	ectonucleoside triphosphate diphosphohydrolase 2	0	1
EOMES	eomesodermin	0	1
FASLG	Fas ligand (TNF superfamily_ member 6)	0	1
FCAR	Fc fragment of IgA receptor	0	1
FCGR3A/B	NA	0	1
FCRL2	Fc receptor-like 2	0	1
FOS	FBJ murine osteosarcoma viral oncogene homolog	0	1
FOSB	FBJ murine osteosarcoma viral oncogene homolog B	0	1
FOXO1	forkhead box O1	0	1
FOXP3	forkhead box P3	0	1
FPR1	formyl peptide receptor 1	0	1
GLI1	GLI family zinc finger 1	0	1
GLS2	glutaminase 2 (liver_ mitochondrial)	0	1
GNAI2	guanine nucleotide binding protein (G protein)_ alpha inhibiting activity polypeptide 2	0.0109632	0.974855
GNLY	granulysin	0	1
GZMB	granzyme B (granzyme 2_ cytotoxic T-lymphocyte-associated serine esterase 1)	0	1
GZMH	granzyme H (cathepsin G-like 2_ protein h-CCPX)	0	1
GZMK	granzyme K (granzyme 3; tryptase II)	0	1
GZMM	granzyme M (lymphocyte met-ase 1)	0	1
HACD4	3-hydroxyacyl-CoA dehydratase 4	0	1
HAVCR2	hepatitis A virus cellular receptor 2	0	1
HDC	histidine decarboxylase	0	1
HK3	kallikrein-related peptidase 3	0	1
HLA-DQA1	major histocompatibility complex_ class II_ DQ alpha 1	0	1
HLA-DRA	major histocompatibility complex_ class II_ DR alpha	0	1
HLA-DRB1	major histocompatibility complex_ class II_ DR beta 1	0	1
HSD11B1	hydroxysteroid (11-beta) dehydrogenase 1	0	1
ICAM1	intercellular adhesion molecule 1	0	1
ICOS	inducible T-cell co-stimulator	0	1
ICOSLG	inducible T-cell co-stimulator ligand	0	1
IDO1	indoleamine 2_3-dioxygenase 1	0	1
IDO2	indoleamine 2_3-dioxygenase 2	0	1
IFIH1 (MDA5)	NA	0	1
IFITM3	interferon induced transmembrane protein 3	0	1
IFNA1	interferon_ alpha 1	0	1
IFNB1	interferon_ beta 1_ fibroblast	0	1
IFNG	interferon_ gamma	0	1
IKZF4	IKAROS family zinc finger 4 (Eos)	0	1
IL10	interleukin 10	0	1
IL11	interleukin 11	0	1
IL12A	interleukin 12A	0	1
IL12B	interleukin 12B	0	1
IL12RB1	interleukin 12 receptor_ beta 1	0	1
IL12RB2	interleukin 12 receptor_ beta 2	0	1
IL13	interleukin 13	0	1
IL17A	interleukin 17A	0	1
IL17C	interleukin 17C	0	1
IL17F	interleukin 17F	0	1
IL18	interleukin 18	0	1
IL19	interleukin 19	0	1
IL1A	interleukin 1_ alpha	0	1
IL1B	interleukin 1_ beta	0	1
IL1F10	interleukin 1 family_ member 10 (theta)	0	1
IL1R1	interleukin 1 receptor_ type I	0	1
IL1RN	interleukin 1 receptor antagonist	0	1
IL2	interleukin 2	0	1
IL20	interleukin 20	0	1
IL21	interleukin 21	0	1
IL21R	interleukin 21 receptor	0	1
IL22	interleukin 22	0	1
IL23R	interleukin 23 receptor	0	1
IL24	interleukin 24	0	1
IL25	interleukin 25	0	1
IL26	interleukin 26	0	1
IL27	interleukin 27	0	1
IL2RA	interleukin 2 receptor_ alpha	0	1
IL2RB	interleukin 2 receptor_ beta	0	1
IL3	interleukin 3	0	1
IL31	interleukin 31	0	1
IL33	interleukin 33	0	1
IL36B	interleukin 36_ beta	0	1
IL36G	interleukin 36_ gamma	0	1
IL36RN	interleukin 36 receptor antagonist	0	1
IL37	interleukin 37	0	1
IL3RA	interleukin 3 receptor_ alpha (low affinity)	0	1
IL4	interleukin 4	0	1
IL4R	interleukin 4 receptor	0	1
IL5	interleukin 5	0	1
IL6	interleukin 6	0	1
IL6R	interleukin 6 receptor	0	1
IL7	interleukin 7	0	1
IL9	interleukin 9	0	1
IRF4	interferon regulatory factor 4	0	1
IRF5	interferon regulatory factor 5	0	1
IRF6	interferon regulatory factor 6	0	1
ITGAM	integrin_ alpha M (complement component 3 receptor 3 subunit)	0	1
JAG1	jagged 1	0	1
KIR3DL1/2	NA	0	1
KLRB1	killer cell lectin-like receptor subfamily B_ member 1	0	1
KLRC1/2	NA	0	1
KLRD1	killer cell lectin-like receptor subfamily D_ member 1	0	1
KLRF1	killer cell lectin-like receptor subfamily F_ member 1	0	1
KLRK1	killer cell lectin-like receptor subfamily K_ member 1	0	1
LAG3	lymphocyte-activation gene 3	0	1
LDHC	lactate dehydrogenase C	0	1
LEFTY1	left-right determination factor 1	0	1
LIF	leukemia inhibitory factor	0	1
LILRA1	leukocyte immunoglobulin-like receptor_ subfamily A (with TM domain)_ member 1	0	1
LILRA5	leukocyte immunoglobulin-like receptor_ subfamily A (with TM domain)_ member 5	0	1
LILRB2	leukocyte immunoglobulin-like receptor_ subfamily B (with TM and ITIM domains)_ member 2	0	1
LILRB3	leukocyte immunoglobulin-like receptor_ subfamily B (with TM and ITIM domains)_ member 3	0	1
LILRB4	leukocyte immunoglobulin-like receptor_ subfamily B (with TM and ITIM domains)_ member 4	0	1
LIN28A	lin-28 homolog A (C. elegans)	0	1
LIN28B	lin-28 homolog B (C. elegans)	0	1
LNX1	ligand of numb-protein X 1_ E3 ubiquitin protein ligase	0	1
LTA	lymphotoxin alpha	0	1
MAF	v-maf avian musculoaponeurotic fibrosarcoma oncogene homolog	0	1
MALAT1	metastasis associated lung adenocarcinoma transcript 1 (non-protein coding)	0	1
MAML2	mastermind-like transcriptional coactivator 2	0	1
MAML3	mastermind-like transcriptional coactivator 3	0	1
MAVS	mitochondrial antiviral signaling protein	0	1
MDFIC	MyoD family inhibitor domain containing	0	1
MDH2	malate dehydrogenase 2_ NAD (mitochondrial)	4.83007e-17	1
METTL14	methyltransferase like 14	0	1
METTL3	methyltransferase like 3	0	1
MINOS1	mitochondrial inner membrane organizing system 1	0	1
MMP2	matrix metallopeptidase 2	0	1
MMP9	matrix metallopeptidase 9	0	1
MS4A1	membrane-spanning 4-domains_ subfamily A_ member 1	0	1
MS4A2	membrane-spanning 4-domains_ subfamily A_ member 2	0	1
MS4A4A	membrane-spanning 4-domains_ subfamily A_ member 4A	0	1
MYL9	myosin_ light chain 9_ regulatory	0	1
NBL1	neuroblastoma 1_ DAN family BMP antagonist	0	1
NCAM1	neural cell adhesion molecule 1	0	1
NCR1	natural cytotoxicity triggering receptor 1	0	1
NCR2	natural cytotoxicity triggering receptor 2	0	1
NCR3	natural cytotoxicity triggering receptor 3	0	1
NEAT1	nuclear paraspeckle assembly transcript 1 (non-protein coding)	0	1
NOD2	nucleotide-binding oligomerization domain containing 2	0	1
NRL	neural retina leucine zipper	0	1
OASL	2'-5'-oligoadenylate synthetase-like	0	1
PDCD1	programmed cell death 1	0	1
PDCD1LG2	programmed cell death 1 ligand 2	0	1
PDGFRA	platelet-derived growth factor receptor_ alpha polypeptide	0	1
PDPN	podoplanin	0	1
PGAM1	phosphoglycerate mutase 1 (brain)	-0.00655606	0.975881
PLA2G4B	phospholipase A2_ group IVB (cytosolic)	0	1
PLCB3	phospholipase C_ beta 3 (phosphatidylinositol-specific)	0	1
PNOC	prepronociceptin	0	1
PPARD	peroxisome proliferator-activated receptor delta	0	1
PPARGC1A	peroxisome proliferator-activated receptor gamma_ coactivator 1 alpha	0	1
PRDM1	PR domain containing 1_ with ZNF domain	0	1
PROCR	protein C receptor_ endothelial	0	1
PTGDR2	prostaglandin D2 receptor 2	0	1
PTGER2	prostaglandin E receptor 2 (subtype EP2)_ 53kDa	0	1
PTGS1	prostaglandin-endoperoxide synthase 1 (prostaglandin G/H synthase and cyclooxygenase)	0	1
PTGS2	prostaglandin-endoperoxide synthase 2 (prostaglandin G/H synthase and cyclooxygenase)	0	1
RARB	retinoic acid receptor_ beta	0	1
RARG	retinoic acid receptor_ gamma	-6.97363e-16	1
RDH5	retinol dehydrogenase 5 (11-cis/9-cis)	0	1
RORC	RAR-related orphan receptor C	-2.9573e-16	1
S100A12	S100 calcium binding protein A12	0	1
SELPLG	selectin P ligand	0	1
SERINC4	serine incorporator 4	0	1
SGK3	serum/glucocorticoid regulated kinase family_ member 3	0.0297473	0.970599
SGO2	shugoshin-like 2 (S. pombe)	-2.18527e-15	1
SIGLEC5	sialic acid binding Ig-like lectin 5	0	1
SLAMF7	SLAM family member 7	0	1
SLC27A3	solute carrier family 27 (fatty acid transporter)_ member 3	0	1
SLC2A2	solute carrier family 2 (facilitated glucose transporter)_ member 2	0	1
SOCS4	suppressor of cytokine signaling 4	5.96599e-16	1
SOX4	SRY (sex determining region Y)-box 4	0	1
SPIB	Spi-B transcription factor (Spi-1/PU.1 related)	0	1
SRR	serine racemase	0.00392268	0.997975
STAT4	signal transducer and activator of transcription 4	0	1
TBX21	T-box 21	0	1
TCL1A	T-cell leukemia/lymphoma 1A	0	1
TGFBR1	transforming growth factor_ beta receptor 1	-0.00628626	0.983669
TIGIT	T cell immunoreceptor with Ig and ITIM domains	0	1
TIMP1	TIMP metallopeptidase inhibitor 1	0	1
TLR2	toll-like receptor 2	0	1
TLR4	toll-like receptor 4	0	1
TLR9	toll-like receptor 9	0	1
TNF	tumor necrosis factor	0	1
TNFRSF11A	tumor necrosis factor receptor superfamily_ member 11a_ NFKB activator	0	1
TNFRSF17	tumor necrosis factor receptor superfamily_ member 17	0	1
TNFRSF18	tumor necrosis factor receptor superfamily_ member 18	0	1
TNFRSF4	tumor necrosis factor receptor superfamily_ member 4	0	1
TNFRSF9	tumor necrosis factor receptor superfamily_ member 9	0	1
TNFSF13B	tumor necrosis factor (ligand) superfamily_ member 13b	0	1
TPR	translocated promoter region_ nuclear basket protein	-0.011588	0.974772
TPSAB1/B2	NA	0	1
TRAT1	T cell receptor associated transmembrane adaptor 1	-0.014797	0.971858
TRAV1-1	T cell receptor alpha variable 1-1	0	1
TRAV1-2	T cell receptor alpha variable 1-2	0	1
TRAV10	T cell receptor alpha variable 10	0	1
TRAV11	T cell receptor alpha variable 11 (pseudogene)	0	1
TRAV12-1	T cell receptor alpha variable 12-1	0	1
TRAV12-2	T cell receptor alpha variable 12-2	0	1
TRAV12-3	T cell receptor alpha variable 12-3	0	1
TRAV13-1	T cell receptor alpha variable 13-1	0	1
TRAV13-2	T cell receptor alpha variable 13-2	0	1
TRAV14	NA	0	1
TRAV2	T cell receptor alpha variable 2	0	1
TRAV20	T cell receptor alpha variable 20	0	1
TRAV21	T cell receptor alpha variable 21	0	1
TRAV22	T cell receptor alpha variable 22	0	1
TRAV23	NA	0	1
TRAV24	T cell receptor alpha variable 24	0	1
TRAV25	T cell receptor alpha variable 25	0	1
TRAV26-1	T cell receptor alpha variable 26-1	0	1
TRAV26-2	T cell receptor alpha variable 26-2	0	1
TRAV27	T cell receptor alpha variable 27	0	1
TRAV29	NA	0	1
TRAV3	T cell receptor alpha variable 3 (gene/pseudogene)	0	1
TRAV30	T cell receptor alpha variable 30	0	1
TRAV34	T cell receptor alpha variable 34	0	1
TRAV35	T cell receptor alpha variable 35	0	1
TRAV36	NA	0	1
TRAV38-1	T cell receptor alpha variable 38-1	0	1
TRAV38-2	NA	0	1
TRAV39	T cell receptor alpha variable 39	0	1
TRAV4	T cell receptor alpha variable 4	0	1
TRAV40	T cell receptor alpha variable 40	0	1
TRAV41	T cell receptor alpha variable 41	0	1
TRAV5	T cell receptor alpha variable 5	0	1
TRAV6	T cell receptor alpha variable 6	0	1
TRAV7	T cell receptor alpha variable 7	0	1
TRAV8-1	T cell receptor alpha variable 8-1	0	1
TRAV8-3	T cell receptor alpha variable 8-3	0	1
TRAV8-6	T cell receptor alpha variable 8-6	0	1
TRAV9-1	T cell receptor alpha variable 9-1	0	1
TRAV9-2	T cell receptor alpha variable 9-2	0	1
TRBV10-1	T cell receptor beta variable 10-1(gene/pseudogene)	0	1
TRBV10-2	T cell receptor beta variable 10-2	0	1
TRBV11-1	T cell receptor beta variable 11-1	0	1
TRBV11-2	T cell receptor beta variable 11-2	0	1
TRBV11-3	T cell receptor beta variable 11-3	0	1
TRBV12-5	T cell receptor beta variable 12-5	0	1
TRBV14	T cell receptor beta variable 14	0	1
TRBV15	T cell receptor beta variable 15	0	1
TRBV16	T cell receptor beta variable 16 (gene/pseudogene)	0	1
TRBV18	T cell receptor beta variable 18	0	1
TRBV19	T cell receptor beta variable 19	0	1
TRBV2	T cell receptor beta variable 2	0	1
TRBV20-1	T cell receptor beta variable 20-1	0	1
TRBV24-1	T cell receptor beta variable 24-1	0	1
TRBV25-1	T cell receptor beta variable 25-1	0	1
TRBV27	T cell receptor beta variable 27	0	1
TRBV29-1	T cell receptor beta variable 29-1	0	1
TRBV3-1	T cell receptor beta variable 3-1	0	1
TRBV30	T cell receptor beta variable 30 (gene/pseudogene)	0	1
TRBV4-1	T cell receptor beta variable 4-1	0	1
TRBV4-2	T cell receptor beta variable 4-2	0	1
TRBV4-3	T cell receptor beta variable 4-3	0	1
TRBV5-1	T cell receptor beta variable 5-1	0	1
TRBV5-4	T cell receptor beta variable 5-4	0	1
TRBV5-5	T cell receptor beta variable 5-5	0	1
TRBV5-6	T cell receptor beta variable 5-6	0	1
TRBV5-8	T cell receptor beta variable 5-8	0	1
TRBV6-1	T cell receptor beta variable 6-1	0	1
TRBV6-2	T cell receptor beta variable 6-2 (gene/pseudogene)	0	1
TRBV6-4	T cell receptor beta variable 6-4	0	1
TRBV6-5	T cell receptor beta variable 6-5	0	1
TRBV6-6	T cell receptor beta variable 6-6	0	1
TRBV6-8	T cell receptor beta variable 6-8	0	1
TRBV7-4	T cell receptor beta variable 7-4 (gene/pseudogene)	0	1
TRBV7-6	T cell receptor beta variable 7-6	0	1
TRBV7-7	T cell receptor beta variable 7-7	0	1
TRBV7-9	T cell receptor beta variable 7-9	0	1
TRBV9	T cell receptor beta variable 9	0	1
TRDC	T cell receptor delta constant	0	1
TRDV1	T cell receptor delta variable 1	0	1
TRDV2	T cell receptor delta variable 2	0	1
TRDV3	T cell receptor delta variable 3	0	1
TREM1	triggering receptor expressed on myeloid cells 1	0	1
TRGC1	T cell receptor gamma constant 1	0	1
TRGC2	T cell receptor gamma constant 2	0	1
TRGV2	T cell receptor gamma variable 2	0	1
TRGV4	T cell receptor gamma variable 4	0	1
TRGV9	T cell receptor gamma variable 9	0	1
TRIM10	tripartite motif containing 10	0	1
TRIM22	tripartite motif containing 22	0	1
TRIM31	tripartite motif containing 31	0	1
TYROBP	TYRO protein tyrosine kinase binding protein	0	1
UBA5	ubiquitin-like modifier activating enzyme 5	-0.00457273	0.99369
XCL1/2	NA	0	1
